# Supplementary material
Source: publisher figshare collection journal article supplement (https://acs.figshare.com/ndownloader/files/15264320)
Supplement: Supplementary file 1 [file 15264320]

**Total Synthesis of (-)- Preussochromone D**

Eric Kerste<sup>†</sup>, Klaus Harms<sup>†</sup>, Ulrich Koert<sup>†\*</sup>

<sup>†</sup>Department of chemistry, Philipps-Universität Marburg, Hans-Meerwein-Strasse 4, D-35043  
Marburg, Germany

koert@chemie.uni-marburg.de

Experimental procedures, spectroscopic and analytical data  
of all new compounds

|   |                                                                         |    |
|---|-------------------------------------------------------------------------|----|
| 1 | General Methods and Materials .....                                     | 3  |
| 2 | Synthetic Procedures for the Preparation of Preussochromone D (3) ..... | 5  |
| 3 | $^1\text{H}$ , $^{13}\text{C}$ & $^{19}\text{F}$ -NMR.....              | 28 |
| 4 | X-Ray .....                                                             | 49 |
| 5 | Literature.....                                                         | 54 |

# 1 General Methods and Materials

All non-aqueous reactions were carried out using flame-dried glassware under argon atmosphere. All solvents were distilled by rotary evaporation. Solvents for non-aqueous reactions were dried as follows prior to use: THF was dried with KOH and subsequently distilled from Solvona®. CH<sub>2</sub>Cl<sub>2</sub> was distilled from CaH<sub>2</sub>. MeOH was dried by refluxing with Mg-turnings (5g/L) and subsequent distillation. Toluene was distilled from Solvona®. MeCN All commercially available reagents and reactants were used without purification unless otherwise noted.

Reactions were monitored by thin layer chromatography (TLC) using Merck Silica Gel 60 F<sub>254</sub>-plates and visualized by fluorescence quenching under UV-light. In addition, TLC-plates were stained using a ceric sulfate/phosphomolybdic acid stain. Chromatographic purification of products was performed on Merck Silica Gel 60 (230-400 mesh) unless otherwise noted using a forced flow of eluents. Concentration under reduced pressure was performed by rotary evaporation at 40 °C and appropriate pressure and by exposing to fine vacuum at room temperature if necessary.

NMR spectra were recorded on a Bruker AV 300 MHz, AV III 500 MHz, AV III HD 500 MHz spectrometer at room temperature. Chemical shifts are reported in ppm with the solvent resonance as internal standard. Data are reported as follows: s = singlet, d = doublet, t = triplet, q = quartet, quint = quintet, m = multiplet.

Mass spectra were recorded by the mass service department of the Philipps-Universität Marburg. HR-ESI mass spectra were acquired with an LTQ-FT mass spectrometer (Thermo Fischer Scientific). The resolution was set to 100 000.

IR spectra were recorded on a Bruker IFS 200 spectrometer. The absorption bands are given in wave numbers (cm<sup>-1</sup>), intensities are reported as follows: s = strong, m = medium, w = weak, br = broad band.

Melting points were determined on a Mettler Toledo MP70 using one end closed capillary tubes.

Optical rotations were determined at 20 °C with a Krüss P8000-T polarimeter.

Diastereomeric ratios were accurately determined by integration of <sup>1</sup>H-NMR spectra.

Optical rotations were determined at 20 °C for the Na-D wavelength (589 nm) with a Krüss P8000 T polarimeter.

Emission and UV/Vis spectra were recorded on a SpectraMax M5 (Molecular Devices).  
Spectral bandwidth: 9 nm (excitation) 15 nm (emission).

Room temperature was 21 – 24 °C.

## 2 Synthetic Procedures for the Preparation of Preussochromone D (3)

### 2.1 5-(difluoromethoxy)-4*H*-chromen-4-one **12**

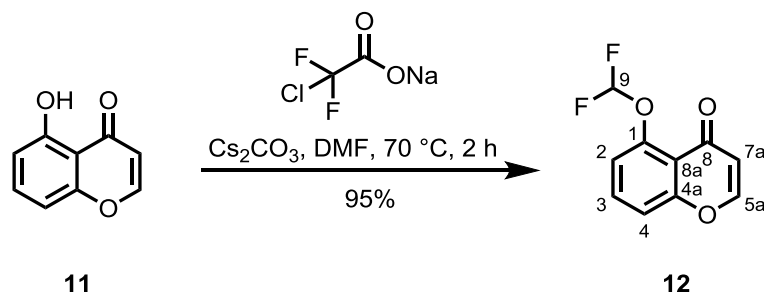

Hydroxy chromenone **11** (2.76 g, 17.0 mmol, 1.00 equiv), sodium chlorodifluoroacetate (6.48 g, 42.5, 2.50 equiv) and cesium carbonate (27.7 g, 85.0 mmol, 5.00 equiv) were suspended in dry DMF (200 mL) and heated to 70 °C for 2 h. H<sub>2</sub>O (300 mL) was added and the mixture was stirred until all solids were dissolved, then EtOAc (150 mL) was added. The reaction was transferred to a separation funnel, the layers were separated and the aqueous layer was further extracted with EtOAc (4x100 mL). The combined organic layers were dried over Na<sub>2</sub>SO<sub>4</sub> and concentrated under reduced pressure. The residue was purified by column chromatography (silica, *n*-pentane/EtOAc 2:1) to obtain difluoromethyl ether **12** (3.43 g, 16.2 mmol, 95%) as pale yellow powder.

**TLC:**  $R_f$  = 0.55 (*n*-pentane/EtOAc 1:1). **<sup>1</sup>H-NMR:** 500 MHz, CDCl<sub>3</sub>;  $\delta$ =7.77 (d, 1H,  $J$ =6.0 Hz, 5a-H), 7.62 (t, 1H,  $J$ =8.3 Hz, 3-H), 7.38 (dd, 1H,  $J$ =1.0 Hz, 8.6 Hz, 4-H), 7.19 (dd, 1H,  $J$ =0.5 Hz, 8.0 Hz, 2-H), 6.68 (t, 1H,  $J$ =75.4 Hz, 9-H), 6.28 (d, 1H,  $J$ =6.0 Hz, 7a-H) ppm. **<sup>13</sup>C-NMR:** 125 MHz, CDCl<sub>3</sub>;  $\delta$ =125 MHz, CDCl<sub>3</sub>;  $\delta$  = 176.4 (8-C), 157.9 (4a-C), 154.2 (5a-C), 149.1 (1-C), 133.7 (3-C), 119.7 (2-C), 118.6 (8a-C), 116.8 (4-C), 116.5 (t,  $J$ =261.7 Hz, 9-C), 114.5 (7a-C) ppm. **<sup>19</sup>F-NMR:** 282 MHz, CDCl<sub>3</sub>;  $\delta$ =−84.13 (s, 2F, 9-F<sub>2</sub>) ppm. **HR-MS:** (ESI+):  $m/z$  calc. for C<sub>14</sub>H<sub>19</sub>O<sub>3</sub> [M-H]<sup>+</sup>: 235.0177, found: 235.0177. **FT-IR:** (neat):  $\tilde{\nu}$  = 3089 (w), 1663 (w), 1642 (s), 1619 (w), 1566 (w), 1472 (m), 1394 (w), 1350 (m), 1295 (w), 1234 (w), 1214 (w), 1116 (s), 1046 (w), 1028 (m), 996 (m), 903 (w), 838 (m), 809 (w), 767 (w), 680 (w), 640 (w), 512 (w), 475 (w) cm<sup>−1</sup>. **m.p.:** 109 °C (Et<sub>2</sub>O).

## 2.2 Screening of chiral Lewis acids for the asymmetric conjugate addition

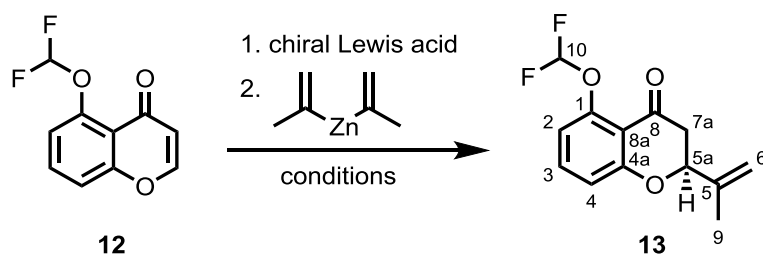

| Chiral Lewis acid                 | conditions       | Yield (ee)                              |
|-----------------------------------|------------------|-----------------------------------------|
| <br>( <i>R</i> )-Me-CBS           | THF, -78 °C, 1 h | decomposition                           |
| <br>( <i>R</i> )-ALB <sup>1</sup> | THF, 0 °C, 1 h   | decomposition                           |
|                                   | THF, -78 °C, 1 h | 48% (56%ee)                             |
|                                   | THF, -78 °C, 1 h | 67% (68%ee)                             |
|                                   | THF, -78 °C, 1 h | 50% (73%ee)                             |
|                                   | THF, -78 °C, 1 h | 87% (45%ee)                             |
|                                   | THF, -78 °C, 1 h | 70% (78%ee)<br>73% (76%ee) (gram-scale) |

All tested amino acids were tosylated according to the protocol of DeRuiter *et al.*<sup>2</sup> Benzylation of *para*-hydroxy-phenylglycine was performed according to the protocol of Behnam *et al.*<sup>3</sup> The in situ preparation of the chiral borane reagents followed a protocol of Kiyooka *et al.*<sup>4</sup>

### 2.3 (S)-5-(difluoromethoxy)-2-(prop-1-en-2-yl)chroman-4-one **13**

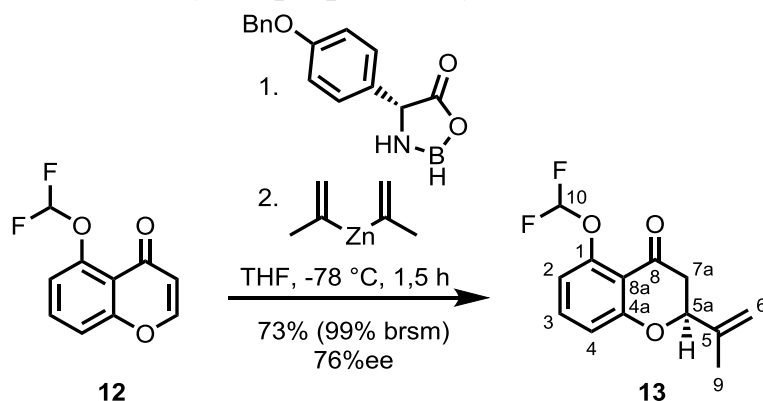

(*S*)-*N*-Ts-*para*-benzyloxy phenylglycine<sup>2,3</sup> (4.27 g, 10.4 mmol, 1.10 equiv) was dissolved in THF (260 mL) and  $\text{BH}_3 \cdot \text{THF}$ -solution (1M in THF, 11.3 mL, 11.3 mmol, 1.20 equiv) was added dropwise at room temperature. After evolution of gas had ceased (~45 min), the solution was cooled to  $-78^\circ\text{C}$  and a solution of difluoromethyl ether **12** (2.00 g, 9.43 mmol, 1.00 equiv) in THF (170 mL) was added. The reaction was stirred for 15 min and then freshly prepared diisopropenyl zinc-solution<sup>5</sup> (11.3 mmol in 170 mL THF, 1.20 equiv) was added dropwise over a period of 1 h. After complete addition, aqueous HCl (2M, 100 mL) was added at  $-78^\circ\text{C}$  and the resulting suspension was stirred for further 5 min before warming to room temperature.  $\text{H}_2\text{O}$  (100 mL) and  $\text{Et}_2\text{O}$  (100 mL) were added and the reaction was transferred into a separation funnel. The aqueous layer was extracted with  $\text{Et}_2\text{O}$  (2x100 mL), the combined organic extracts were dried over  $\text{Na}_2\text{SO}_4$  and the solvent was removed under reduced pressure. Column chromatography (silica, *n*-pentane/ $\text{EtOAc}$  4:1) gave alkenyl chromanone **13** (1.75 g, 6.88 mmol, 73%) as pale yellow oil.

**TLC:**  $R_f = 0.76$  (*n*-pentane/ $\text{EtOAc}$  2:1).  **$^1\text{H-NMR}$ :** 500 MHz,  $\text{CDCl}_3$ ;  $\delta$ =7.43 (t, 1H,  $J$ =8.3 Hz, 3-H), 6.94 (dd, 1H,  $J$ =1.0 Hz, 8.5 Hz, 4-H), 6.81 (dd, 1H,  $J$ =0.9 Hz, 8.1 Hz, 2-H), 6.57 (dd, 1H,  $J$ =74.4 Hz, 75.5 Hz, 10-H), 5.15 (dd, 1H,  $J$ =1.0 Hz, 1.9 Hz, 6- $\text{H}_a$ ), 5.07 (s, 1H, 6- $\text{H}_b$ ), 4.87 (dd, 1H,  $J$ =3.1 Hz, 12.3 Hz, 5a-H), 2.90 (dd, 1H,  $J$ =12.4 Hz, 16.3 Hz, 7a- $\text{H}_a$ ), 2.74 (dd, 1H,  $J$ =3.1 Hz, 16.3 Hz, 7a- $\text{H}_b$ ), 1.87 (s, 3H, 9- $\text{H}_3$ ) ppm.  **$^{13}\text{C-NMR}$ :** 126 MHz,  $\text{CDCl}_3$ ;  $\delta$ =190.4 (8-C), 162.7 (1-C), 150.1 (4a-C), 141.7 (5-C), 135.8 (3-C), 116.2 (4-C), 116.2 (dd,  $J$ =260.9 Hz, 10-C), 115.2 (2-C), 114.5 (6-C), 114.1 (8a-C), 80.4 (5a-C), 42.8 (7a-C), 18.3 (9-C) ppm.  **$^{19}\text{F-NMR}$ :** 282 MHz,  $\text{CDCl}_3$ ;  $\delta$ =-83.52 (dd,  $J$ =164.0 Hz, 219.9 Hz, 2F, 10- $\text{F}_2$ ) ppm. **HR-MS:** (ESI+):  $m/z$  calc. for  $\text{C}_{13}\text{H}_{12}\text{O}_3\text{F}_2\text{Na}$   $[\text{M}-\text{Na}]^+$ : 277.0647, found: 277.0643. **FT-IR:** (neat):  $\tilde{\nu} = 2978$  (w), 1694 (m), 1657 (w), 1609 (s), 1574 (w), 1469 (m), 1381 (w), 1349 (w), 1319 (w), 1275 (w), 1218 (w), 1173 (w), 1124 (s), 1038 (m), 977 (w), 912 (w), 797 (w), 765 (w), 743 (w)  $\text{cm}^{-1}$ .  **$[\alpha]$ :** -34.9 (c 1.0,  $\text{CHCl}_3$ , for a sample with 76% ee).

### Racemic sample

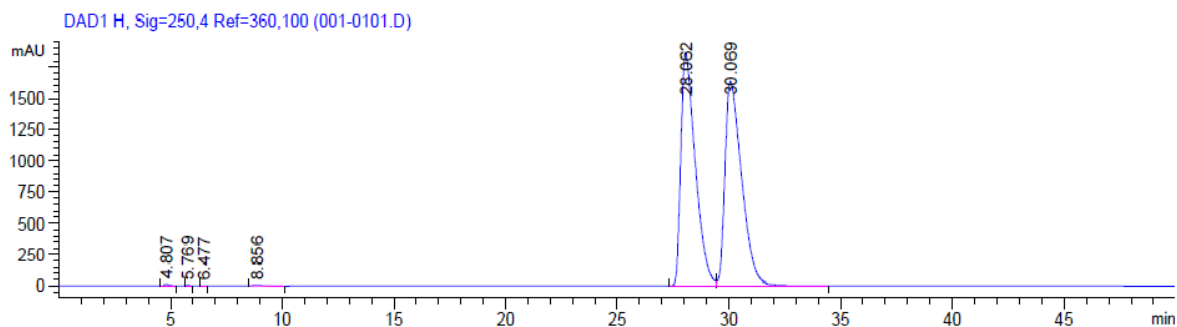

Signal 8: DAD1 H, Sig=250,4 Ref=360,100

| Peak # | RetTime [min] | Type | Width [min] | Area [mAU*s] | Height [mAU] | Area %   |
|--------|---------------|------|-------------|--------------|--------------|----------|
| 1      | 4.807         | BB   | 0.1942      | 177.35933    | 13.24793     | 0.1052   |
| 2      | 5.769         | BB   | 0.1402      | 29.75374     | 3.20819      | 0.0177   |
| 3      | 6.477         | BB   | 0.1563      | 10.74800     | 1.17938      | 6.377e-3 |
| 4      | 8.856         | BB   | 0.8425      | 265.86951    | 4.37805      | 0.1577   |
| 5      | 28.062        | BV   | 0.6666      | 8.33199e4    | 1859.99731   | 49.4323  |
| 6      | 30.069        | VB   | 0.7940      | 8.47499e4    | 1636.92615   | 50.2807  |

### Enantiomerically enriched sample

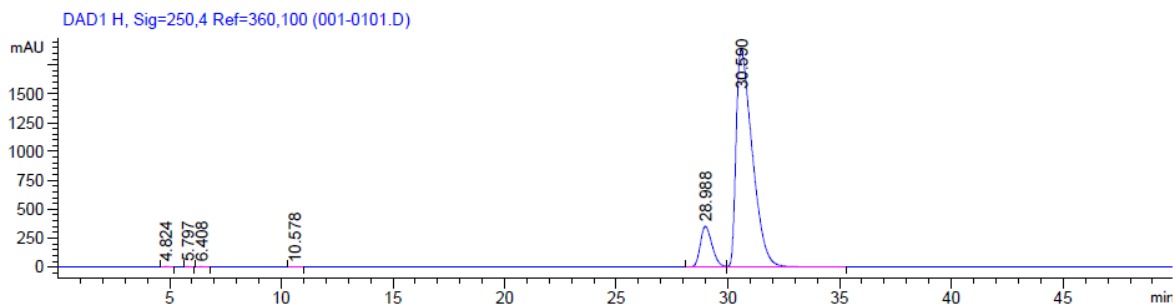

Signal 8: DAD1 H, Sig=250,4 Ref=360,100

| Peak # | RetTime [min] | Type | Width [min] | Area [mAU*s] | Height [mAU] | Area %  |
|--------|---------------|------|-------------|--------------|--------------|---------|
| 1      | 4.824         | BB   | 0.1427      | 58.19304     | 5.91969      | 0.0541  |
| 2      | 5.797         | BB   | 0.1579      | 28.91702     | 2.67972      | 0.0269  |
| 3      | 6.408         | BB   | 0.1909      | 29.34975     | 2.18230      | 0.0273  |
| 4      | 10.578        | BB   | 0.2624      | 22.36465     | 1.32823      | 0.0208  |
| 5      | 28.988        | BV   | 0.5684      | 1.28427e4    | 351.37961    | 11.9335 |
| 6      | 30.590        | VB   | 0.7617      | 9.46367e4    | 1885.12781   | 87.9375 |

HPLC conditions for the determination of the *ee* of **13**: CHIRALPAK IC<sup>®</sup> (Diacel Chemical Industries) column; *n*-hexane/*i*PrOH 99:1, flow 0.7 mL/min,  $\vartheta$ =25 °C.



## 2.4 Determination of absolute stereoconfiguration by Mosher ester analysis of 13

### Mosher ester Synthesis:<sup>6,7</sup>

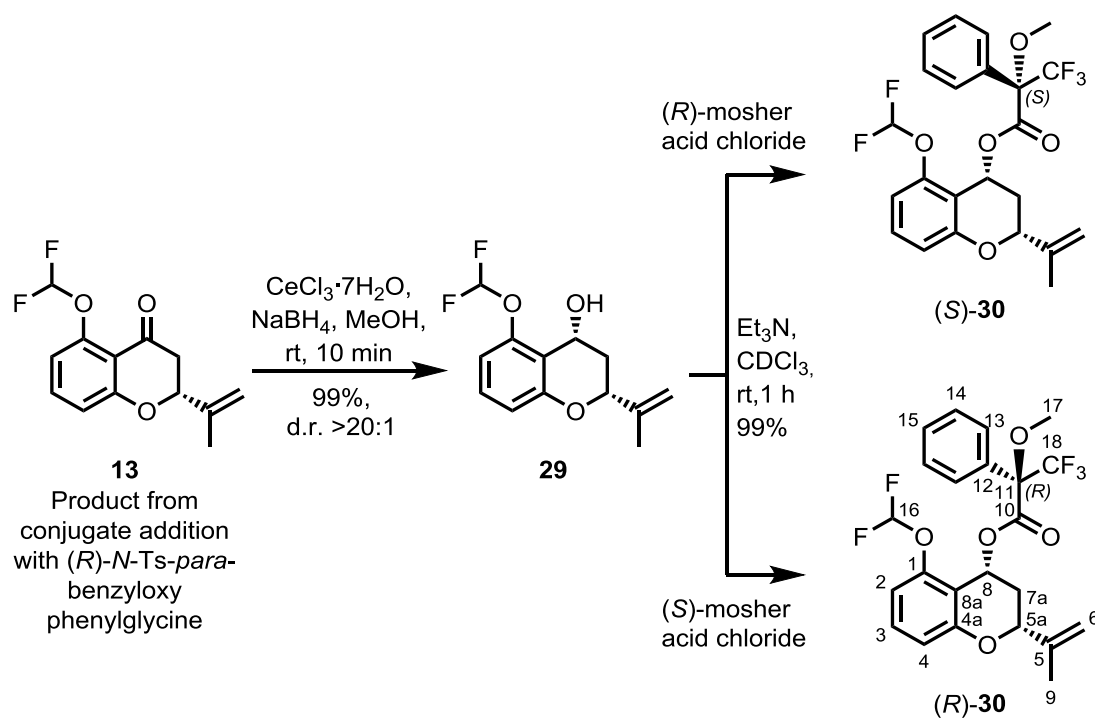

### Mosher ester analysis:<sup>7</sup>

| C-Atom       | $\delta$ ( <i>S</i> )-ester in CDCl <sub>3</sub><br>[ppm] | $\delta$ ( <i>R</i> )-ester in CDCl <sub>3</sub><br>[ppm] | $\delta(S)-\delta(R)$ |
|--------------|-----------------------------------------------------------|-----------------------------------------------------------|-----------------------|
| 2            | 6.68                                                      | 6.62                                                      | +0.06                 |
| 3            | 7.23                                                      | 7.21                                                      | +0.02                 |
| 4            | 6.78                                                      | 6.79                                                      | -0.01                 |
| 5a           | 4.51                                                      | 4.55                                                      | -0.04                 |
| 6            | 4.93                                                      | 5.01                                                      | -0.08                 |
| 7a- $\alpha$ | 2.54                                                      | 2.63                                                      | -0.07                 |
| 7a- $\beta$  | 2.04                                                      | 2.21                                                      | -0.17                 |
| 9            | 1.63                                                      | 1.79                                                      | -0.16                 |
| 16           | 6.48                                                      | 6.32                                                      | +0.16                 |

Result: The use of D-Amino acids leads to (*R*)-configuration on C-5a (and (*R*)-configuration at C-8 after substrate controlled Luche reduction<sup>6</sup>). Thus, the synthesis of (-)-preussochromone D (**3**) needed to be performed with L-amino acids.

## 2.5 (S)-5-(difluoromethoxy)-2-((S)-1-hydroxypropan-2-yl)chroman-4-one **14**

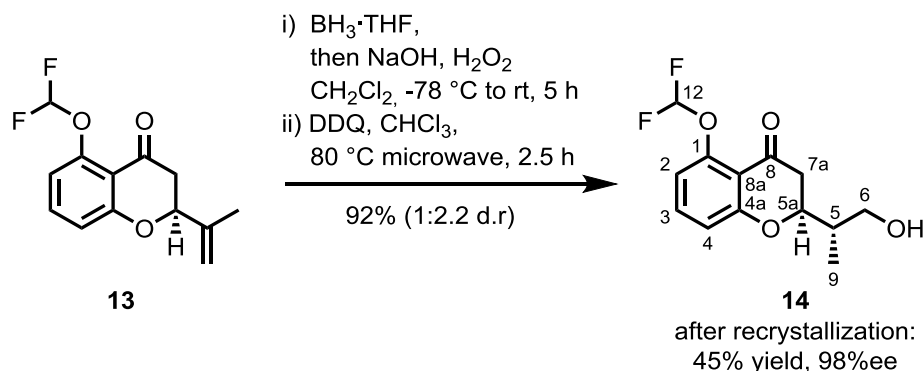

Alkene **13** (1.44 g, 5.66 mmol, 1.00 equiv) was dissolved in  $\text{CH}_2\text{Cl}_2$  (170 mL) and cooled to  $-78^\circ\text{C}$ .  $\text{BH}_3 \cdot \text{THF}$ -solution was added dropwise and the solution was allowed to warm up to rt over a period of 5 h.  $\text{NaOH}$  (3M, 5.66 mL, 17.0 mmol, 3.00 equiv) was added dropwise at  $0^\circ\text{C}$  followed by  $\text{H}_2\text{O}_2$ -solution (30%, 5.66 mL). The mixture was stirred vigorously over night, then  $\text{H}_2\text{O}$  was added until all solids went into solution. The reaction was transferred into a separation funnel and the aqueous layer was extracted with  $\text{CH}_2\text{Cl}_2$  (3x50 mL), the combined organic extracts were dried over  $\text{Na}_2\text{SO}_4$  and the solvent was removed under reduced pressure. The crude product was purified by column chromatography (silica, *n*-pentane/EtOAc 2:1) to obtain diol **14** (1.55 g, 5.66 mmol, quant, 1:2.2 d.r.) as colourless oil. The diastereomers were separated by recrystallization from  $\text{Et}_2\text{O}$  and *n*-pentane. Therefore diol **14** was solved in a minimal amount of  $\text{Et}_2\text{O}$  and pentane was added until the solution went slightly cloudly, then  $\text{Et}_2\text{O}$  was added dropwise until the solution became clear again. The cloudy solution was cooled to  $-25^\circ\text{C}$  for 18 h during which a colourless precipitate formed. The solid was filtered off, washed with ice-cold  $\text{Et}_2\text{O}$  and dried to give diastereomer **14** as single diastereomer in 98% ee (693 mg, 2.55 mmol, 45%).

**TLC:**  $R_f = 0.22$  (*n*-pentane/EtOAc 2:1).  **$^1\text{H-NMR}$ :** 500 MHz,  $\text{CDCl}_3$ ;  $\delta$ =7.42 (t, 1H,  $J$ =8.3 Hz, 3-H), 6.90 (dd, 1H,  $J$ =1.0 Hz, 8.5 Hz, 4-H), 6.81 (dd, 1H,  $J$ =0.8 Hz, 8.1 Hz, 2-H), 6.58 (dd, 1H,  $J$ =73.9 Hz, 76.0 Hz, 12-H), 4.62 (ddd, 1H,  $J$ =2.5 Hz, 4.1 Hz, 14.0 Hz, 5a-H), 3.80 (dd, 1H,  $J$ =7.3 Hz, 10.6 Hz, 6-Ha), 3.73 (dd, 1H,  $J$ =5.2 Hz, 10.7 Hz, 6-Hb), 2.89 (dd, 1H,  $J$ =13.9 Hz, 16.3 Hz, 7a-Ha), 2.60 (dd, 1H,  $J$ =2.5 Hz, 16.3 Hz, 7a-Hb), 2.00-2.07 (m, 1H, 5-H), 1.09 (d, 3H,  $J$ =7.0 Hz, 9- $\text{H}_3$ ) ppm.  **$^{13}\text{C-NMR}$ :** 126 MHz,  $\text{CDCl}_3$ ;  $\delta$  = 191.0 (8-C), 163.0 (1-C), 150.2 (4a-C), 135.6 (3-C), 116.3 (dd,  $J$ =263.7 Hz, 12-C), 116.1 (4-C), 115.2 (2-C), 114.2 (8a-C), 78.4 (5a-C), 64.4 (6-C), 41.7 (7a-C), 39.4 (5-C), 11.3 (9-C) ppm.  **$^{19}\text{F-NMR}$ :** 282 MHz,  $\text{CDCl}_3$ ;  $\delta$ =-82.71 (q, 2F,  $J$ =163.9 Hz, 12- $\text{F}_2$ ) ppm. **HR-MS:** (ESI-):  $m/z$  calc. for  $\text{C}_{13}\text{H}_{14}\text{F}_2\text{O}_4\text{Na}$   $[\text{M}-\text{Na}]^+$ : 295.0752, found 295.0750. **FT-IR:** (neat):  $\tilde{\nu}$  = 3438 (w), 2971 (w),

2887 (w), 1691 (s), 1610 (s), 1574 (w), 1470 (m), 1383 (w), 1324 (w), 1278 (w), 1224 (w), 1177 (w), 1125 (s), 1033 (s), 963 (w), 887 (w), 796 (w), 742 (w)  $\text{cm}^{-1}$ . **m.p.:** 98 °C ( $\text{Et}_2\text{O}$ ).  **$[\alpha]$ :** -80.1 (c 1.0,  $\text{CHCl}_3$ , for a sample with 98% ee).

### Racemic sample

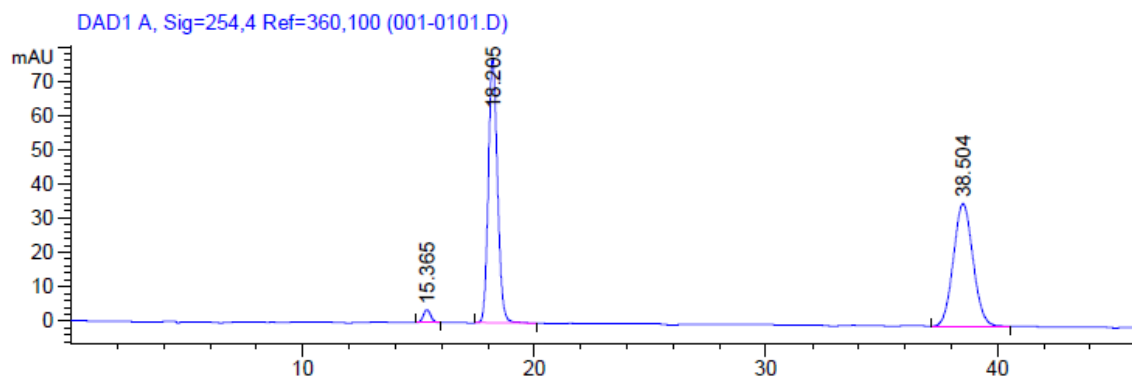

### Enantiomerically enriched sample

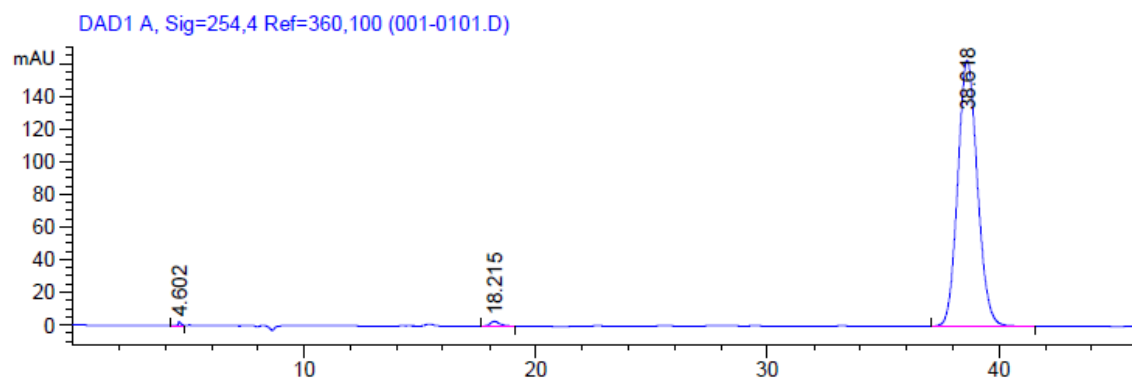

HPLC conditions for the determination of the *ee* of **14**: CHIRALPAK IC<sup>®</sup> (Diacel Chemical Industries) column; *n*-hexane/*i*PrOH 80:20, flow 0.7 mL/min,  $\vartheta$ =25 °C.

## 2.6 methyl (*R*)-2-diazo-4-((*S*)-5-(difluoromethoxy)-4-oxochroman-2-yl)-3-oxopentanoate **16**

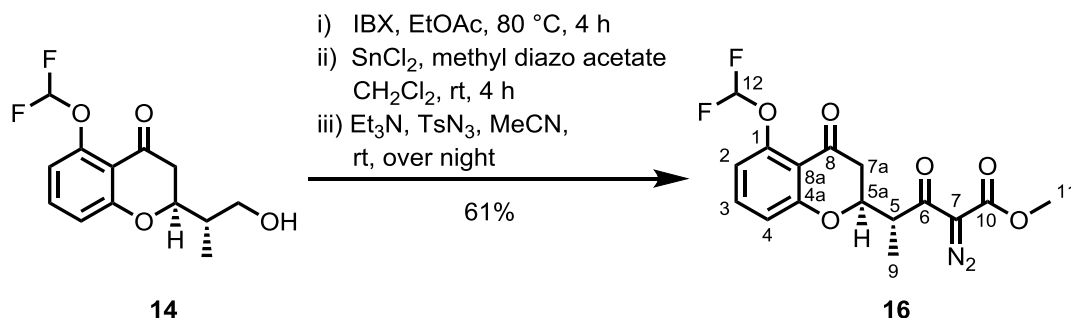

Alcohol **14** (1.18 g, 4.99 mmol, 1.00 equiv) was dissolved in EtOAc (60 mL), IBX (2.10 g, 7.49 mmol, 1.50 equiv) was added and the suspension was heated under reflux for 4 h. After cooling to room temperature, the reaction was concentrated under reduced pressure and the remnants were suspended in Et<sub>2</sub>O (50 mL) and stirred for 5 min. The suspension was filtered over a pad of Na<sub>2</sub>SO<sub>4</sub> and washed with Et<sub>2</sub>O (50 mL). The filtrate was concentrated under reduced pressure and redissolved in CH<sub>2</sub>Cl<sub>2</sub> (55 mL). SnCl<sub>2</sub> (95.0 mg, 0.449 mmol, 0.10 equiv.) was added and the reaction was stirred for 5 min, then methyl diazoacetate-solution<sup>8</sup> (9.61 M in CH<sub>2</sub>Cl<sub>2</sub>, 0.68 mL, 6.49 mmol, 1.30 equiv.) was added dropwise. The orange solution was stirred for 4 h and then concentrated under reduced pressure. The resulting slurry was taken up in MeCN (10 mL) and filtered over a syringe filter. The filter was washed with MeCN (2x20 mL) and the filtrate was cooled to 0 °C. TsN<sub>3</sub> (1.15 mL, 7.49 mmol, 1.50 equiv) and Et<sub>3</sub>N (0.76 mL, 5.50 mmol, 1.10 equiv) were added and the reaction was stirred over night at room temperature. The reaction was concentrated under reduced pressure and the crude product was purified by column chromatography (silica, *n*-pentane/EtOAc 4:1) to obtain  $\alpha$ -diazo- $\beta$ -ketoester **16** (1.01 g, 3.04 mmol, 61%) as pale yellow crystals.

**TLC:** R<sub>f</sub> = 0.68 (*n*-pentane/EtOAc 2:1). **<sup>1</sup>H-NMR:** 500 MHz, CDCl<sub>3</sub>;  $\delta$  = 7.42 (t, 1H, *J* = 8.3 Hz, 3-H), 6.90 (dd, 1H, *J* = 1.0 Hz, 8.5 Hz, 4-H), 6.81 (dd, 1H, *J* = 0.9 Hz, 8.1 Hz, 2-H), 6.57 (t, 1H, *J* = 75.0 Hz, 12-H), 4.70 (ddd, 1H, *J* = 4.1 Hz, 7.1 Hz, 11.0 Hz, 5a-H), 4.04 (p, 1H, *J* = 6.9 Hz, 5-H), 3.84 (s, 3H, 11-H<sub>3</sub>), 2.71-2.84 (m, 2H, 7a-H<sub>2</sub>), 1.33 (d, 3H, *J* = 6.9 Hz, 9-H<sub>3</sub>) ppm. **<sup>13</sup>C-NMR:** 126 MHz, CDCl<sub>3</sub>;  $\delta$  = 192.7 (6-C), 190.0 (8-C), 162.5 (4a-C), 161.4 (10-C), 150.2 (1-C), 135.7 (3-C), 116.3 (t, *J* = 260.4 Hz, 12-C), 116.3 (4-C), 115.5 (2-C), 114.2 (8a-C), 78.1 (5a-C), 76.6 (7-C), 52.6 (11-C), 45.2 (5-C), 42.0 (7a-C), 12.9 (9-C) ppm. **<sup>19</sup>F-NMR:** 282 MHz, CDCl<sub>3</sub>;  $\delta$  = -82.8 (d, 2F, *J* = 5.0 Hz, 12-F<sub>2</sub>) ppm. **HR-MS:** (ESI<sup>+</sup>): *m/z* calc. for C<sub>16</sub>H<sub>14</sub>F<sub>2</sub>N<sub>2</sub>O<sub>6</sub>Na [M-Na]<sup>+</sup>: 391.0712, found 391.0702. **FT-IR:** (neat):  $\tilde{\nu}$  = 2958 (w), 2149

(m), 1697 (s), 1648 (m), 1610 (s), 1575 (w), 1469 (m), 1440 (m), 1381 (m), 1308 (s), 1210 (m), 1125 (s), 1040 (m), 997 (m), 878 (w), 804 (w), 741 (w)  $\text{cm}^{-1}$ . **m.p.:** 120 °C ( $\text{Et}_2\text{O}$ ).  **$[\alpha]$ :** -65.2 (c 1.0,  $\text{CHCl}_3$ , for a sample with 98% ee).

## 2.7 methyl (3*R*,4*S*)-2-diazo-4-((*S*)-5-(difluoromethoxy)-4-oxochroman-2-yl)-3-hydroxypentanoate **18**

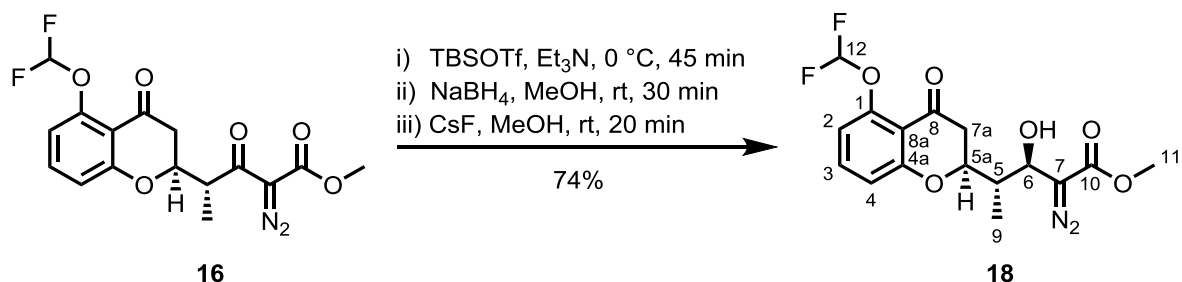

$\alpha$ -Diazo- $\beta$ -ketoester **16** (1.29 g, 3.50 mmol, 1.00 equiv) was dissolved in  $\text{CH}_2\text{Cl}_2$  (65 mL) and TBSOTf (0.89 mL, 3.85 mmol, 1.10 equiv) and  $\text{Et}_3\text{N}$  (0.53 mL, 3.85 mmol, 1.10 equiv) were added at 0 °C. The reaction was stirred for 45 min, then MeOH (5 mL) was added and all volatile components were removed under reduced pressure. The resulting slurry was redissolved in MeOH (65 mL) and  $\text{NaBH}_4$  (2.65 g, 70.0 mmol, 20.0 equiv) was added in 4 portions over 30 min. Water (100 mL) was added and the aqueous layer was extracted with  $\text{CH}_2\text{Cl}_2$  (3x100 mL). The organic extracts were combined and a saturated solution of CsF in MeOH (100 mL) was added. After stirring for 20 min, the solution was washed with water (50 mL) and brine (20 mL) and then dried over  $\text{Na}_2\text{SO}_4$ . The solvent was removed under reduced pressure and the crude product was purified by column chromatography (silica, *n*-pentane/EtOAc 8:1, no dryload since the crude product is acid labile and eliminates the diazo moiety under dryload conditions) and recrystallized from  $\text{CH}_2\text{Cl}_2$  and *n*-pentane to obtain  $\alpha$ -diazo- $\beta$ -hydroxyester **18** (956 mg, 2.58 mmol, 74%) as pale yellow crystals.

**TLC:**  $R_f$  = 0.49 (*n*-pentane/EtOAc 2:1).  **$^1\text{H-NMR}$ :** 500 MHz,  $\text{CDCl}_3$ ;  $\delta$ =7.41 (t, 1H,  $J$ =8.3 Hz, 3-H), 6.90 (dd, 1H,  $J$ =0.9 Hz, 8.5 Hz, 4-H), 6.79 (d, 1H,  $J$ =8.0 Hz, 2-H), 6.56 (dd, 1H,  $J$ =73.7 Hz, 76.1 Hz, 12-H), 4.95 (dt, 1H,  $J$ =2.3 Hz, 14.5 Hz, 5a-H), 4.76 (dd, 1H,  $J$ =1.9 Hz, 9.6 Hz, 6-H), 3.79 (s, 3H, 11- $\text{H}_3$ ), 2.92 (dd, 2H,  $J$ =14.6 Hz, 16.2 Hz, 7a- $\text{H}_2$ ), 2.48 (dd, 1H,  $J$ =2.3 Hz, 16.2 Hz, 6-OH), 1.95-2.09 (m, 1H, 5-H), 1.07 (s, 3H,  $J$ =7.0 Hz, 9- $\text{H}_3$ ) ppm.  **$^{13}\text{C-NMR}$ :** 75 MHz,  $\text{CDCl}_3$ ;  $\delta$ =190.7 (8-C), 166.8 (4a-C), 162.9 (10-C), 150.2 (1-C), 135.6 (3-C), 116.2 (dd,  $J$ =260.3 Hz, 261.7 Hz, 12-C), 116.1 (4-C), 115.3 (2-C), 114.2 (8a-C), 112.8 (7-C), 76.4 (5a-C), 68.7 (6-C), 52.3 (11-C), 41.9 (7a-C), 41.3 (5-C), 10.1 (9-C) ppm.  **$^{19}\text{F-NMR}$ :** 282 MHz,  $\text{CDCl}_3$ ;  $\delta$ =-82.8 (q, 2F,  $J$ =164.0 Hz, 12- $\text{F}_2$ ) ppm. **HR-MS:** (ESI+):  $m/z$  calc. for  $\text{C}_{16}\text{H}_{16}\text{F}_2\text{N}_2\text{O}_6\text{Na}$   $[\text{M-Na}]^+$ : 393.0869, found 393.0878. **FT-IR:** (neat):  $\tilde{\nu}$ =3468 (w), 2955 (w), 2097 (m), 1747 (w), 1689 (s), 1609 (m), 1574 (w), 1470 (m), 1441 (m), 1383 (m), 1358 (m), 1323 (m), 1278 (m), 1228 (m), 1190 (m), 1120 (s), 1028 (s), 962 (w), 797 (w), 768 (w), 744 (w)  $\text{cm}^{-1}$ . **m.p.:** 132 °C ( $\text{Et}_2\text{O}$ ).  **$[\alpha]$ :** -56.8 (c 1.0,  $\text{CHCl}_3$ , for a sample with 98%ee).

**2.8 methyl (1*S*,2*R*,3*S*,3*aR*,9*aR*)-8-(difluoromethoxy)-1,2-dihydroxy-3-methyl-9-oxo-1,2,3,3*a*,9,9*a*-hexahydrocyclopenta[*b*]chromene-1-carboxylate **19****

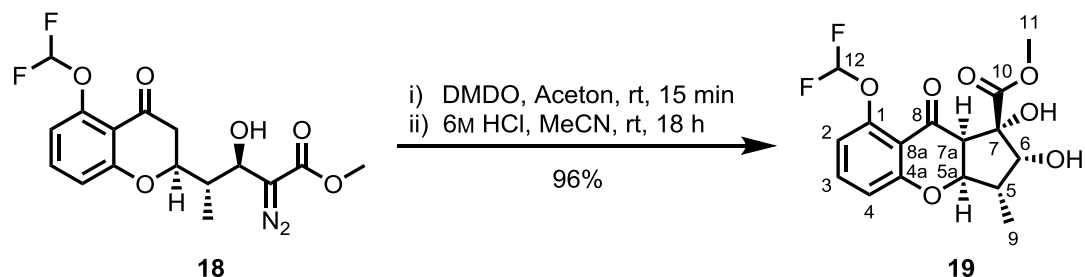

$\alpha$ -Diazo- $\beta$ -hydroxyester **18** (66.0 mg, 0.184 mmol, 1.00 equiv) was dissolved in DMSO-solution<sup>9</sup> (0.055M in acetone, 6.7 mL, 2.00 equiv) and stirred at room temperature for 15 min. All volatiles were removed under reduced pressure and the remaining slurry was dried under vacuum for 1 h at 50 °C. The resulting yellow oil was dissolved in MeCN (5 mL) and HCl (6M, 0.05 mL, 0.30 mmol, 1.63 equiv) was added. The solution was stirred for 24 h, then diluted with H<sub>2</sub>O (10 mL), extracted with EtOAc (3x10 mL) and dried over Na<sub>2</sub>SO<sub>4</sub>. The crude product was purified by column chromatography (silica, *n*-pentane/EtOAc 2:1) to obtain diol **19** (63.0 mg, 0.177 mmol, 96%) as white solid.

**TLC:**  $R_f$  = 0.38 (*n*-pentane/EtOAc 1:1). **<sup>1</sup>H-NMR:** 500 MHz, CDCl<sub>3</sub>;  $\delta$ =7.44 (t, 1H,  $J$ =8.3 Hz, 3-H), 6.90 (dd, 1H,  $J$ =0.9 Hz, 8.4 Hz, 4-H), 6.84 (dd, 1H,  $J$ =0.8 Hz, 8.1 Hz, 2-H), 6.55 (dd, 1H,  $J$ =73.6 Hz, 75.6 Hz, 12-H), 4.74 (dd, 1H,  $J$ =3.6 Hz, 7.7 Hz, 5a-H), 4.38 (s, br, 1H, 6-OH), 4.27 (s, 1H, 7-OH), 3.57 (s, 3H, 11-H<sub>3</sub>), 3.46 (d, 1H,  $J$ =7.7 Hz, 7a-H), 2.92 (d, 1H,  $J$ =4.5 Hz, 6-H), 2.75 (ttd, 1H,  $J$ =3.7 Hz, 7.4 Hz, 11.0 Hz, 5-H), 1.17 (d, 3H,  $J$ =7.4 Hz, 9-H<sub>3</sub>) ppm. **<sup>13</sup>C-NMR:** 125 MHz, CDCl<sub>3</sub>;  $\delta$ =189.8 (8-C), 173.4 (4a-C), 162.5 (10-C), 149.6 (1-C), 135.9 (3-C), 116.5 (8a-C), 116.0 (dd,  $J$ =261.4 Hz, 262.4 Hz, 12-C), 115.7 (4-C), 115.6 (2-C), 83.8 (7a-C), 83.6 (7-C), 76.4 (5a-C), 59.9 (6-C), 53.3 (11-C), 43.9 (5-C), 10.7 (9-C) ppm. **<sup>19</sup>F-NMR:** 282 MHz, CDCl<sub>3</sub>;  $\delta$ =-82.5 (d, 2F,  $J$ =17.1 Hz, 12-F<sub>2</sub>) ppm. **HR-MS:** (ESI<sup>+</sup>):  $m/z$  calc. for C<sub>16</sub>H<sub>16</sub>F<sub>2</sub>O<sub>7</sub>Na [M-Na]<sup>+</sup>: 381.0756, found 381.0767. **FT-IR:** (neat):  $\tilde{\nu}$ =3466 (w), 2955 (w), 1737 (m), 1680 (m), 1609 (s), 1576 (w), 1471 (m), 1383 (w), 1325 (w), 1278 (w), 1244 (w), 1212 (w), 1119 (s), 1039 (m), 966 (w), 914 (w), 826 (w), 763 (w), 738 (w) cm<sup>-1</sup>. **m.p.:** 128 °C (Et<sub>2</sub>O). **[ $\alpha$ ]:** -8.7 (c 0.25, CHCl<sub>3</sub>, for a sample with 98% ee).

**2.9 methyl (1*S*,2*R*,3*S*,3*aR*,9*aR*)-1,2,8-trihydroxy-3-methyl-9-oxo-1,2,3,3*a*,9,9*a*-hexahydrocyclopenta[*b*]chromene-1-carboxylate **20****

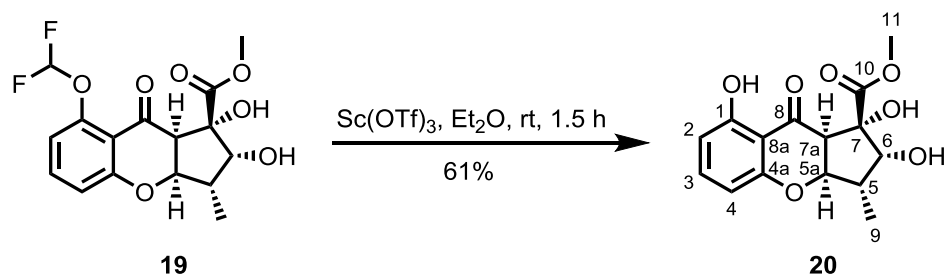

Difluoromethyl ether **19** (23.0 mg, 0.0642 mmol, 1.00 equiv) was solved in Et<sub>2</sub>O (3 mL) and Sc(OTf)<sub>3</sub> (32.0 mg, 0.0642 mmol, 1.00 equiv) was added in one portion. The yellow solution was stirred for 1.5 h at room temperature, then water was added (5 mL). The aqueous layer was extracted with Et<sub>2</sub>O (3x5 mL) and the combined organic extracts were dried over Na<sub>2</sub>SO<sub>4</sub> and concentrated under reduced pressure. The crude product was purified by column chromatography (silica, *n*-pentane/EtOAc 2:1) 7-*epi*-preussochromone D (12.0 mg, 0.0389 mmol, 61%).

**TLC:** R<sub>f</sub> = 0.36 (*n*-pentane/EtOAc 1:1). **<sup>1</sup>H-NMR:** 500 MHz, CDCl<sub>3</sub>; δ = 11.58 (s, 1H, 1-OH), 7.37 (t, 1H, *J* = 8.3 Hz, 3-H), 6.50 (dd, 1H, *J* = 0.9 Hz, 8.4 Hz, 4-H), 6.42 (dd, 1H, *J* = 0.9 Hz, 8.2 Hz, 2-H), 4.75 (dd, 1H, *J* = 3.2 Hz, 7.1 Hz, 5a-H), 4.49 (dd, 1H, *J* = 6.2 Hz, 7.8 Hz, 6-H), 4.28 (s, 1H, 7-OH), 3.54 (s, 3H, 11-H<sub>3</sub>), 3.42 (d, 1H, *J* = 7.1 Hz, 7a-H), 2.81 (d, 1H, *J* = 8.0 Hz, 6-OH), 2.77 (tdd, 1H, *J* = 3.3 Hz, 7.5 Hz, 13.4 Hz, 5-H), 1.15 (s, 3H, *J* = 7.5 Hz, 9-H<sub>3</sub>) ppm.

**<sup>13</sup>C-NMR:** 125 MHz, CDCl<sub>3</sub>; δ = 196.4 (8-C), 173.2 (4a-C), 162.1 (1-C), 160.8 (10-C), 139.1 (3-C), 109.8 (4-C), 108.3 (8a-C), 107.8 (2-C), 83.5 (5a-C), 82.7 (7-C), 76.2 (7a-C), 57.7 (6-C), 53.4 (11-C), 44.2 (5-C), 10.4 (9-C) ppm. **HR-MS:** (ESI<sup>+</sup>): *m/z* calc. for C<sub>15</sub>H<sub>16</sub>O<sub>7</sub>Na [M-Na]<sup>+</sup>: 331.0797, found 331.0788. **FT-IR:** (neat):  $\tilde{\nu}$  = 3466 (w), 2926 (w), 2854 (w), 1740 (m), 1636 (s), 1577 (w), 1462 (s), 1366 (m), 1295 (w), 1222 (s), 1160 (w), 1114 (m), 1078 (w), 1057 (w), 995 (w), 825 (w), 798 (w), 726 (w) cm<sup>-1</sup>. **m.p.:** 156 °C (Et<sub>2</sub>O). **[α]<sub>D</sub>:** -16.3 (c 0.1, CHCl<sub>3</sub>, for a sample with 98% ee).



## 2.10 methyl (3*S*,4*S*)-2-diazo-4-((*S*)-5-(difluoromethoxy)-4-oxochroman-2-yl)-3-hydroxypentanoate **21**

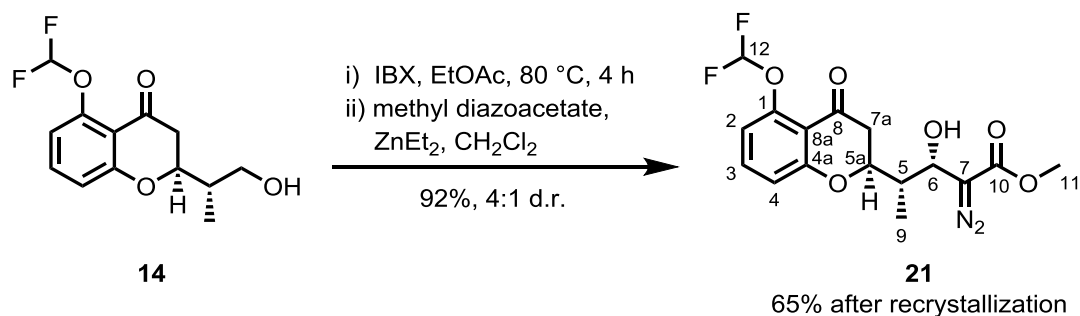

Alcohol **14** (1.66 g, 6.10 mmol, 1.00 equiv) was dissolved in EtOAc (100 mL), IBX (3.42 g, 12.2 mmol, 2.00 equiv) was added and the suspension was heated under reflux for 4 h. After cooling to room temperature, the reaction was concentrated under reduced pressure and the remnants were suspended in Et<sub>2</sub>O (100 mL) and stirred for 5 min. The suspension was filtered over a pad of Na<sub>2</sub>SO<sub>4</sub> and washed with Et<sub>2</sub>O (50 mL). The solvent was removed under reduced pressure and the remnants were dissolved in CH<sub>2</sub>Cl<sub>2</sub> (30 mL) and cooled to -78 °C. In another flask, methyl diazoacetate<sup>8</sup> (11.55M in CH<sub>2</sub>Cl<sub>2</sub>, 0.63 mL, 7.32 mmol, 1.20 equiv) was dissolved in CH<sub>2</sub>Cl<sub>2</sub> and cooled to -78 °C before diethylzinc-solution (1M in heptane, 7.32 mL, 7.32 mmol, 1.20 equiv.) was added dropwise. The solution was allowed to warm to -50 °C, then the previously prepared aldehyde-solution was added via a cannula. The reaction mixture was allowed to warm to room temperature and stirred for further 2 h. Then, the whole mixture was directly poured onto a wide column and purified by column chromatography (silica, *n*-pentane/EtOAc 4:1) to obtain  $\alpha$ -diazo- $\beta$ -hydroxyester **21** (2.08 g, 5.63 mmol, 92%, 4:1 d.r.) as yellow powder. The diastereomers were separated via recrystallization from small amounts of Et<sub>2</sub>O at room temperature to give **21** as single diastereomer (1.47 g, 3.97 mmol, 65%).

**TLC:** R<sub>f</sub> = 0.44 (*n*-pentane/EtOAc 2:1). **<sup>1</sup>H-NMR:** 300 MHz, CDCl<sub>3</sub>;  $\delta$ =7.43 (t, 1H, *J*=8.3 Hz, 3-H), 6.87 (dd, 1H, *J*=1.0 Hz, 8.5 Hz, 4-H), 6.83 (dd, 1H, *J*=0.9 Hz, 8.1 Hz, 2-H), 6.56 (dd, 1H, *J*=65.8 Hz, 67.5 Hz, 12-H), 4.78 (dd, 1H, *J*=5.9 Hz, 6.5 Hz, 6-H), 4.61 (dt, 1H, *J*=2.9 Hz, 14.1 Hz, 5a-H), 3.77 (s, 3H, 11-H<sub>3</sub>), 2.95 (dd, 1H, *J*=14.1 Hz, 16.3 Hz, 7a-H<sub>a</sub>), 2.75 (d, 1H, *J*=5.3 Hz, 6-OH), 2.55 (dd, 1H, *J*=2.4 Hz, 16.3 Hz, 7a-H<sub>b</sub>), 2.18 (pd, 1H, *J*=3.1 Hz, 6.9 Hz, 5-H), 1.23 (d, 3H, *J*=7.0 Hz, 9-H<sub>3</sub>) ppm. **<sup>13</sup>C-NMR:** 75 MHz, CDCl<sub>3</sub>;  $\delta$ =190.5 (8-C), 166.7 (4a-C), 162.6 (10-C), 150.2 (1-C), 150.2 (7-C), 135.8 (3-C), 116.2 (t, *J*=261.2, 12-C), 116.0 (4-C), 115.4 (2-C), 114.2 (8a-C), 78.7 (5a-C), 68.4 (6-C), 52.2 (11-C), 41.8 (7a-C), 41.8 (5-C), 9.6 (9-C) ppm. **<sup>19</sup>F-NMR:** 282 MHz, CDCl<sub>3</sub>;  $\delta$ =-82.7 (q, 2F, *J*=163.8 Hz, 12-F<sub>2</sub>) ppm.

**HR-MS:** (ESI+):  $m/z$  calc. for  $C_{16}H_{16}F_2N_2O_6Na$   $[M-Na]^+$ : 393.0869, found 393.0868. **FT-IR:** (neat):  $\tilde{\nu}$  = 3472 (w), 2957 (w), 1730 (m), 1690 (m), 1608 (m), 1575 (w), 1469 (m), 1384 (w), 1321 (m), 1275 (m), 1222 (m), 1180 (m), 1118 (s), 1032 (s), 963 (m), 911 (m), 795 (m), 731 (s), 648 (w), 581 (w), 555 (w), 521 (w)  $cm^{-1}$ . **m.p.:** 130 °C (Et<sub>2</sub>O). **[ $\alpha$ ]:** -102.6 (c 1.0, CHCl<sub>3</sub>, for a sample with 98% ee).

## 2.11 methyl (1S,2S,3S,3aR,9aR)-8-(difluoromethoxy)-1,2-dihydroxy-3-methyl-9-oxo-1,2,3,3a,9,9a-hexahydrocyclopenta[b]chromene-1-carboxylate **22**

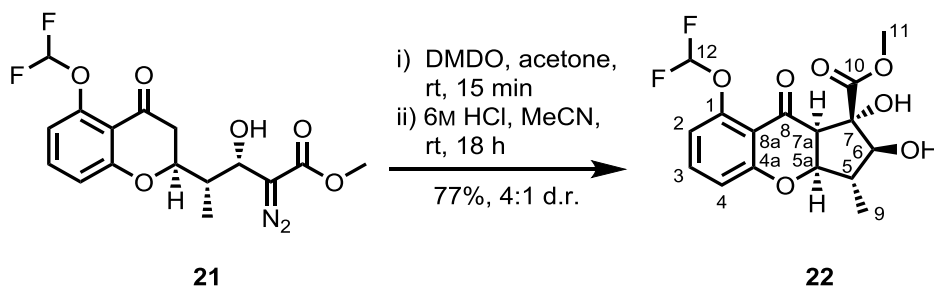

$\alpha$ -Diazo- $\beta$ -hydroxyester **21** (180 mg, 0.486 mmol, 1.00 equiv) was dissolved in DMSO-solution<sup>9</sup> (0.055M in acetone, 20.0 mL, 2.26 equiv.) and stirred at room temperature for 15 min. All volatile components were removed under reduced pressure and the remaining slurry was dried at 50 °C under vacuum for 1 h. The oily remnants were dissolved in MeCN (20 mL) and HCl (6M, 1.0 mL) was added. The aqueous solution was stirred over night and then water (10 mL) and CH<sub>2</sub>Cl<sub>2</sub> (10 mL) were added. The aqueous layer was extracted with CH<sub>2</sub>Cl<sub>2</sub> (2x20 mL) and the combined organic extracts were dried over Na<sub>2</sub>SO<sub>4</sub>. The solvent was removed under reduced pressure and the crude product was purified by column chromatography (silica, *n*-pentane/EtOAc 2:1) to obtain *trans*-diol **22** (134 mg, 0.374 mmol, 77%, 4:1 d.r.) as colourless oil.

**TLC:**  $R_f$  = 0.28 (*n*-pentane/EtOAc 1:1). **<sup>1</sup>H-NMR:** 500 MHz, CDCl<sub>3</sub>;  $\delta$ =7.42 (t, 1H,  $J$ =8.3 Hz, 3-H), 6.89 (dd, 1H,  $J$ =0.9 Hz, 8.5 Hz, 4-H), 6.81 (d, 1H,  $J$ =7.7 Hz, 2-H), 6.55 (dd, 1H,  $J$ =72.9 Hz, 76.5 Hz, 12-H), 4.64 (dd, 1H,  $J$ =6.9 Hz, 10.4 Hz, 5a-H), 4.31 (s, br, 1H, 7-OH), 3.82 (d, 1H,  $J$ =10.5 Hz, 6-H), 3.67 (s, 3H, 11-H<sub>3</sub>), 3.39 (d, 1H,  $J$ =10.4 Hz, 7a-H), 3.24 (s, br, 1H, 6-OH), 2.65 (dp, 1H,  $J$ =6.8 Hz, 10.6 Hz, 5-H), 1.32 (d, 3H,  $J$ =6.8 Hz, 9-H<sub>3</sub>) ppm. **<sup>13</sup>C-NMR:** 126 MHz, CDCl<sub>3</sub>;  $\delta$ =189.8 (8-C), 172.3 (4a-C), 161.9 (10-C), 149.5 (1-C), 135.8 (3-C), 116.5 (8a-C), 116.2 (dd,  $J$ =260.0 Hz, 262.8 Hz, 12-C), 115.9 (4-C), 115.3 (2-C), 86.6 (7a-C), 83.0 (7-C), 81.5 (5a-C), 57.8 (6-C), 53.0 (11-C), 44.5 (5-C), 16.0 (9-C) ppm. **<sup>19</sup>F-NMR:** 282 MHz, CDCl<sub>3</sub>;  $\delta$ =-82.6 (dd, 2F,  $J$ =164.5 Hz, 411.2 Hz, 12-F<sub>2</sub>) ppm. **HR-MS:** (ESI-):  $m/z$  calc. for C<sub>16</sub>H<sub>15</sub>F<sub>2</sub>O<sub>7</sub>Na [M-H]: 357.0791, found 357.0796. **FT-IR:** (neat):  $\tilde{\nu}$  =3473 (w), 2961 (w), 1738 (m), 1681 (m), 1610 (s), 1577 (w), 1472 (m), 1378 (w), 1327 (w), 1284 (w), 1257 (w), 1220 (m), 1123 (s), 1048 (m), 972 (w), 912 (w), 827 (w), 795 (w), 734 (w) cm<sup>-1</sup>. [ $\alpha$ ]: -21.3 (c 1.0, CHCl<sub>3</sub>, for a sample with 98% ee).

**2.12 methyl (1*R*,2*S*,3*S*,3*aR*,9*aR*)-8-(difluoromethoxy)-1,2-dihydroxy-3-methyl-9-oxo-1,2,3,3*a*,9,9*a*-hexahydrocyclopenta[*b*]chromene-1-carboxylate **23****

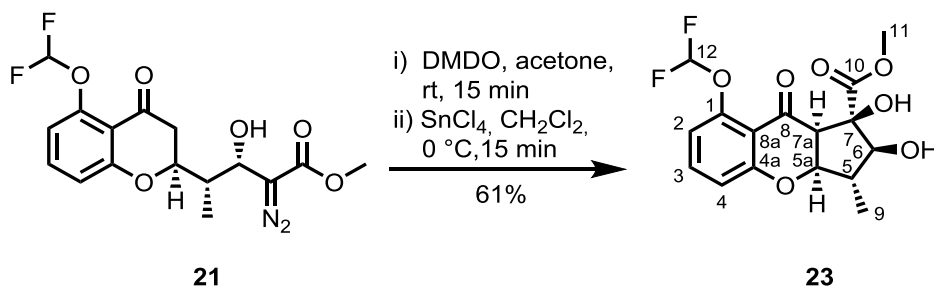

$\alpha$ -Diazo- $\beta$ -hydroxyester **21** (290 mg, 0.783 mmol, 1.00 equiv) was dissolved in DMDO-solution<sup>9</sup> (0.055M in acetone, 30.0 mL, 2.10 equiv) and stirred at room temperature for 15 min. All volatile components were removed under reduced pressure and the remaining slurry was dried at 50 °C under vacuum for 1 h. The oily remnants were dissolved in CH<sub>2</sub>Cl<sub>2</sub> (60 mL) and SnCl<sub>4</sub> (0.37 mL, 3.13 mmol, 4.00 equiv.) was added dropwise at 0 °C. The yellow solution was stirred for 15 min and then water was added (20 mL) at 0 °C. The aqueous layer was extracted with CH<sub>2</sub>Cl<sub>2</sub> (2x20 mL) and the combined organic extracts were dried over Na<sub>2</sub>SO<sub>4</sub>. The solvent was removed under reduced pressure and the crude product was purified by column chromatography (silica, *n*-pentane/EtOAc 2:1) to obtain *cis*-diol **23** (170 mg, 0.475 mmol, 61%) as colourless powder.

**TLC:** *R*<sub>f</sub> = 0.32 (*n*-pentane/EtOAc 2:1). **<sup>1</sup>H-NMR:** 500 MHz, CDCl<sub>3</sub>;  $\delta$ =7.42 (t, 1H, *J*=8.3 Hz, 3-H), 6.88 (dd, 1H, *J*=0.9 Hz, 8.5 Hz, 4-H), 6.81 (d, 1H, *J*=8.1 Hz, 2-H), 6.57 (dd, 1H, *J*=71.8 Hz, 77.5 Hz, 12-H), 4.57 (dd, 1H, *J*=4.1 Hz, 8.0 Hz, 5a-H), 3.92 (s, 3H, 11-H<sub>3</sub>), 3.87 (dd, 1H, *J*=9.0 Hz, 11.5 Hz, 6-H), 3.86 (s, 1H, 7-OH), 3.52 (d, 1H, *J*=8.0 Hz, 7a-H), 2.47 (dq, 1H, *J*=4.1 Hz, 7.2 Hz, 14.3 Hz, 5-H), 2.38 (d, 1H, *J*=11.6 Hz, 6-OH), 1.38 (d, 3H, *J*=7.2 Hz, 9-H<sub>3</sub>) ppm. **<sup>13</sup>C-NMR:** 126 MHz, CDCl<sub>3</sub>;  $\delta$ =187.9 (8-C), 173.2 (4a-C), 162.3 (10-C), 149.8 (1-C), 136.1 (3-C), 116.5 (8a-C), 116.1 (dd, *J*=259.0 Hz, 263.4 Hz, 12-C), 115.7 (4-C), 115.2 (2-C), 83.5 (7a-C), 82.7 (7-C), 81.4 (5a-C), 55.5 (6-C), 54.0 (11-C), 48.7 (5-C), 16.5 (9-C) ppm. **<sup>19</sup>F-NMR:** 282 MHz, CDCl<sub>3</sub>;  $\delta$ =−82.6 (d, 2F, *J*=164.4 Hz, 398.7 Hz, 12-F<sub>2</sub>) ppm. **HR-MS:** (ESI<sup>+</sup>): *m/z* calc. for C<sub>16</sub>H<sub>16</sub>F<sub>2</sub>O<sub>7</sub>Na [M-Na]<sup>+</sup>: 381.0756, found 381.0747. **FT-IR:** (neat):  $\tilde{\nu}$ =3481 (w), 2961 (w), 1735 (m), 1682 (m), 1610 (s), 1575 (w), 1472 (m), 1378 (w), 1328 (w), 1268 (m), 1239 (w), 1124 (s), 1042 (m), 962 (w), 796 (w), 738 (w) cm<sup>−1</sup>. **m.p.:** 159 °C (CHCl<sub>3</sub>). **[ $\alpha$ ]:** −34.8 (c 1.0, CHCl<sub>3</sub>, for a sample with 98% ee).

**2.13 methyl (1*R*,2*R*,3*S*,3*aR*,9*aR*)-8-(difluoromethoxy)-1,2-dihydroxy-3-methyl-9-oxo-1,2,3,3*a*,9,9*a*-hexahydrocyclopenta[*b*]chromene-1-carboxylate **24****

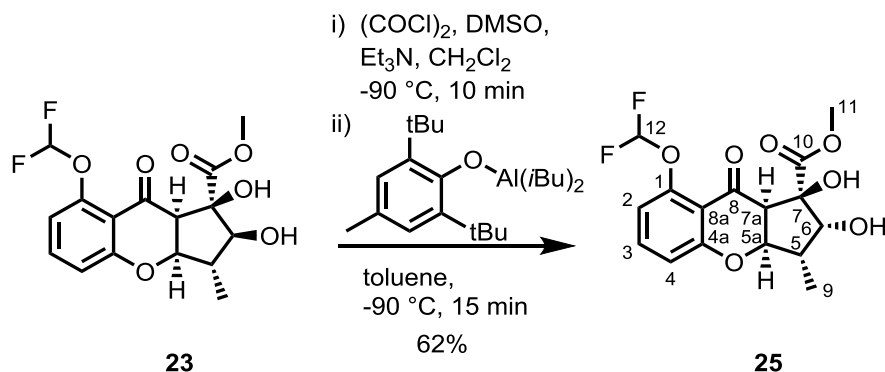

DMSO (0.06 mL, 0.846 mmol, 11.6 equiv) was added dropwise at -90 °C to a solution of (COCl)<sub>2</sub> (0.03 mL, 0.350 mmol 4.82 equiv) in CH<sub>2</sub>Cl<sub>2</sub>. The solution was stirred for 20 min and then *trans*-diol **23** (26.0 mg, 0.0726 mmol, 1.00 equiv) in CH<sub>2</sub>Cl<sub>2</sub> (1 mL) was added via canula. The reaction was stirred for 5 min before Et<sub>3</sub>N (0.12 mL, 87.6 mmol, 11.9 equiv) was added dropwise. After stirring for further 5 min the reaction was stopped by addition of HOAc (0.2 mL) and allowed to warm to room temperature. Water (5 mL) was added and the aqueous layer was extracted with CH<sub>2</sub>Cl<sub>2</sub> (2x5 mL). The combined organic extracts were dried over Na<sub>2</sub>SO<sub>4</sub>, then the solvent was removed under reduced pressure. The crude ketone was dissolved in toluene (1.5 mL) and cooled to -90 °C. In another flask, DIBAH-solution (1M in toluene, 0.14 mL, 0.140 mmol, 1.93 equiv) was added dropwise at 0 °C to a solution of 2,6-di-tert-butyl-4-methylphenol (32.0 mg, 0.145 mmol, 2.00 equiv) in toluene (2 mL). The solution was stirred for 1 h and then cooled to -90 °C. The previously prepared ketone-solution was added via cannula and stirred for 15 min at -90 °C. Then HCl (1M, 1 mL) was added and the reaction was warmed to room temperature. The aqueous layer was extracted with Et<sub>2</sub>O (2x5 mL) and the combined organic extracts were dried over Na<sub>2</sub>SO<sub>4</sub>. The solvent was removed under reduced pressure and the crude product was purified by column chromatography (silica, *n*-pentane/EtOAc 2:1) to obtain *trans*-diol **25** (16.0 mg, 0.0447 mmol, 62%) as colourless oil.

**TLC:** R<sub>f</sub> = 0.34 (*n*-pentane/EtOAc 2:1). **<sup>1</sup>H-NMR:** 500 MHz, CDCl<sub>3</sub>; δ=7.41 (t, 1H, *J*=8.3 Hz, 3-H), 6.88 (dd, 1H, *J*=1.0 Hz, 8.5 Hz, 4-H), 6.80 (dd, 1H, *J*=0.8 Hz, 8.1 Hz, 2-H), 6.57 (dd, 1H, *J*=72.1 Hz, 77.2 Hz, 12-H), 4.74 (dd, 1H, *J*=5.1 Hz, 8.6 Hz, 5a-H), 4.11 (d, 1H, *J*=3.0 Hz, 6-H), 3.96 (s, 3H, 11-H<sub>3</sub>), 3.85 (d, 1H, *J*=8.6 Hz, 7a-H), 3.56 (s, 1H, 7-OH), 2.90 (qt, 1H, *J*=4.6 Hz, 7.2 Hz, 5-H), 2.73 (s, 1H, 6-OH), 1.30 (d, 3H, *J*=7.3 Hz, 9-H<sub>3</sub>) ppm. **<sup>13</sup>C-NMR:** 126 MHz, CDCl<sub>3</sub>; δ=189.6 (8-C), 173.2 (4a-C), 162.5 (10-C), 149.7 (1-C), 136.0 (3-

C), 116.5 (8a-C), 116.2 (dd,  $J=259.1$  Hz, 262.9 Hz, 12-C), 115.9 (4-C), 115.0 (2-C), 84.9 (7a-C), 80.1 (7-C), 77.4 (5a-C), 57.0 (6-C), 54.0 (11-C), 46.1 (5-C), 11.4 (9-C) ppm.  **$^{19}\text{F}$ -NMR:** 282 MHz,  $\text{CDCl}_3$ ;  $\delta=-82.1$  (d, 2F,  $J=164.4$  Hz, 595.5 Hz, 12-F<sub>2</sub>) ppm. **HR-MS:** (ESI+):  $m/z$  calc. for  $\text{C}_{16}\text{H}_{16}\text{F}_2\text{O}_7\text{Na}$   $[\text{M}-\text{Na}]^+$ : 381.0756, found 381.0754. **FT-IR:** (neat):  $\tilde{\nu}=3458$  (w), 2956 (w), 1766 (m), 1742 (w), 1641 (s), 1578 (w), 1462 (s), 1361 (m), 1262 (w), 1219 (s), 1151 (w), 1058 (m), 1019 (w), 968 (w), 922 (w), 793 (w), 729 (m), 670 (w)  $\text{cm}^{-1}$ .  **$[\alpha]$ :** -37.7 (c 1.0,  $\text{CHCl}_3$ , for a sample with 98% ee).

### 2.14 (-)-Preussochromone D 3

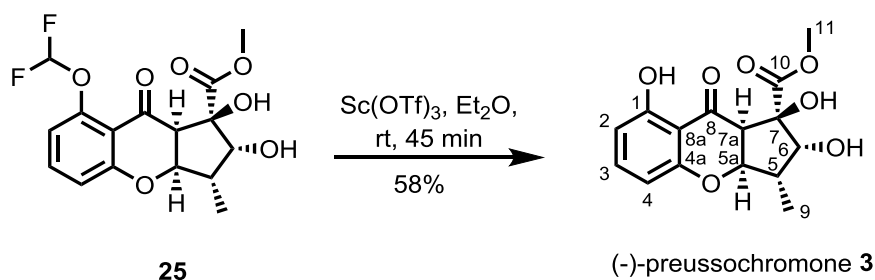

*Trans*-diol **25** (16.0 mg, 0.0447 mmol, 1.00 equiv) was dissolved in Et<sub>2</sub>O (2 mL) and Sc(OTf)<sub>3</sub> (24.0 mg, 0.0492 mmol, 1.10 equiv) was added at room temperature. The reaction was stirred for 45 min, then water (5 mL) was added and the aqueous layer was extracted with Et<sub>2</sub>O (3x5 mL). The combined organic extracts were dried over Na<sub>2</sub>SO<sub>4</sub>, the solvent was removed under reduced pressure and the crude product was purified by column chromatography (silica, *n*-pentane/EtOAc 2:1) to obtain (–)-preussochromone D (**3**) (8.00 mg, 0.0260 mmol, 58%) as pale yellow powder.

**TLC:**  $R_f$  = 0.30 (*n*-pentane/EtOAc 2:1). **<sup>1</sup>H-NMR:** 500 MHz, CDCl<sub>3</sub>;  $\delta$ =11.93 (s, 1H, 1-OH), 7.37 (t, 1H, *J*=8.3 Hz, 3-H), 6.37 (dd, 2H, *J*=0.8 Hz, 8.3 Hz, 4-H, 2-H), 4.82 (dd, 1H, *J*=4.4 Hz, 7.9 Hz, 5a-H), 4.73 (s, 1H, 7-OH), 4.50 (d, 1H, *J*=5.2 Hz, 6-OH), 4.23 (t, 1H, *J*=5.4 Hz, 6-H), 3.98 (d, 1H, *J*=7.9 Hz, 7a-H), 3.79 (s, 3H, 11-H<sub>3</sub>), 2.80-2.86 (m, 1H, 5-H), 1.20 (d, 3H, *J*=7.4 Hz, 9-H<sub>3</sub>) ppm. **<sup>13</sup>C-NMR:** 126 MHz, CDCl<sub>3</sub>;  $\delta$ =198.0 (8-C), 173.3 (10-C), 162.9 (1-C), 162.1 (4a-C), 139.3 (3-C), 109.5 (8a-C), 109.1 (2-C), 108.1 (4-C), 88.1 (7-C), 86.0 (5a-C), 82.3 (6-C), 52.9 (7a-C), 52.9 (11-C), 46.6 (5-C), 11.5 (9-C) ppm. **HR-MS:** (ESI+): *m/z* calc. for C<sub>15</sub>H<sub>16</sub>O<sub>7</sub>Na [M-Na]<sup>+</sup>: 331.0788, found 331.0790. **FT-IR:** (neat):  $\tilde{\nu}$  = 3478 (w), 2930 (w), 1728 (m), 1635 (s), 1577 (w), 1462 (s), 1368 (m), 1292 (w), 1219 (s), 1159 (w), 1129 (w), 1067 (m), 991 (w), 962 (w), 801 (w), 733 (w), 501 (w), 477 (w) cm<sup>-1</sup>. **UV/VIS:** (MeOH, c=1.62·10<sup>-5</sup> mol/L);  $\lambda_{\text{max}}$  (log  $\epsilon$ ): 227 (5.33), 258 (5.31), 282 (5.30), 355 (5.33) nm. **m.p.:** 162 °C (Et<sub>2</sub>O). **[ $\alpha$ ]:** -21.1 (c 0.17, MeOH for a sample with 98%ee).

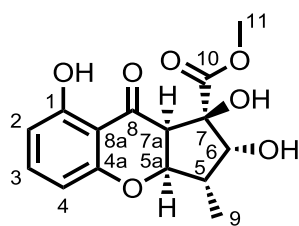

(-)-preussochromone **3**

| No                      | Isolated product <sup>[10]</sup>                    | synthetic product                                   | Isolated product <sup>[10]</sup>       | synthetic product                      |
|-------------------------|-----------------------------------------------------|-----------------------------------------------------|----------------------------------------|----------------------------------------|
|                         | acetone-d <sub>6</sub><br>(500 MHz)<br>δH (J in Hz) | acetone-d <sub>6</sub><br>(500 MHz)<br>δH (J in Hz) | acetone-d <sub>6</sub> (100 MHz)<br>δC | acetone-d <sub>6</sub> (126 MHz)<br>δC |
| <b>1</b>                |                                                     |                                                     | 162.8                                  | 162.9                                  |
| <b>2</b>                | 6.37, d (8.5)                                       | 6.37, d (8.3)                                       | 109.0                                  | 109.1                                  |
| <b>3</b>                | 7.38, t (8.5)                                       | 7.37, t (8.3)                                       | 139.2                                  | 139.3                                  |
| <b>4</b>                | 6.37, d (8.5)                                       | 6.37, d (8.3)                                       | 108.1                                  | 108.1                                  |
| <b>4a</b>               |                                                     |                                                     | 162.1                                  | 162.1                                  |
| <b>5</b>                | 2.83, m                                             | 2.80-2.86, m                                        | 46.6                                   | 46.6                                   |
| <b>5a</b>               | 4.82, dd (4.0, 8.0)                                 | 4.82, dd (4.4, 7.9)                                 | 86.0                                   | 86.0                                   |
| <b>6</b>                | 4.23, d (5.5)                                       | 4.23, t (5.4)                                       | 82.3                                   | 82.3                                   |
| <b>7</b>                |                                                     |                                                     | 88.0                                   | 88.1                                   |
| <b>7a</b>               | 3.98, d (8.0)                                       | 3.98, d (7.9)                                       | 52.8                                   | 52.9                                   |
| <b>8</b>                |                                                     |                                                     | 198.0                                  | 198.0                                  |
| <b>8a</b>               |                                                     |                                                     | 109.4                                  | 109.5                                  |
| <b>9</b>                | 1.20, d (7.5)                                       | 1.20, d (7.4)                                       | 11.4                                   | 11.5                                   |
| <b>10</b>               |                                                     |                                                     | 173.2                                  | 173.3                                  |
| <b>11</b>               | 3.79, s                                             | 3.79, s                                             | 52.8                                   | 52.9                                   |
| <b>OH-1</b>             | 11.94, s                                            | 11.93, s                                            |                                        |                                        |
| <b>OH-6<sup>a</sup></b> | 4.77, s                                             | 4.50, d (5.2)                                       |                                        |                                        |
| <b>OH-7<sup>a</sup></b> | 4.54, s, br                                         | 4.73, s                                             |                                        |                                        |

<sup>a</sup> The author assigned the duplet at 4.50 ppm to OH-6 instead of OH-7 (and vice versa) as described in the publication of Che *et al.* due to its multiplicity.



**2.15 *rac*-methyl (*R*)-2-diazo-4-((*S*)-5-(difluoromethoxy)-2-methyl-4-oxochroman-2-yl)-3-oxopentanoate **16****

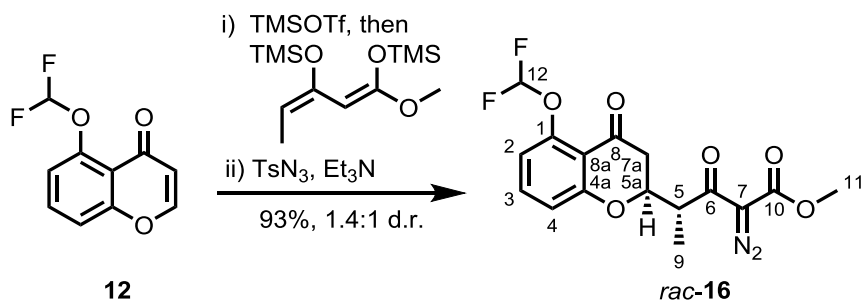

TMSOTf (9.26 mL, 51.2 mmol, 1.50 equiv) was added to a solution of chromenone **12** (7.24 g, 31.1 mmol, 1.00 equiv) in  $\text{CH}_2\text{Cl}_2$  (300 mL) at room temperature. The yellow solution was stirred for 30 min and then cooled to  $-78\text{ }^\circ\text{C}$ . A solution of bissilylenolether<sup>9</sup> (15.6 g, 68.2 mmol, 2.00 equiv) in  $\text{CH}_2\text{Cl}_2$  (150 mL) was added dropwise over a period of 2 h, then the reaction was stopped by addition of sat.  $\text{NH}_4\text{Cl}$ -solution (50 mL). The suspension was warmed to room temperature and the aqueous layer was extracted with  $\text{CH}_2\text{Cl}_2$  (3x100 mL). The combined organic extracts were dried over  $\text{Na}_2\text{SO}_4$ , filtered and concentrated under reduced pressure. The oily remnants were dissolved in MeCN (300 mL) and  $\text{TsN}_3$  (7.84 mL, 51.2 mmol, 1.50 equiv) and  $\text{Et}_3\text{N}$  (5.23 mL, 37.5 mmol, 1.10 equiv) were added subsequently. The orange solution was stirred over night and then all volatile components were removed under reduced pressure. The crude product was purified by column chromatography (silica, *n*-pentane/EtOAc 4:1) to obtain *rac*-**16** (11.7 g, 31.7 mmol, 93 %) as yellow solid.

The analytical data of *rac*-**16** was in accordance with the chiral product **16** received from 2.6.

**2.16 *rac*-methyl (*R*)-4-((*S*)-5-(difluoromethoxy)-4-oxochroman-2-yl)-2,3-dioxopentanoate **26****

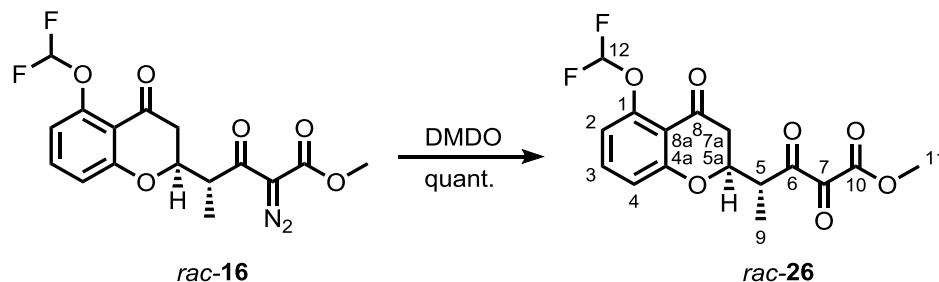

$\alpha$ -Diazo- $\beta$ -ketoester *rac*-**16** (3.17 g, 8.61 mmol, 1.00 equiv) was dissolved in DMSO-solution<sup>9</sup> (0.055M, 250 mL, 13.8 mmol, 1.60 equiv) and stirred over night at room temperature. The solution was concentrated under reduced pressure to obtain *rac*-**26** (3.22 g, 8.61 mmol, quant) as yellow oil. The crude product was used in the next step without further purification.

**TLC:**  $R_f$  = 0.12 (*n*-pentane/EtOAc 2:1). **<sup>1</sup>H-NMR:** 500 MHz, CDCl<sub>3</sub>;  $\delta$ =7.43 (t, 1H,  $J$ =8.3 Hz, 3-H), 6.84 (d, 2H,  $J$ =8.5 Hz, 4-H, 2-H), 6.57 (t, 1H,  $J$ =74.6 Hz, 12-H), 4.82 (ddd, 1H,  $J$ =2.5 Hz, 5.4 Hz, 13.6 Hz, 5a-H), 3.89 (s, 3H, 11-H<sub>3</sub>), 3.73-3.81 (m, 1H, 5-H), 2.85 (dd, 1H,  $J$ =14.0 Hz, 16.1 Hz, 7a-H<sub>a</sub>), 2.67 (dd, 1H,  $J$ =2.4 Hz, 16.3 Hz, 7a-H<sub>b</sub>), 1.33 (d, 3H,  $J$ =7.1 Hz, 9-H<sub>3</sub>) ppm. **<sup>13</sup>C-NMR:** 126 MHz, CDCl<sub>3</sub>;  $\delta$ =198.9 (6-C), 188.9 (8-C), 181.9 (7-C), 161.8 (1-C), 161.0 (10-C), 150.2 (4a-C), 136.0 (3-C), 116.1 (t,  $J$ =262.8 Hz, 12-C), 115.9 (4-C), 115.8 (2-C), 114.2 (8a-C), 53.6 (5-C), 44.6 (11-C), 40.6 (7a-C), 10.0 (9-C) ppm. **<sup>19</sup>F-NMR:** 282 MHz, CDCl<sub>3</sub>;  $\delta$ =-82.7 (dd,  $J$ =163.2 Hz, 234.9 Hz, 2F, 10-F<sub>2</sub>) ppm. **HR-MS:** (ESI+):  $m/z$  calc. for C<sub>16</sub>H<sub>14</sub>F<sub>2</sub>O<sub>7</sub>Na [M-Na]<sup>+</sup>: 379.0611, found: 379.0594. **FT-IR:** (neat):  $\tilde{\nu}$  = 3451 (w), 2959 (w), 1731 (w), 1692 (s), 1609 (m), 1575 (w), 1469 (m), 1382 (w), 1321 (w), 1273 (w), 1223 (w), 1118 (s), 1035 (m), 968 (w), 909 (m), 799 (w), 730 (s), 648 (w), 581 (w), 522 (w) cm<sup>-1</sup>.

**2.17 *rac*-methyl (1*R*,3*S*,3*aR*,9*aR*)-1,8-dihydroxy-3-methyl-2,9-dioxo-1,2,3,3*a*,9,9*a*-hexahydrocyclopenta[*b*]chromene-1-carboxylate **27****

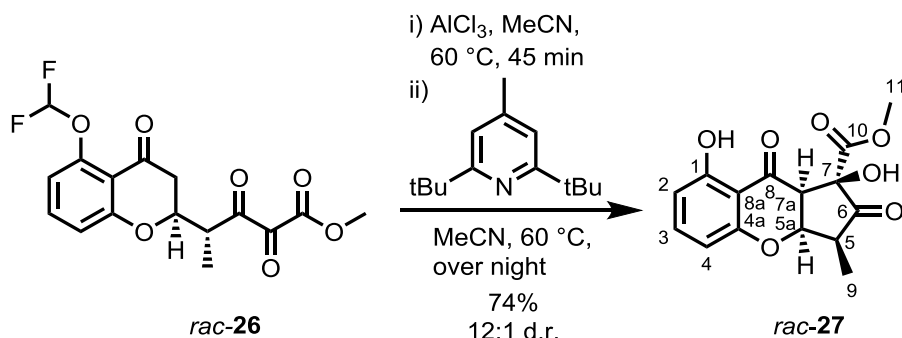

Vicinal tricarboxylate *rac*-**26** (1.04 g, 2.78 mmol, 1.00 equiv) was dissolved in MeCN (40 mL), AlCl<sub>3</sub> (556 mg, 4.17 mmol, 1.50 equiv) was added and the orange solution was heated to 60 °C for 45 min. The solution was cooled to room temperature and water (20 mL) was added. The aqueous layer was extracted with CH<sub>2</sub>Cl<sub>2</sub> (4x60 mL), the combined organic extracts were dried over Na<sub>2</sub>SO<sub>4</sub>, filtered and concentrated under reduced pressure. The oily remnants were dissolved in MeCN (100 mL), 2,6-di-tert-butyl-4-methylpyridine (571 mg, 2.78 mmol, 1.00 equiv) was added and the reaction was stirred over night at 60 °C. Silica was added and the solvent was removed under reduced pressure. Column chromatography (silica, *n*-pentane/EtOAc 2:1) gave *rac*-**27** (630 mg, 2.06 mmol, 74%, 12:1 d.r.) as pale yellow solid.

**TLC:** R<sub>f</sub> = 0.69 (*n*-pentane/EtOAc 1:1). **<sup>1</sup>H-NMR:** 500 MHz, CDCl<sub>3</sub>; δ=11.53 (s, 1H, 1-OH), 7.37 (t, 1H, *J*=8.3 Hz, 3-H), 6.55 (dd, 1H, *J*=0.8 Hz, 8.4 Hz, 4-H), 6.44 (dd, 1H, *J*=0.8 Hz, 8.2 Hz, 2-H), 5.06 (t, 1H, *J*=4.1 Hz, 5*a*-H), 3.89 (s, 3H, 11-H<sub>3</sub>), 3.84 (s, 1H, 7-OH), 3.68 (d, 1H, *J*=4.1 Hz, 7*a*-H), 2.90 (qd, 1H, *J*=4.1 Hz, 6.9 Hz, 5-H), 6.96 (d, 3H, *J*=7.0 Hz, 9-H<sub>3</sub>) ppm. **<sup>13</sup>C-NMR:** 126 MHz, CDCl<sub>3</sub>; δ=208.7 (6-C), 194.0 (8-C), 170.6 (10-C), 162.1 (1-C), 160.6 (4*a*-C), 139.0 (3-C), 110.7 (2-C), 109.4 (8*a*-C), 108.0 (4-C), 78.4 (7-C), 78.2 (5*a*-C), 54.4 (7*a*-C), 52.8 (11-C), 49.5 (5-C), 7.6 (9-C) ppm. **HR-MS:** (ESI<sup>+</sup>): *m/z* calc. for C<sub>15</sub>H<sub>14</sub>O<sub>7</sub>Na [M-Na]<sup>+</sup>: 329.0632, found: 329.0629. **FT-IR:** (neat):  $\tilde{\nu}$  = 3459 (w), 2956 (w), 1765 (m), 1744 (w), 1641 (s), 1578 (w), 1463 (s), 1362 (m), 1259 (w), 1220 (s), 1139 (w), 1060 (m), 968 (w), 819 (w), 795 (w), 727 (w) cm<sup>-1</sup>. **m.p.:** 174 °C (Et<sub>2</sub>O).

### 3 $^1\text{H}$ , $^{13}\text{C}$ , $^{19}\text{F}$ & NOESY-NMR

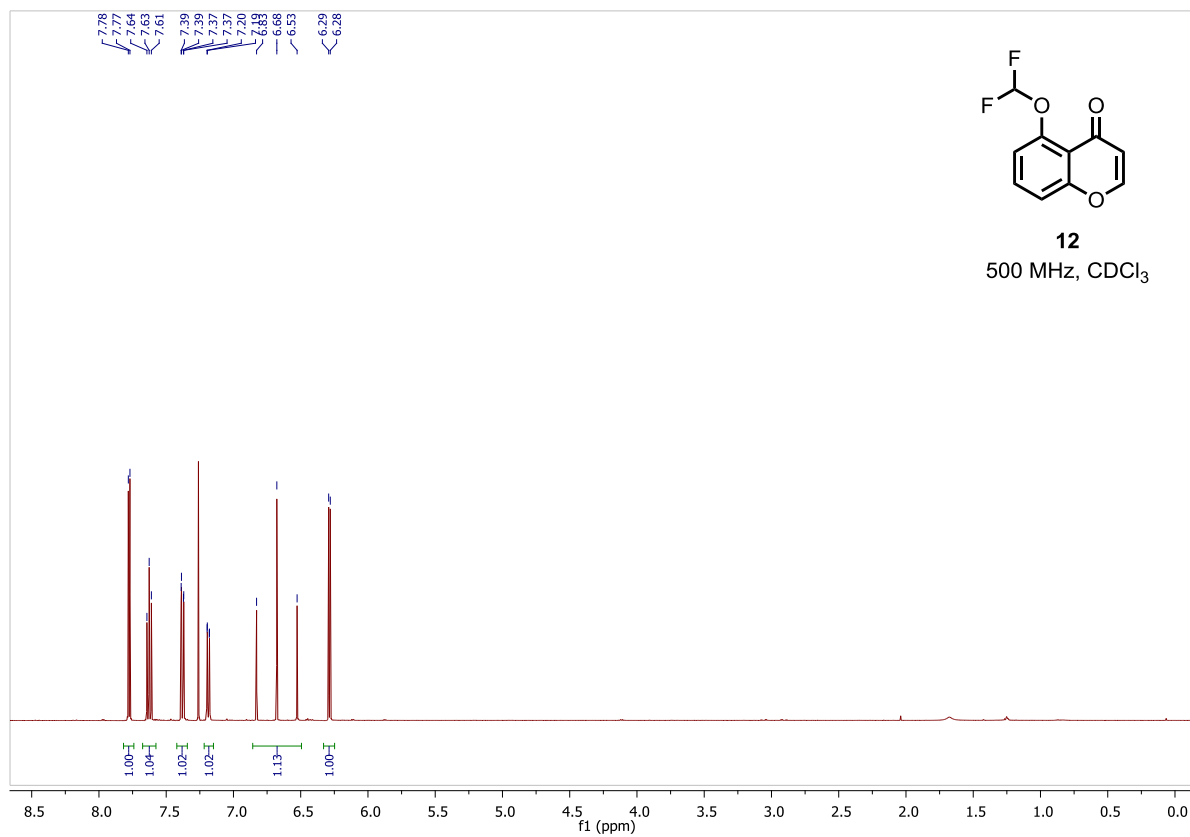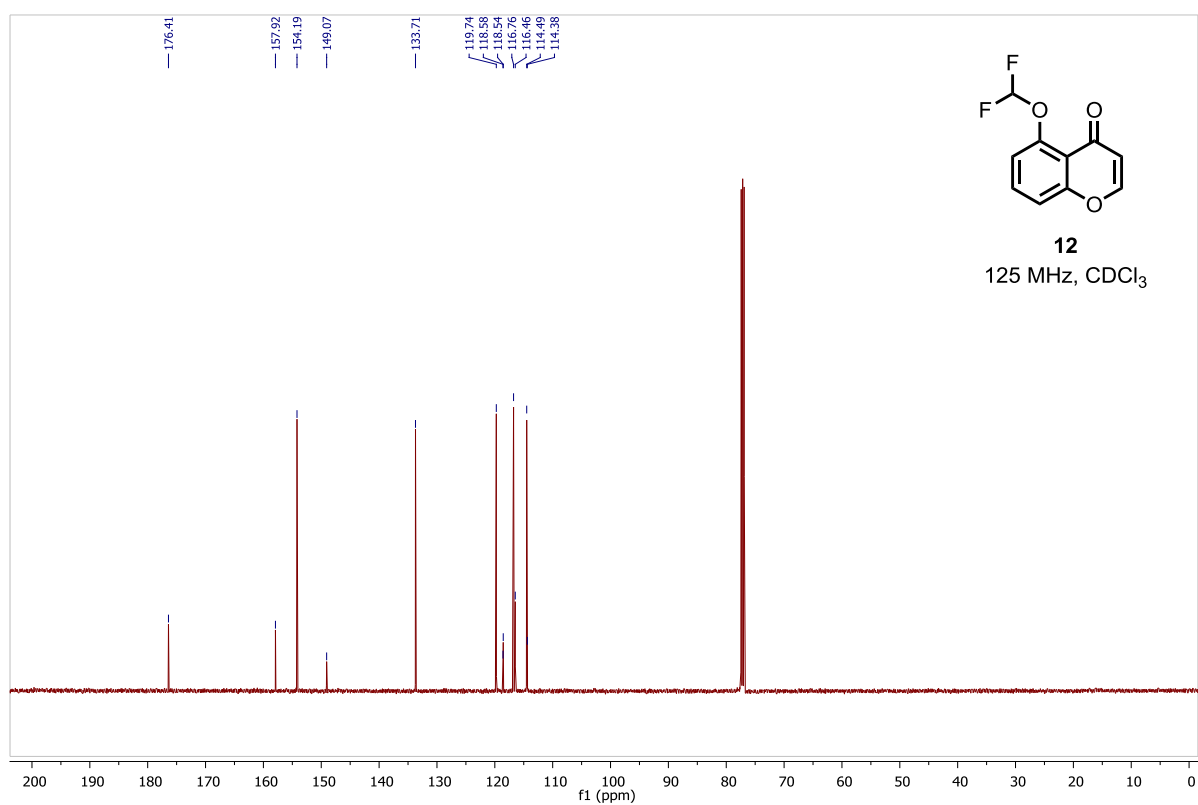

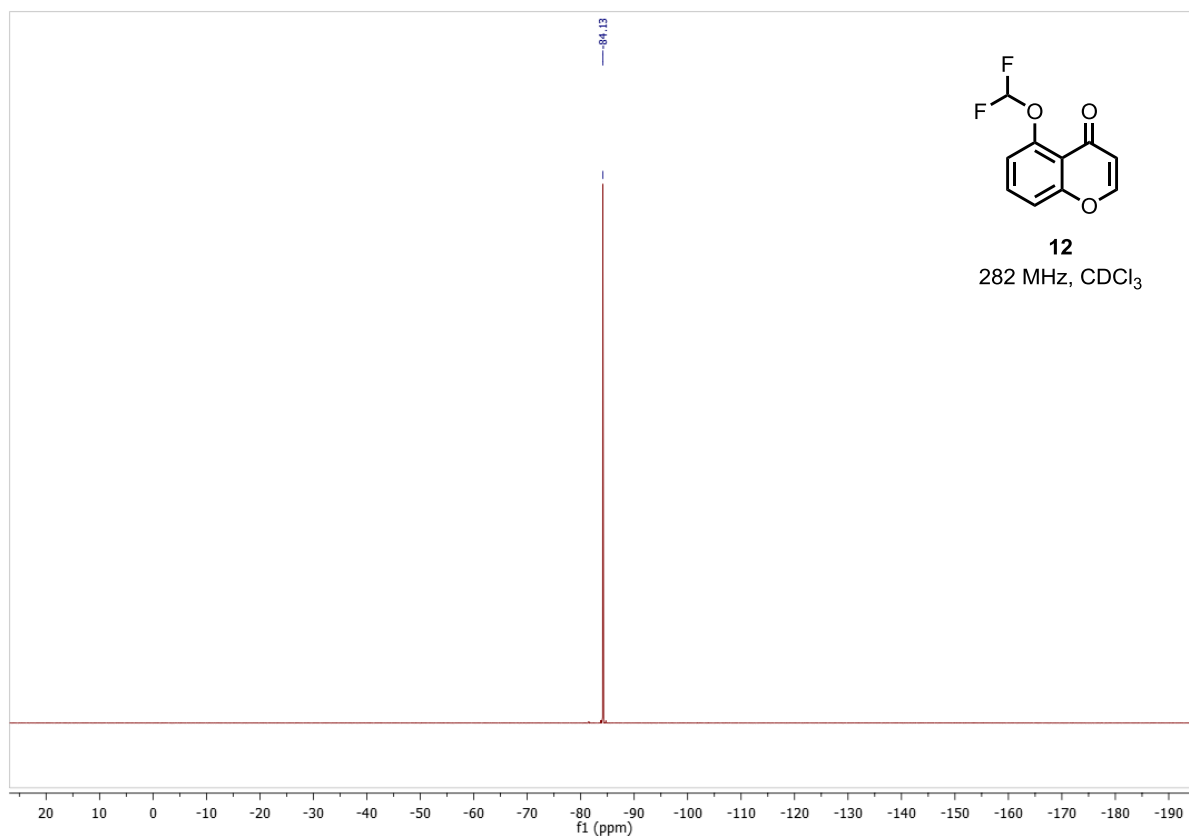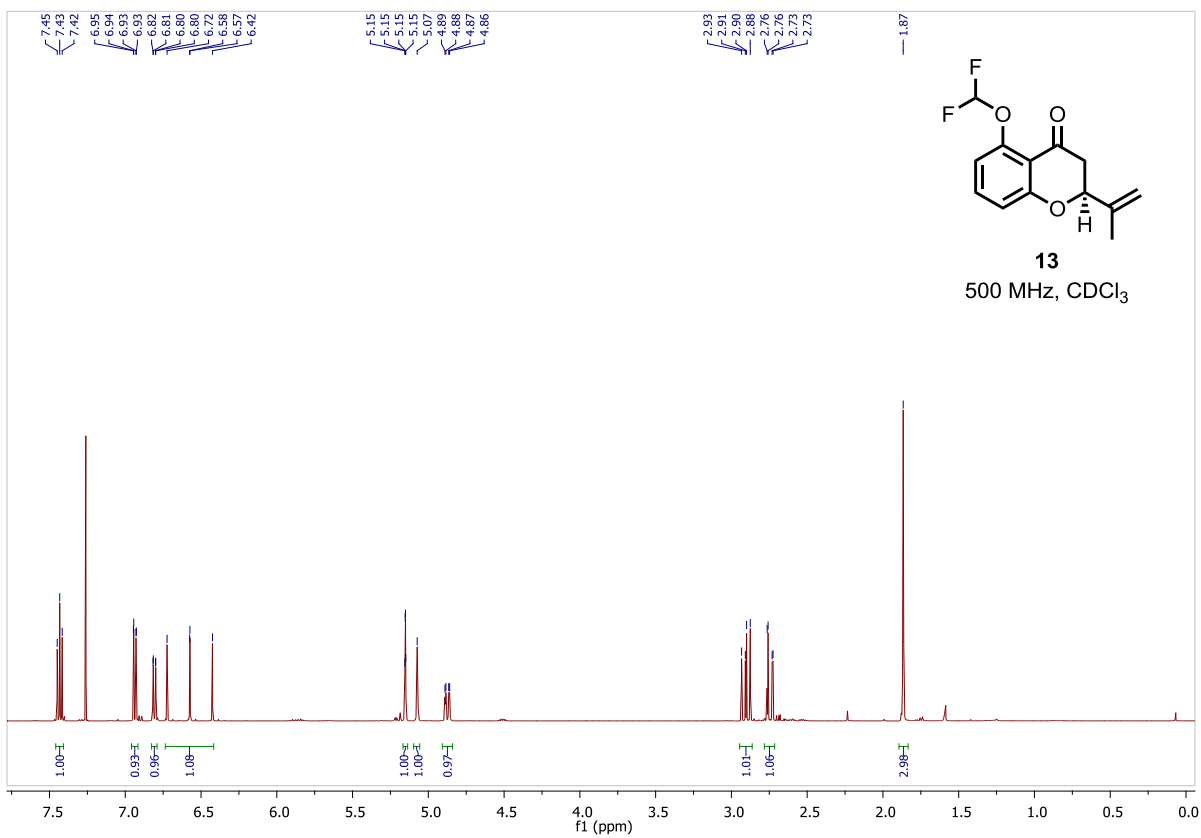

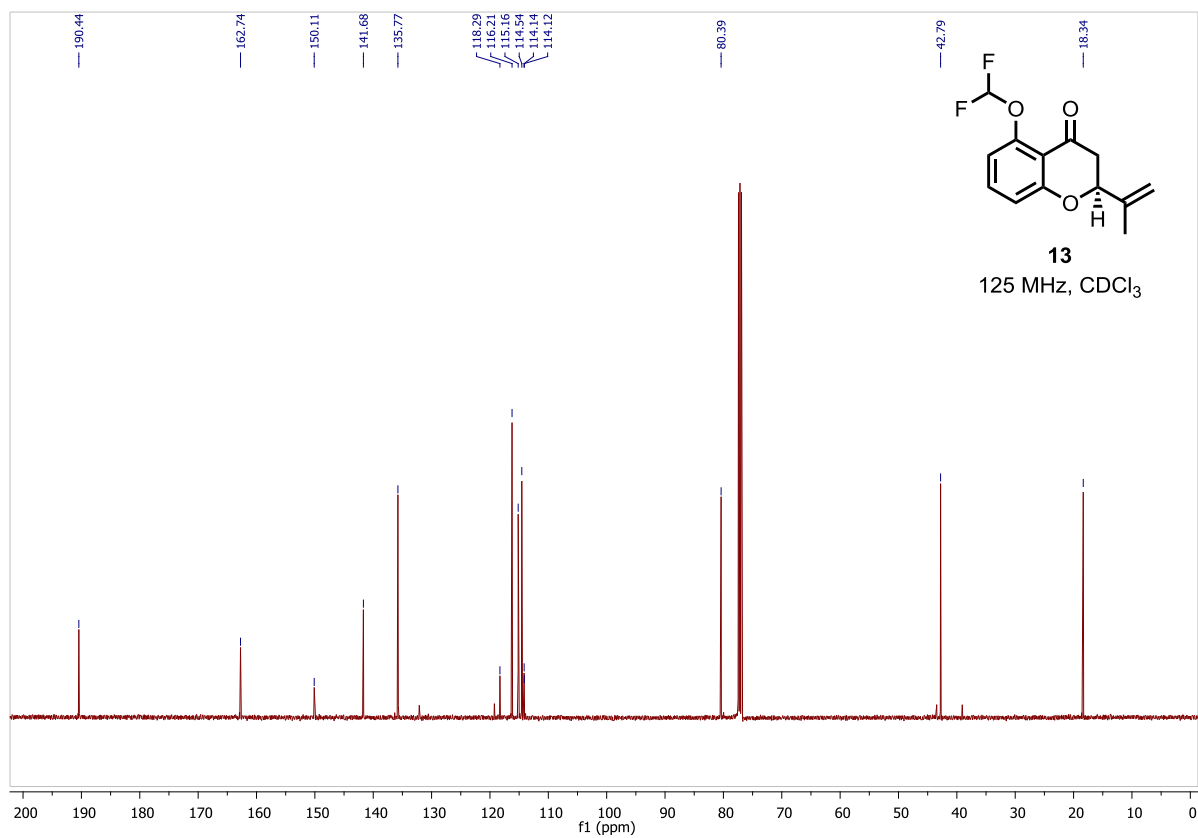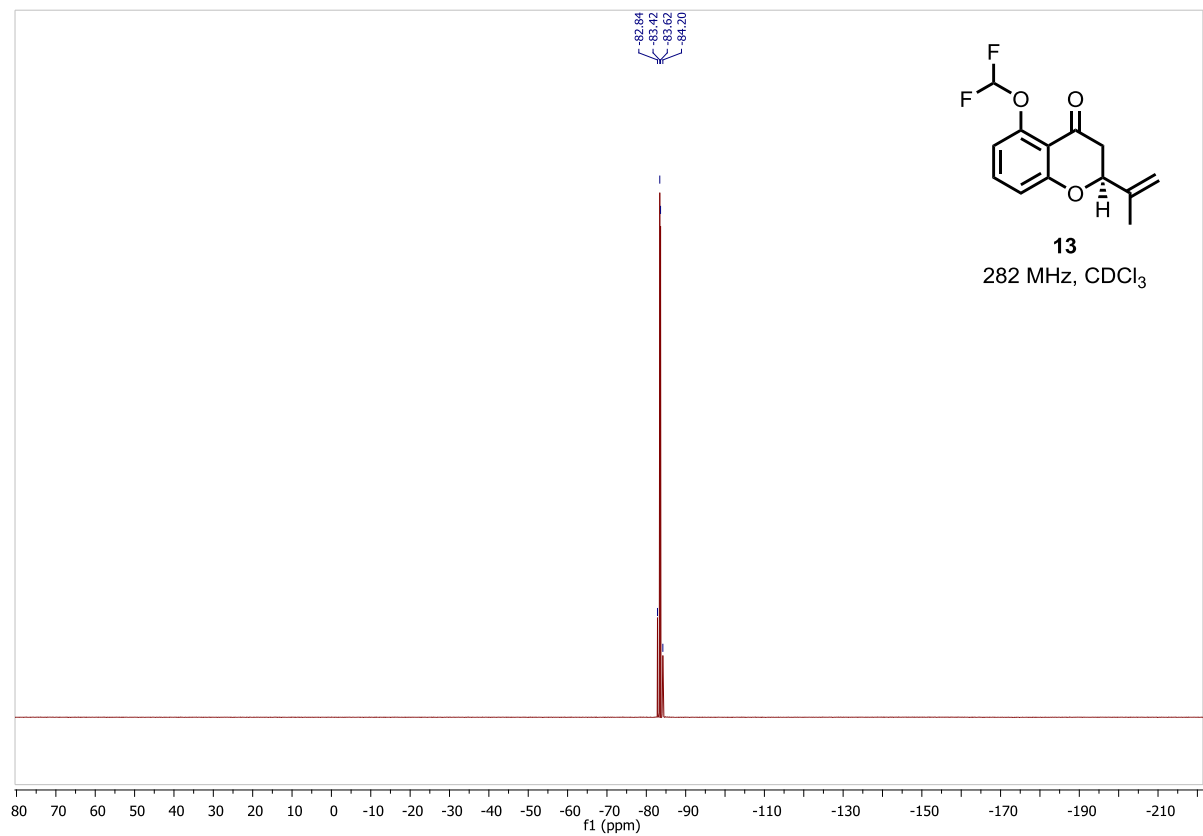

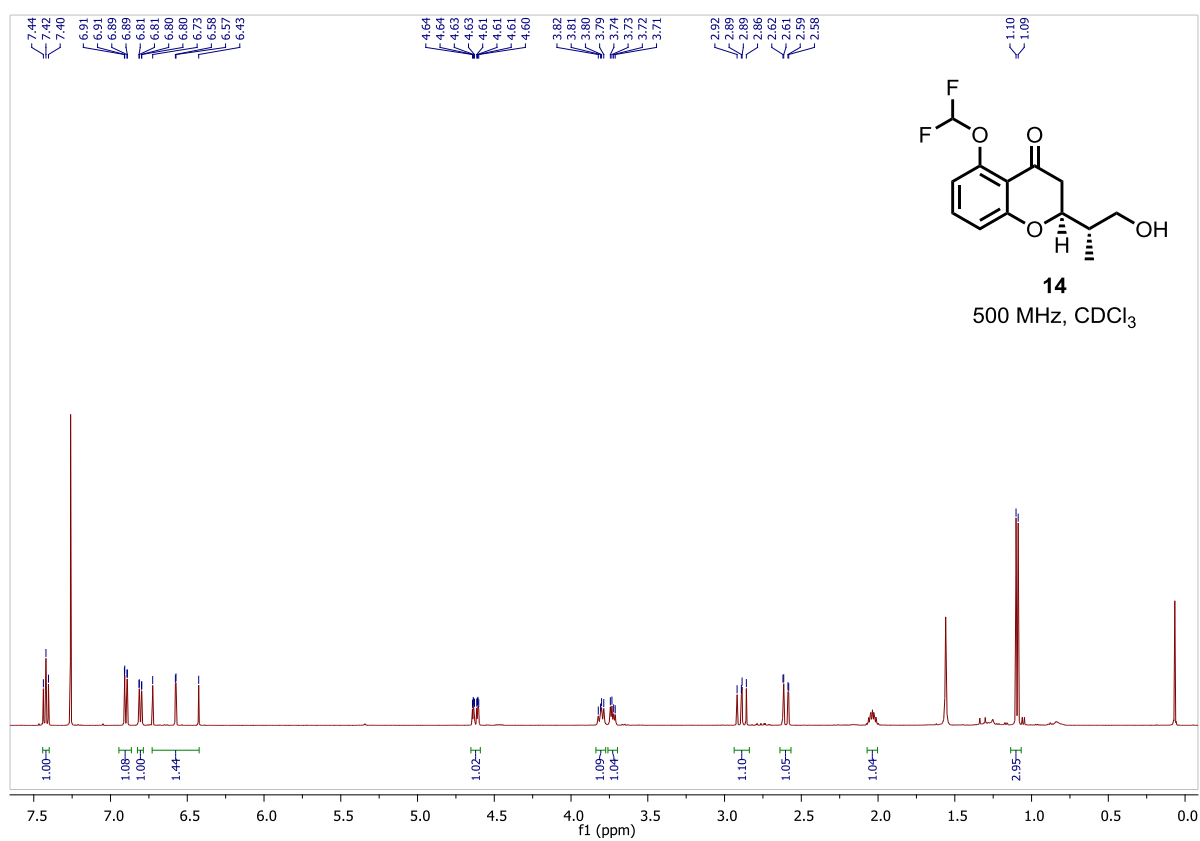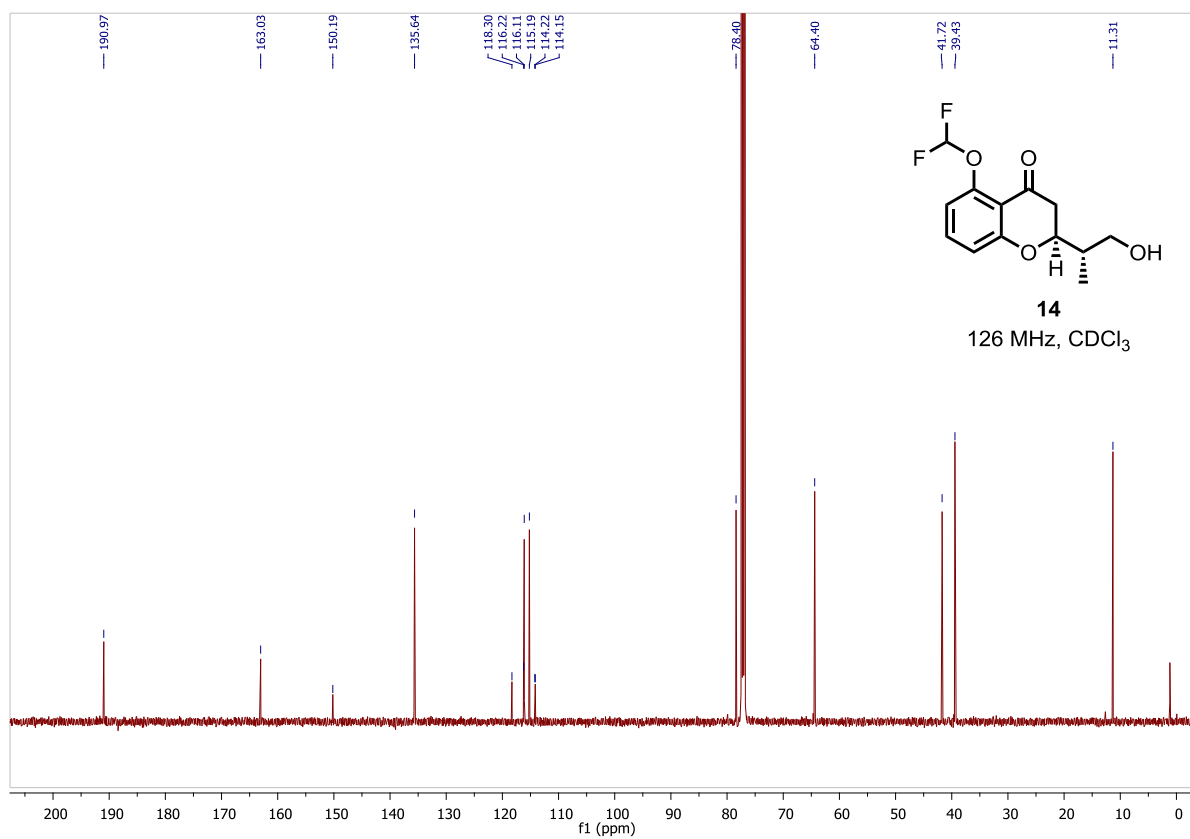

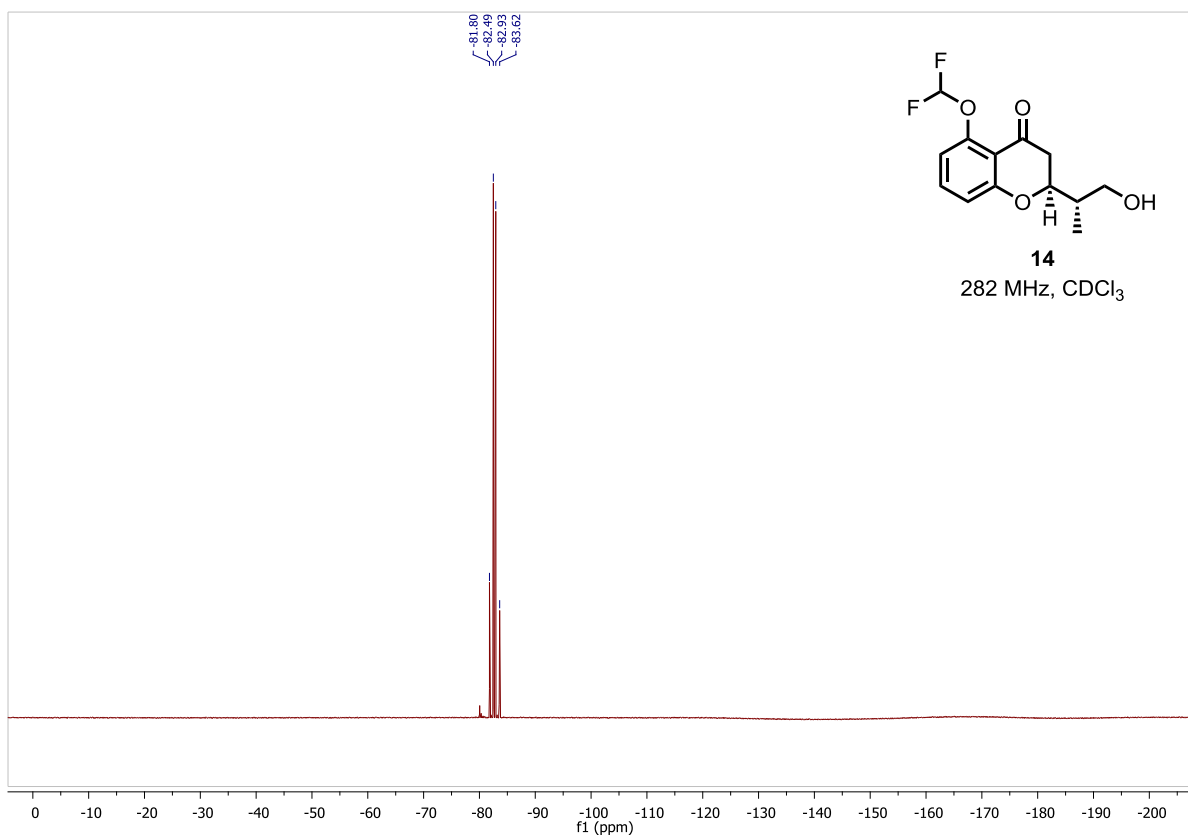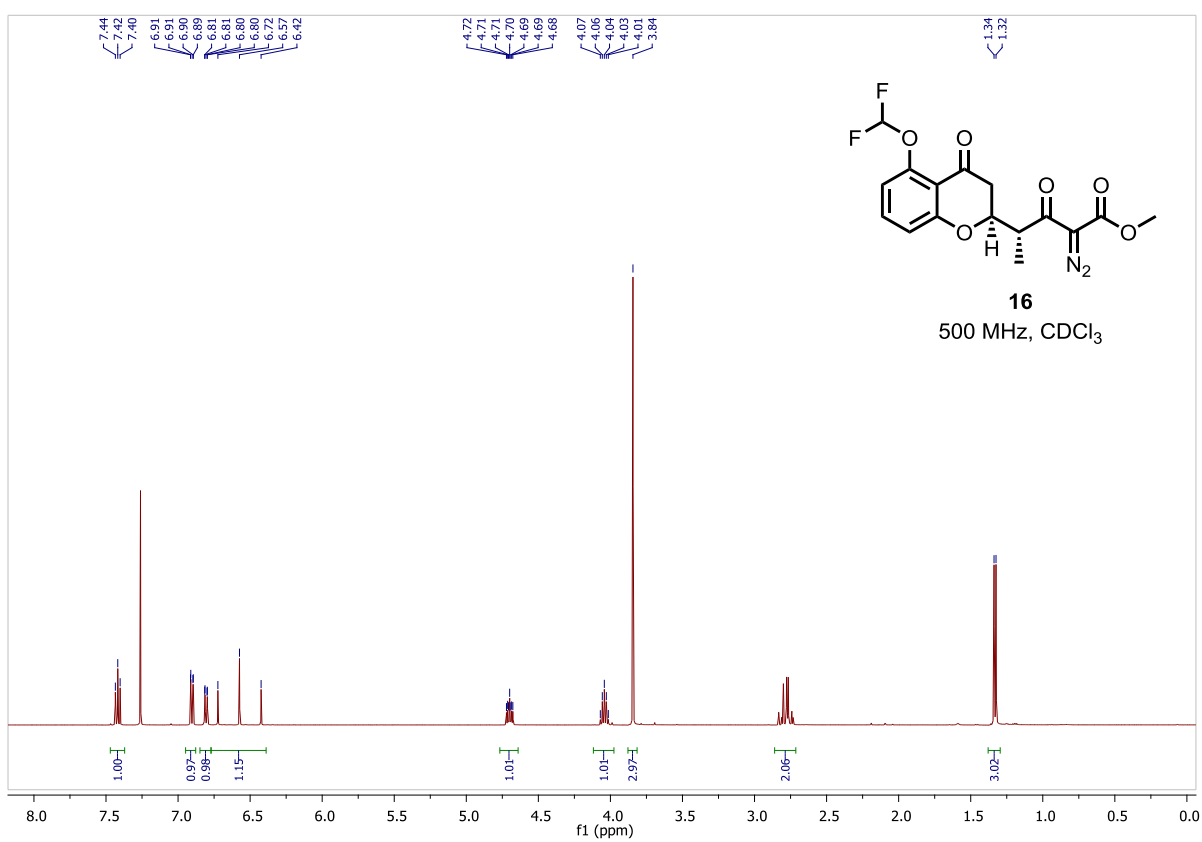



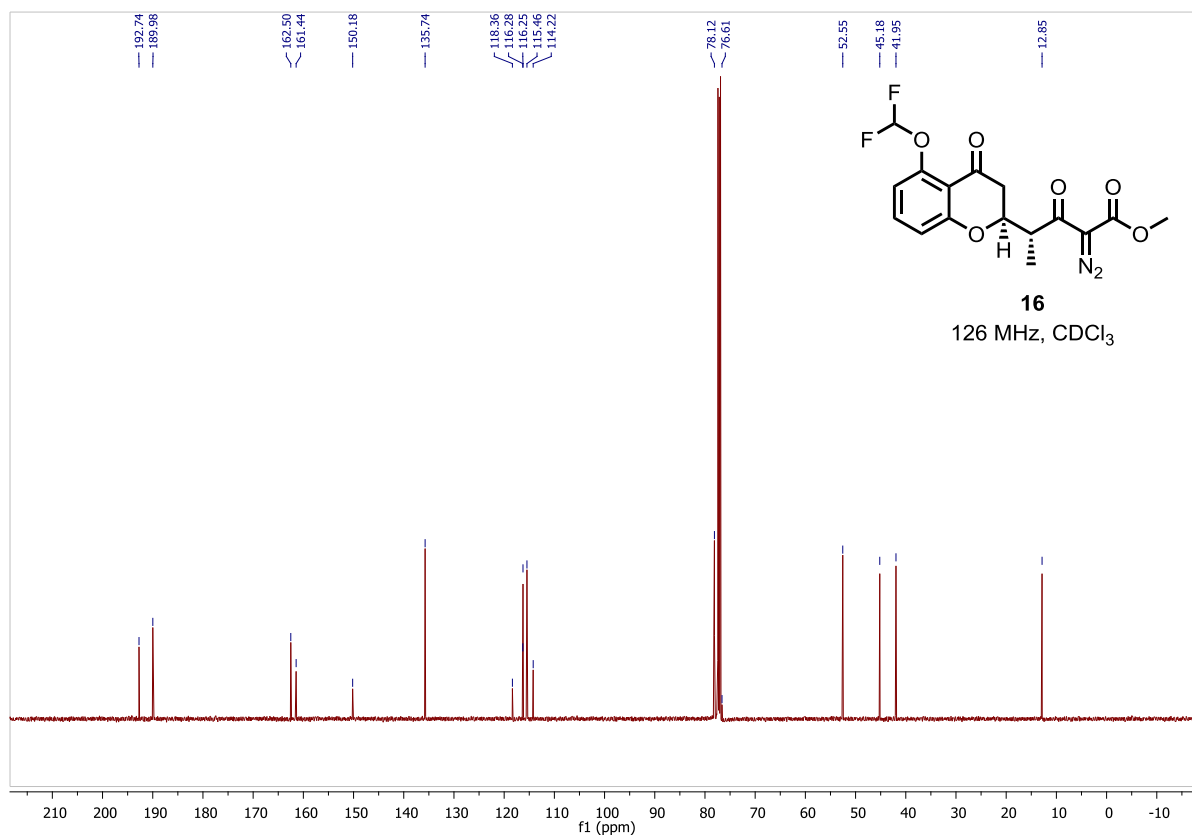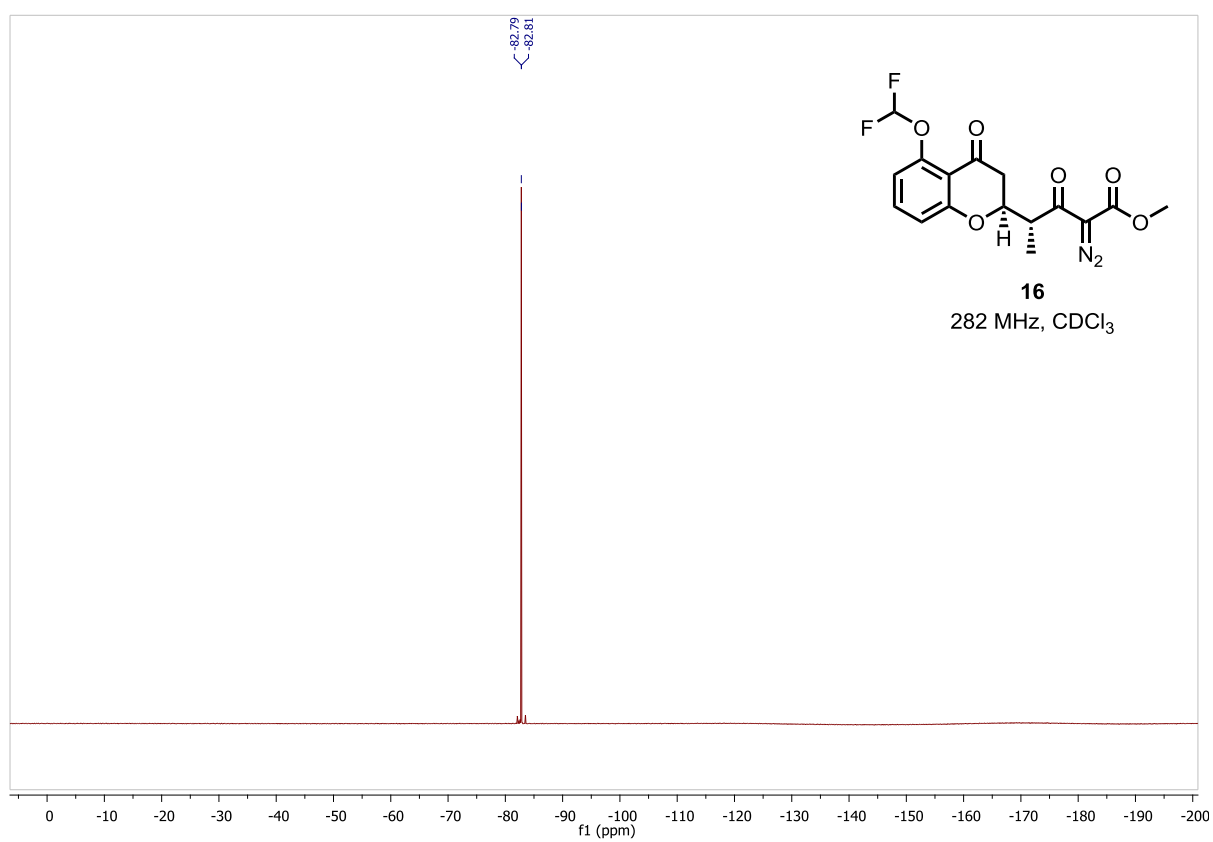

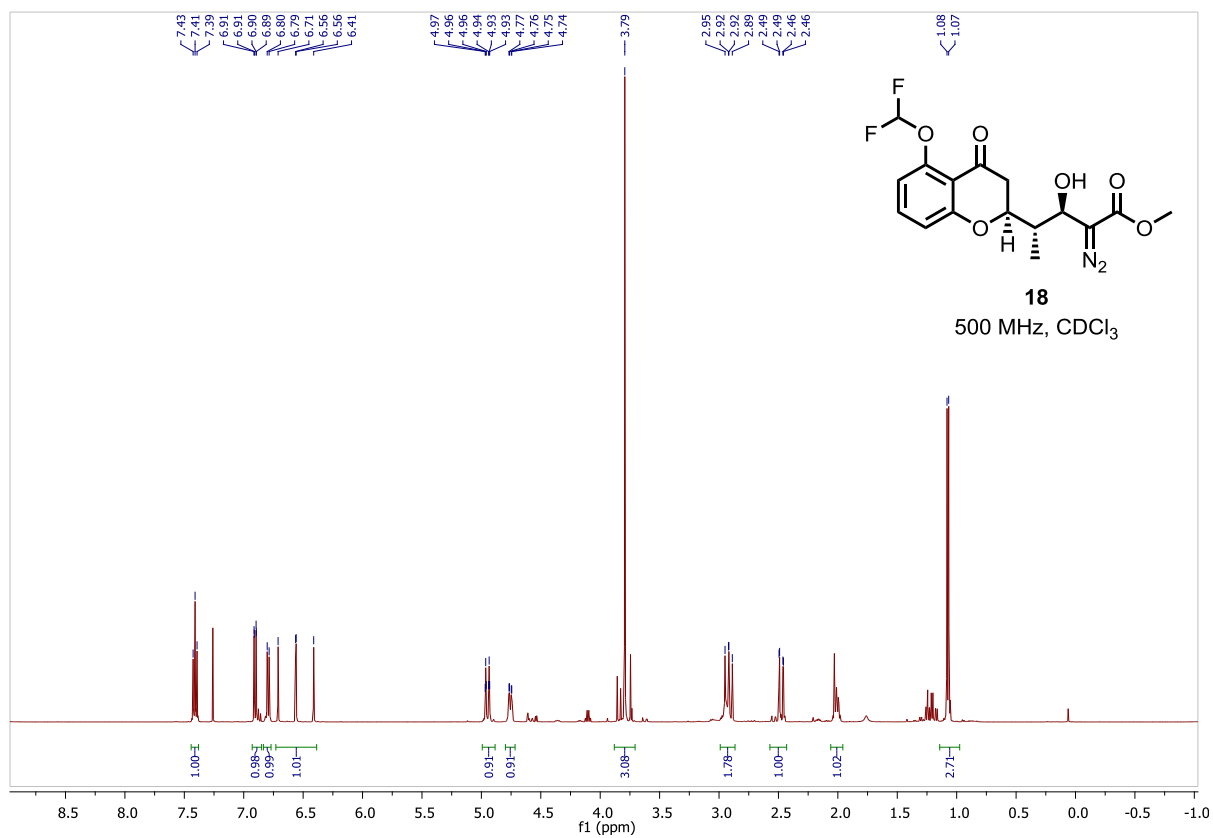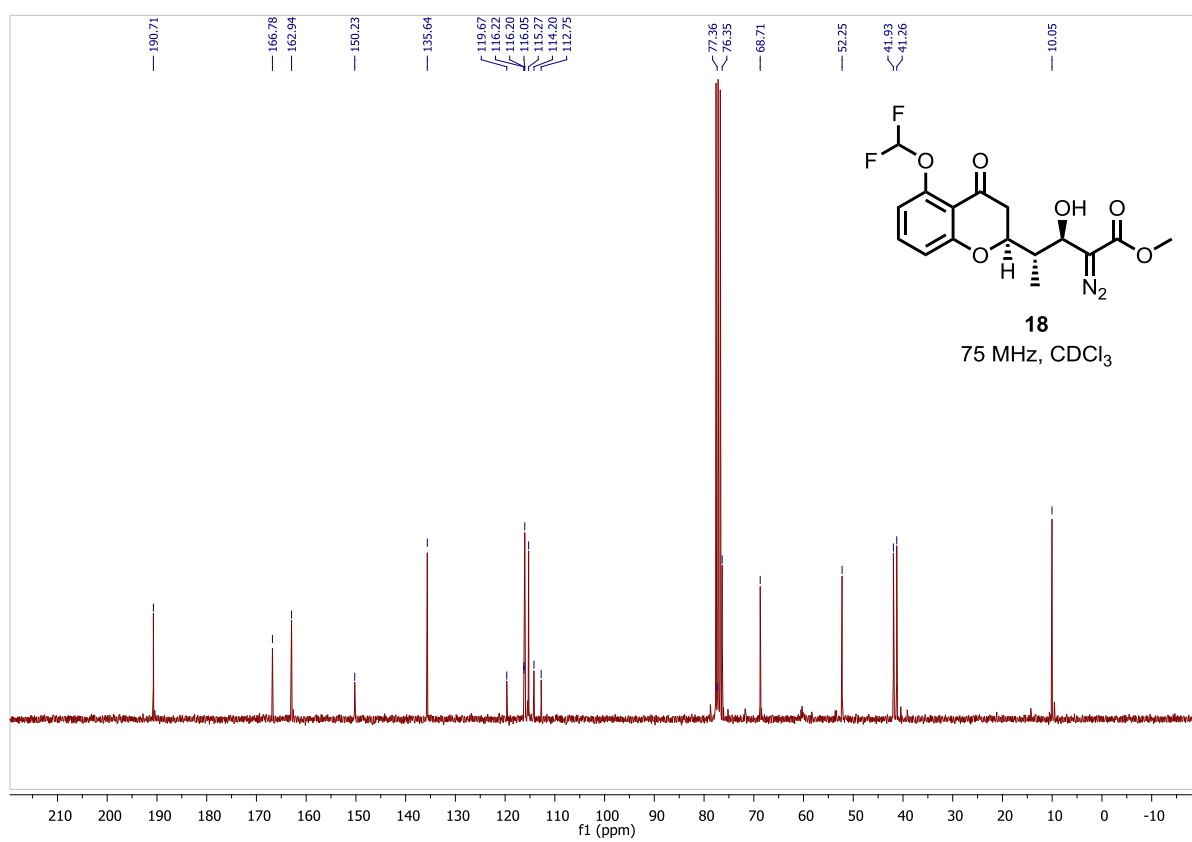

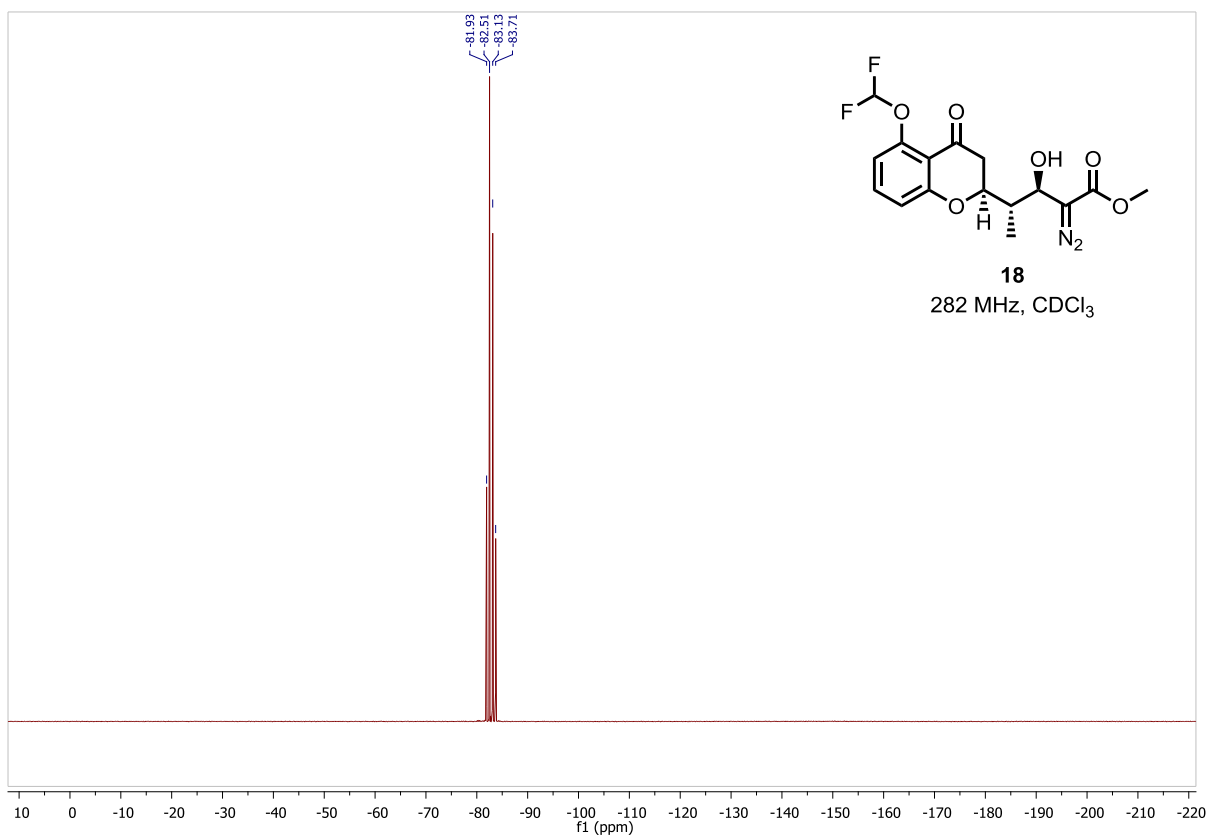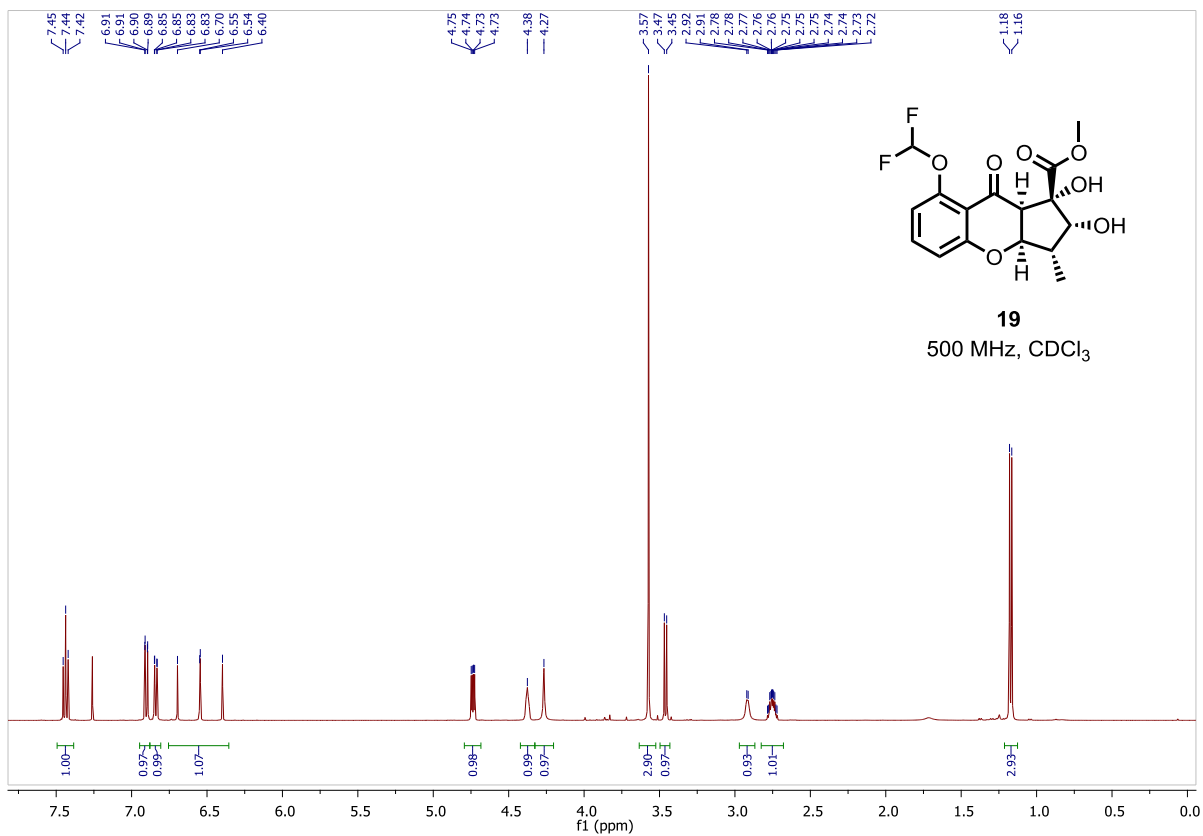

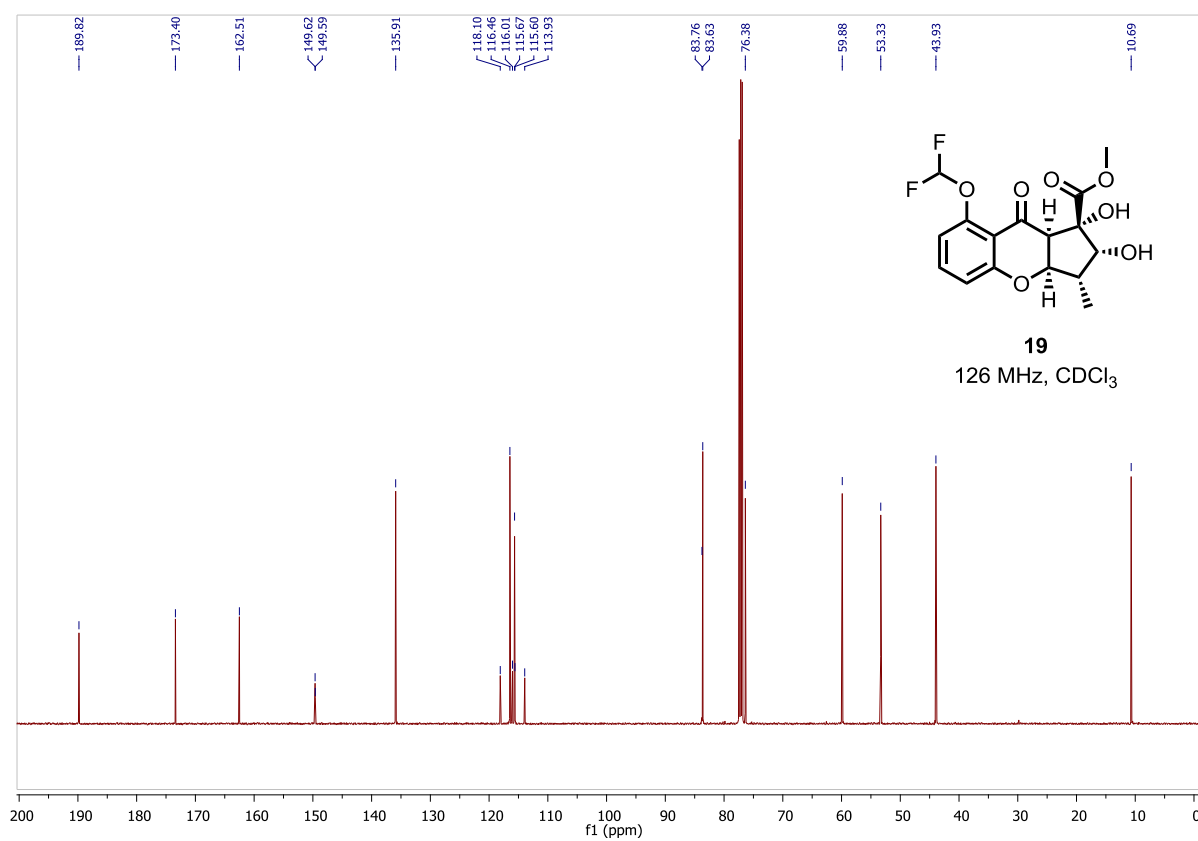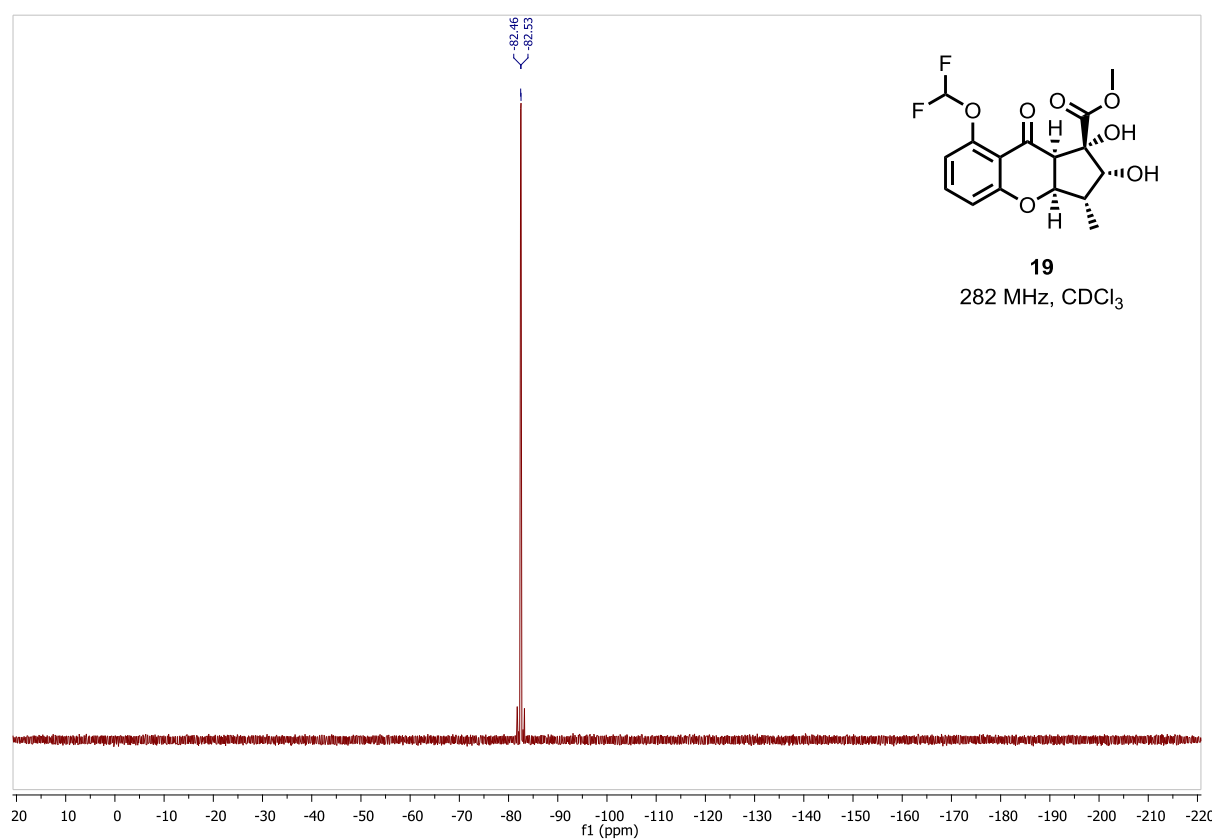

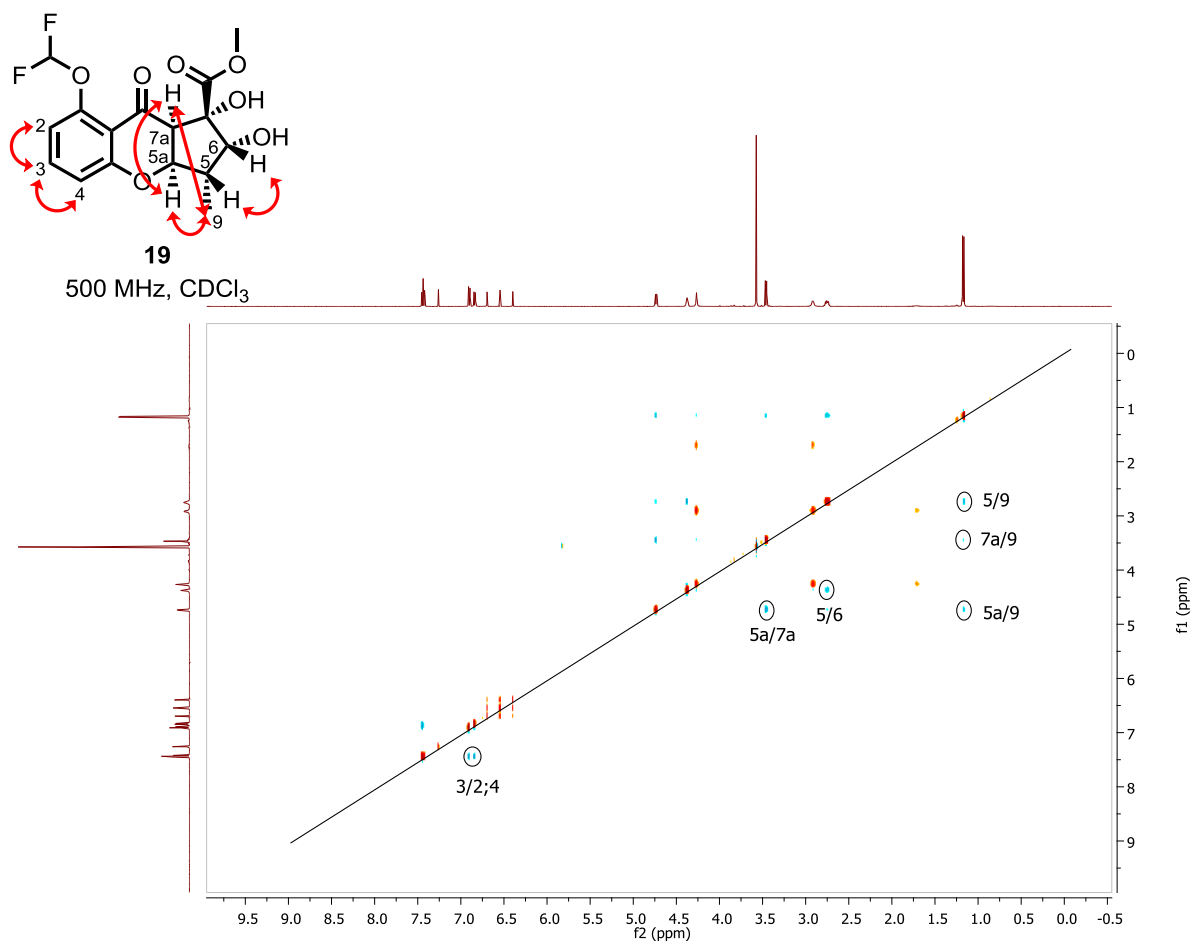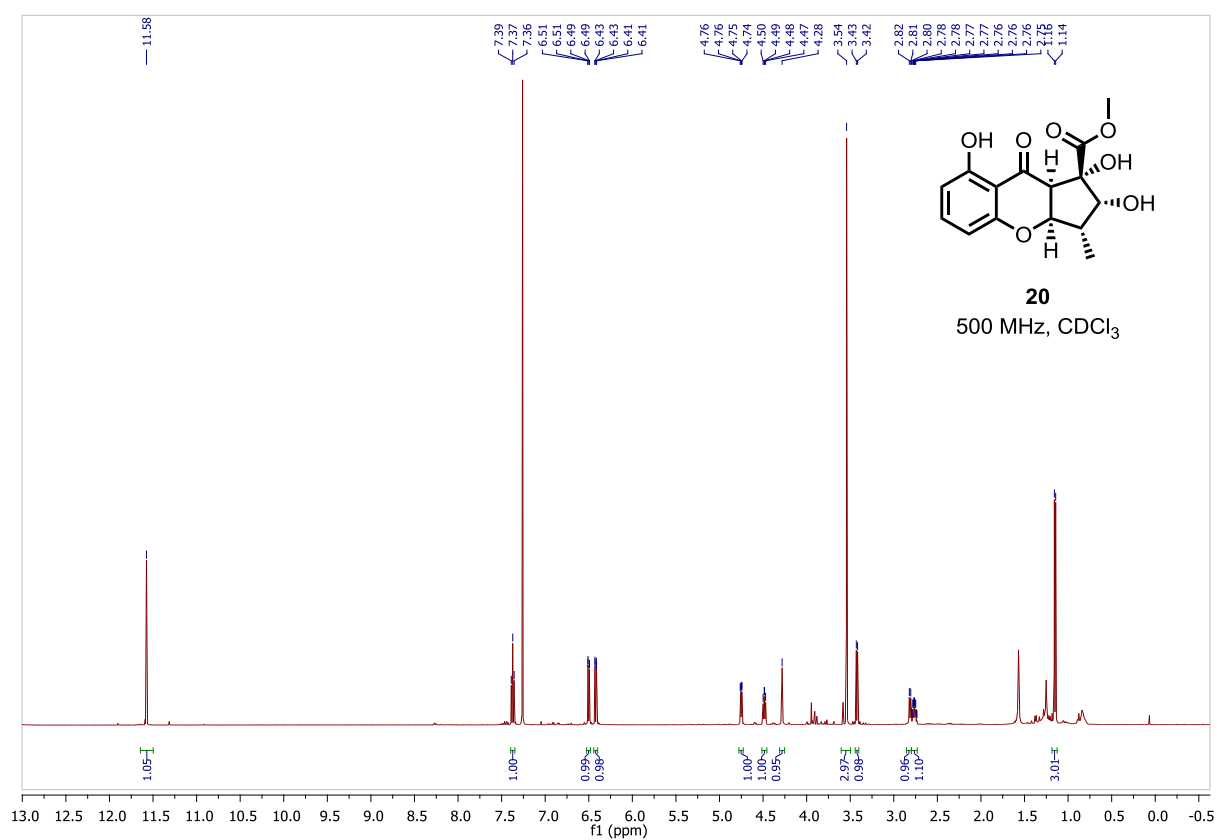

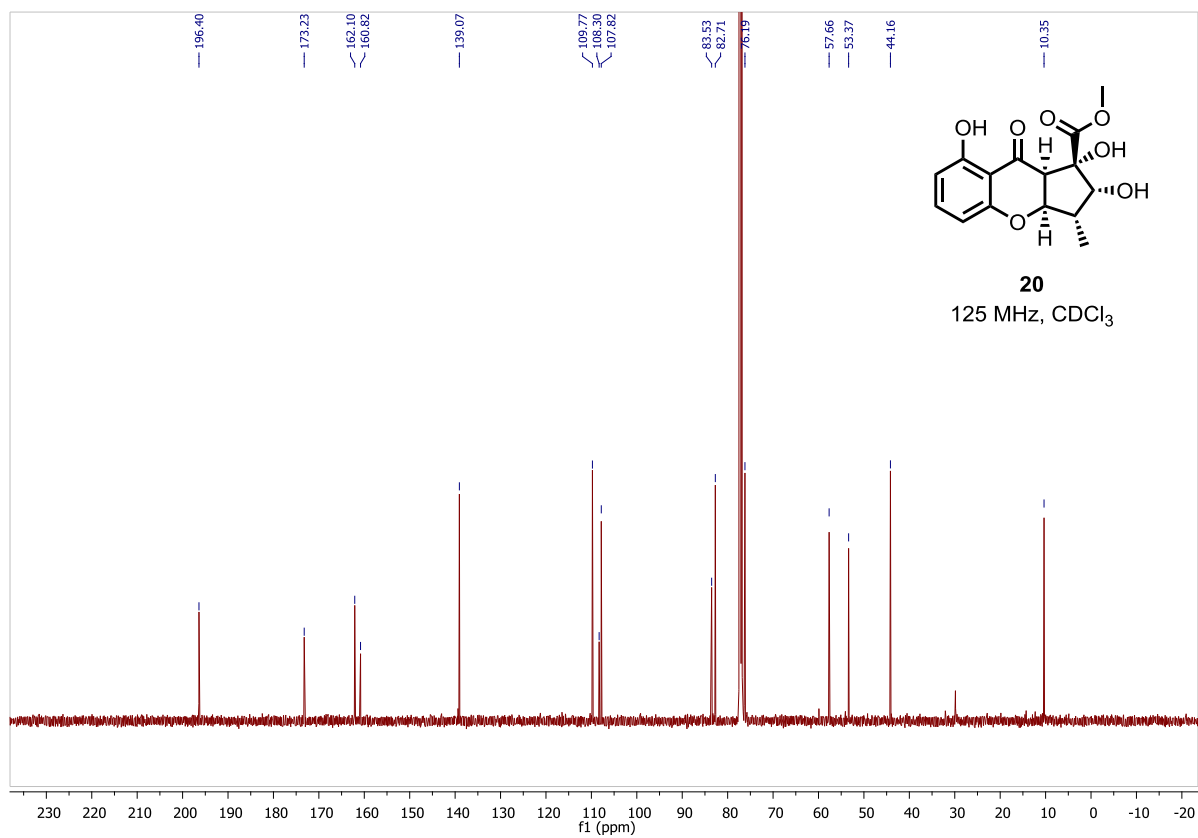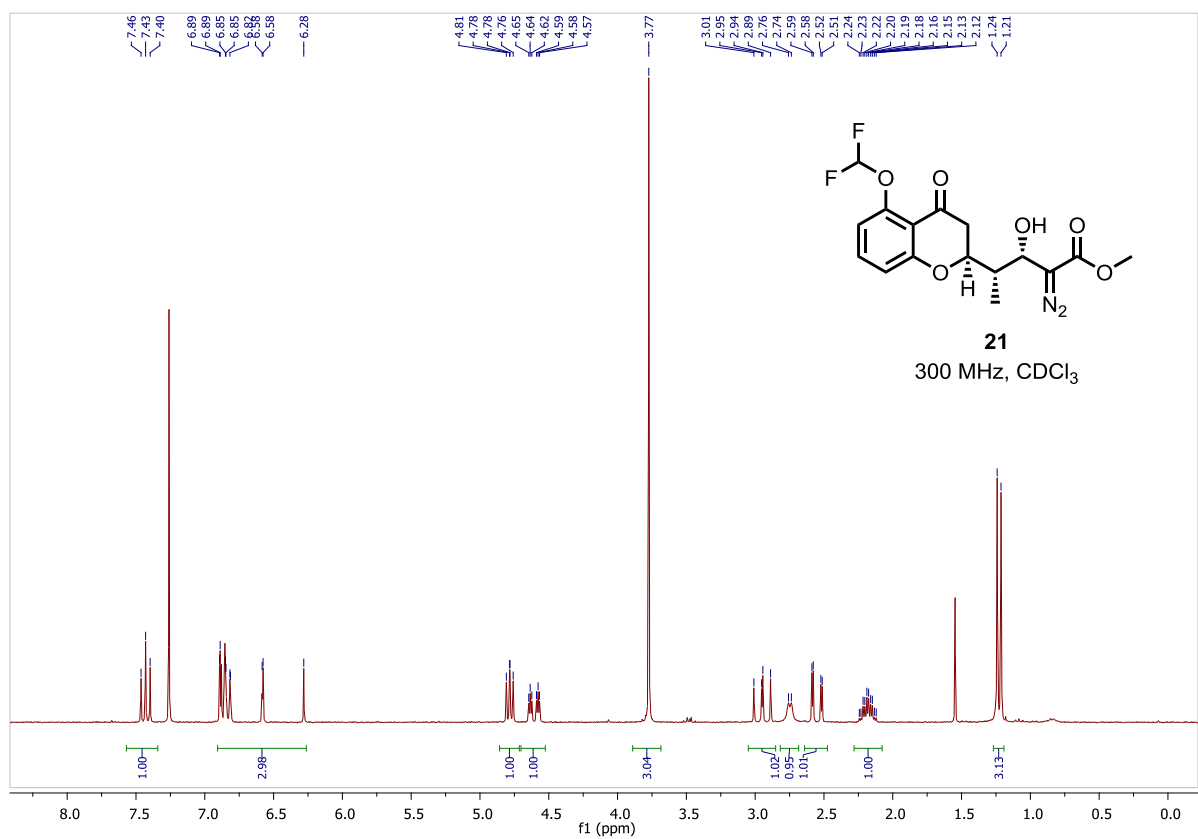

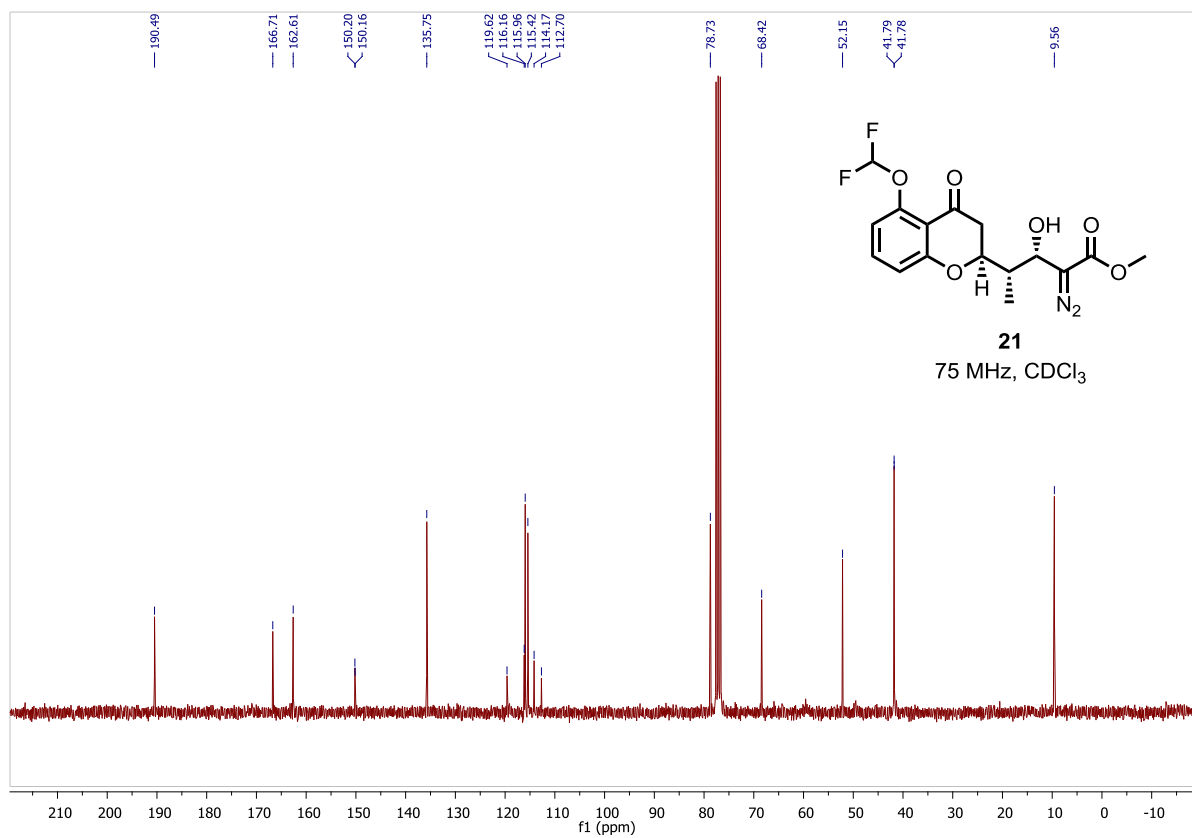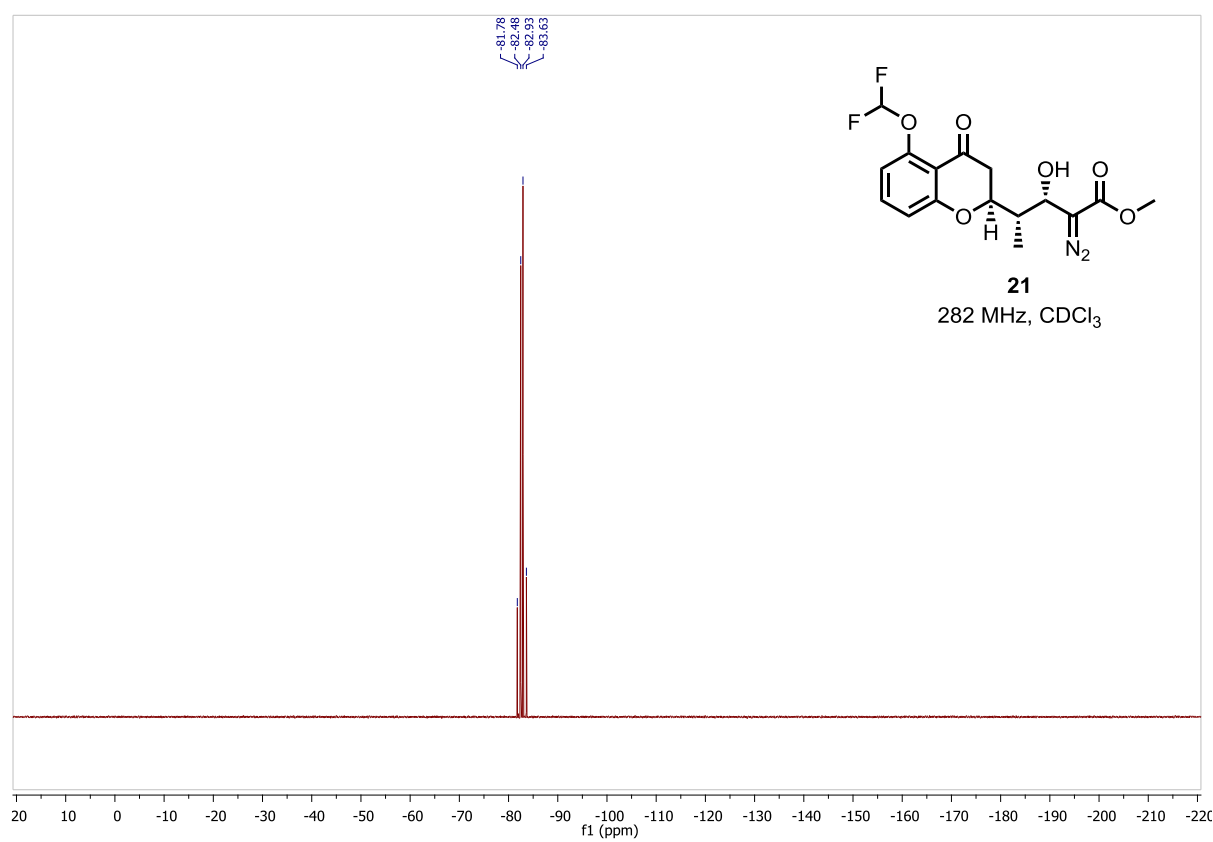

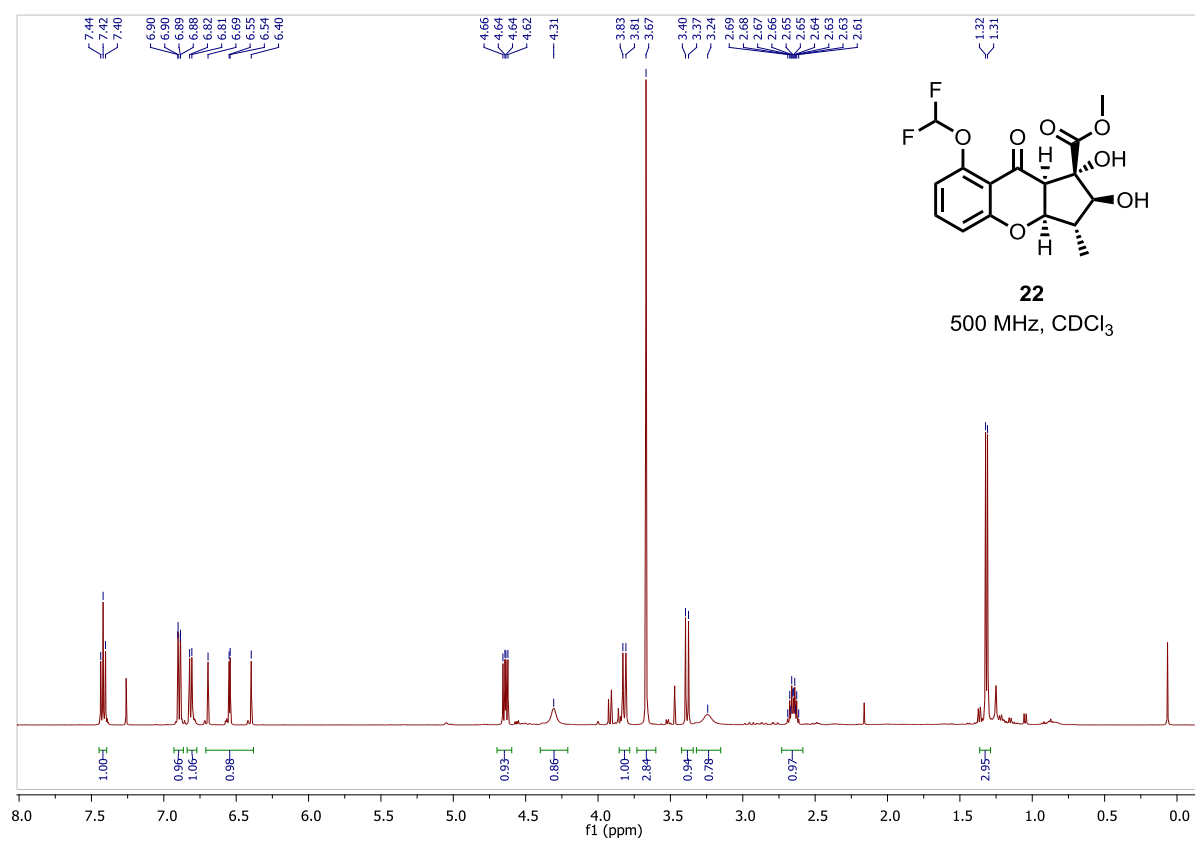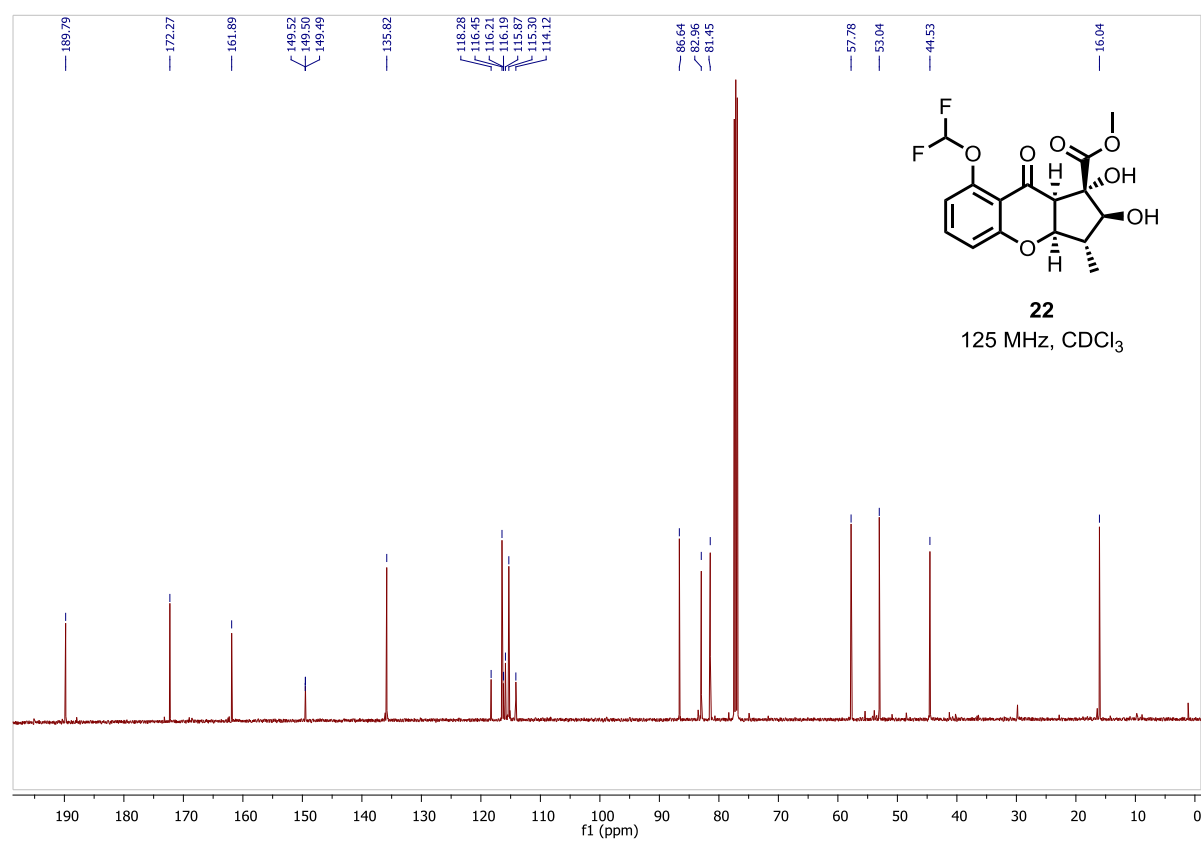



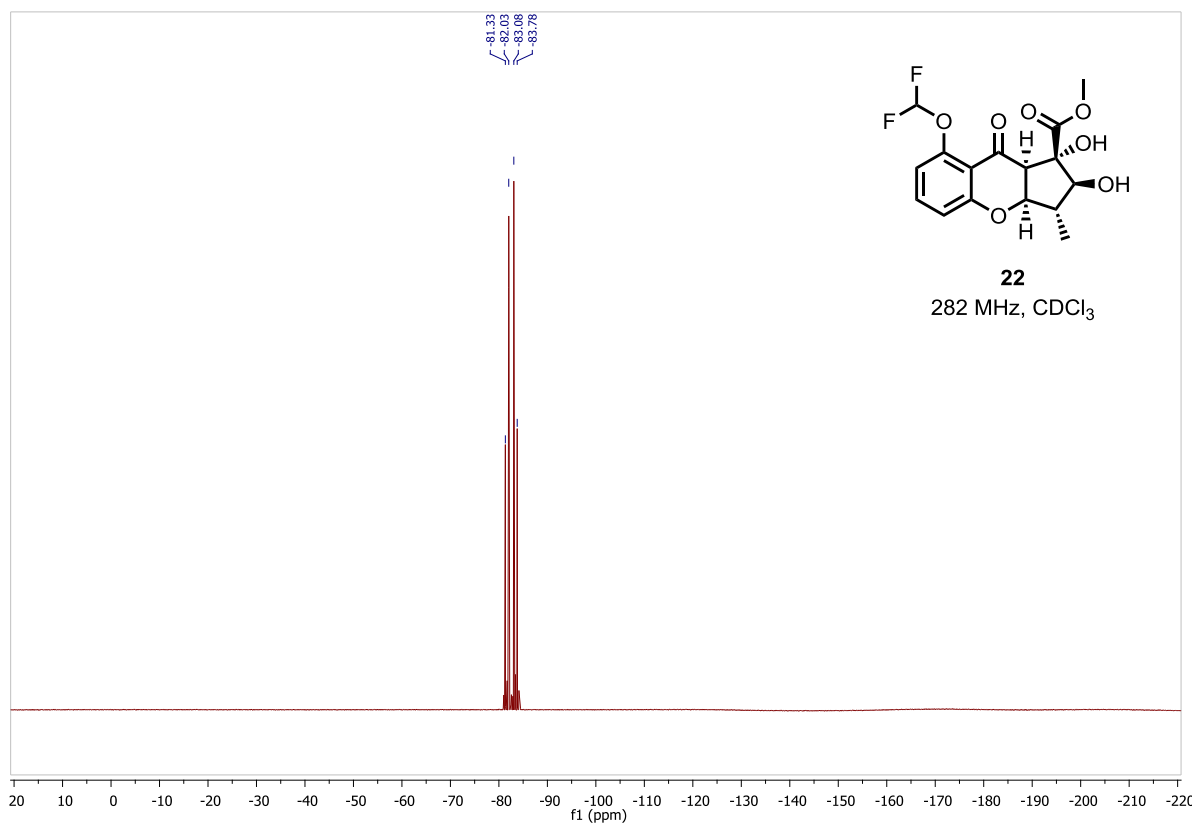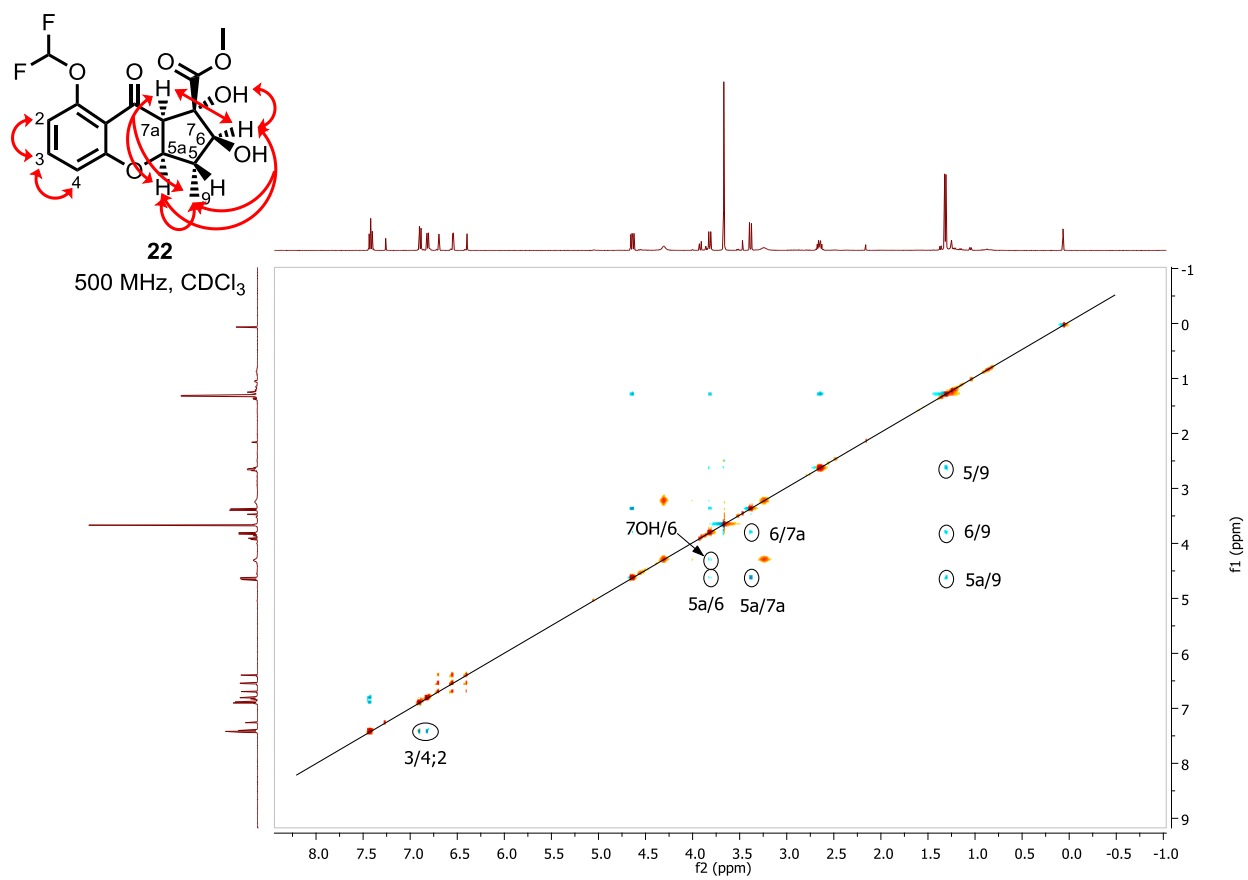

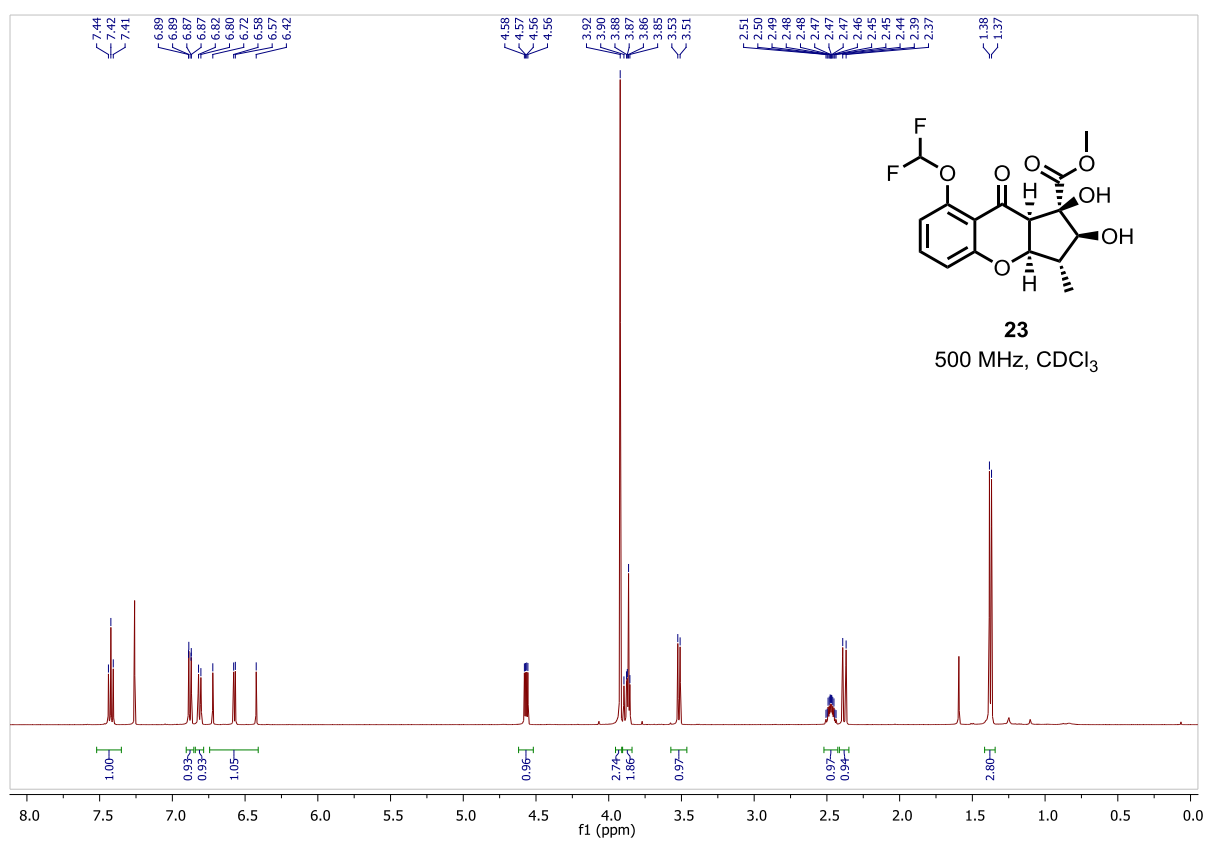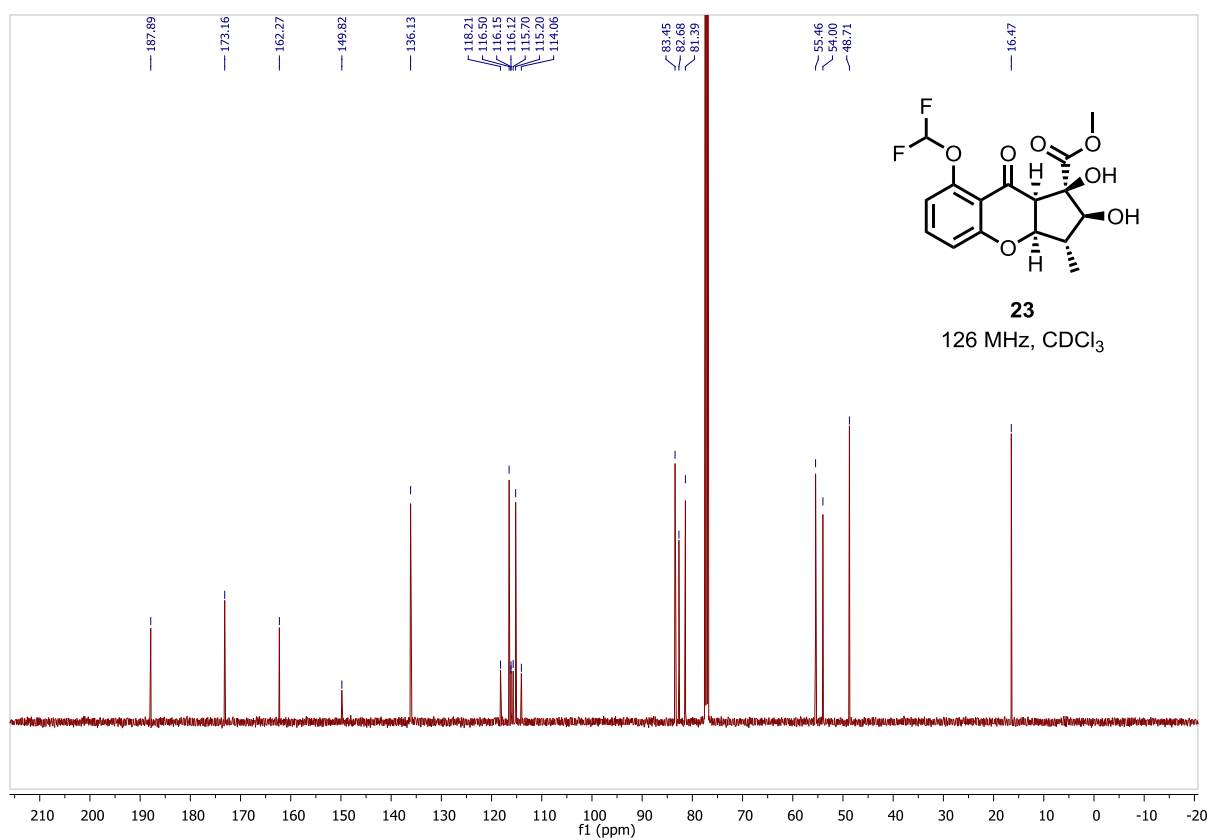

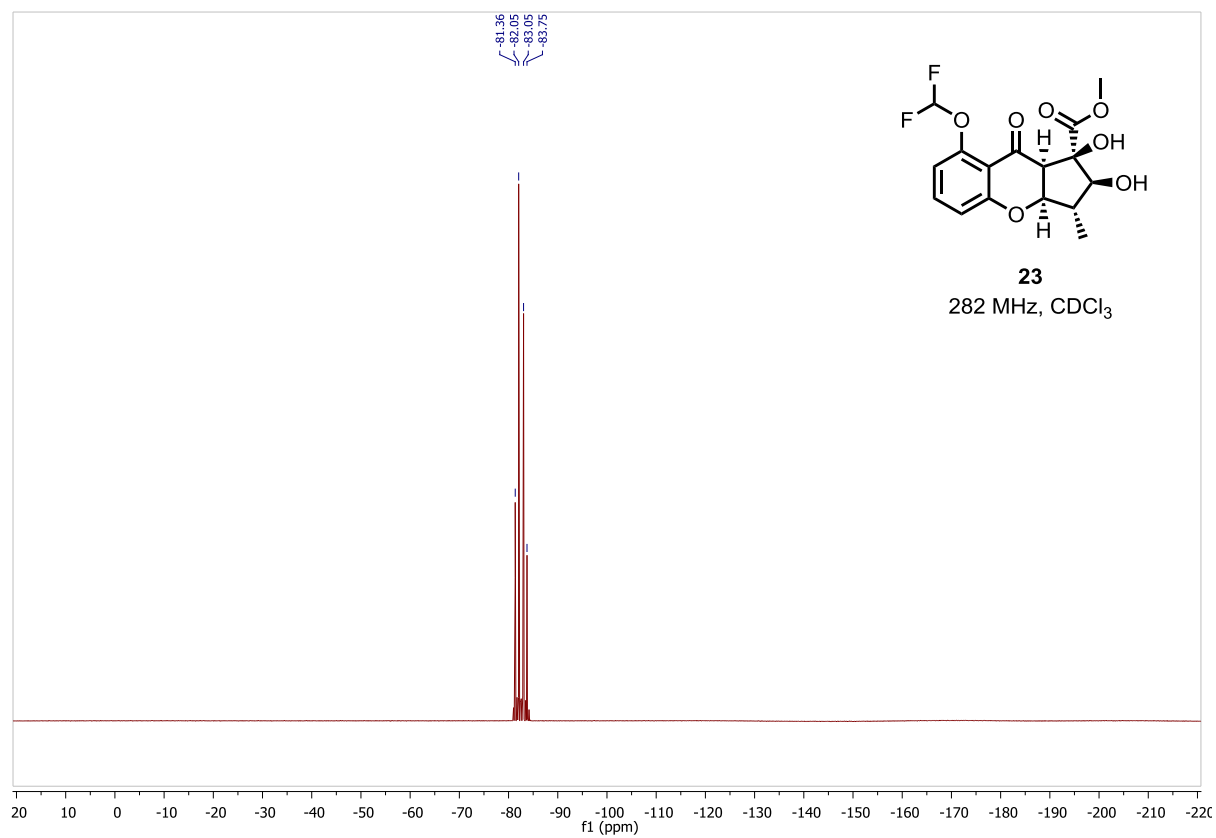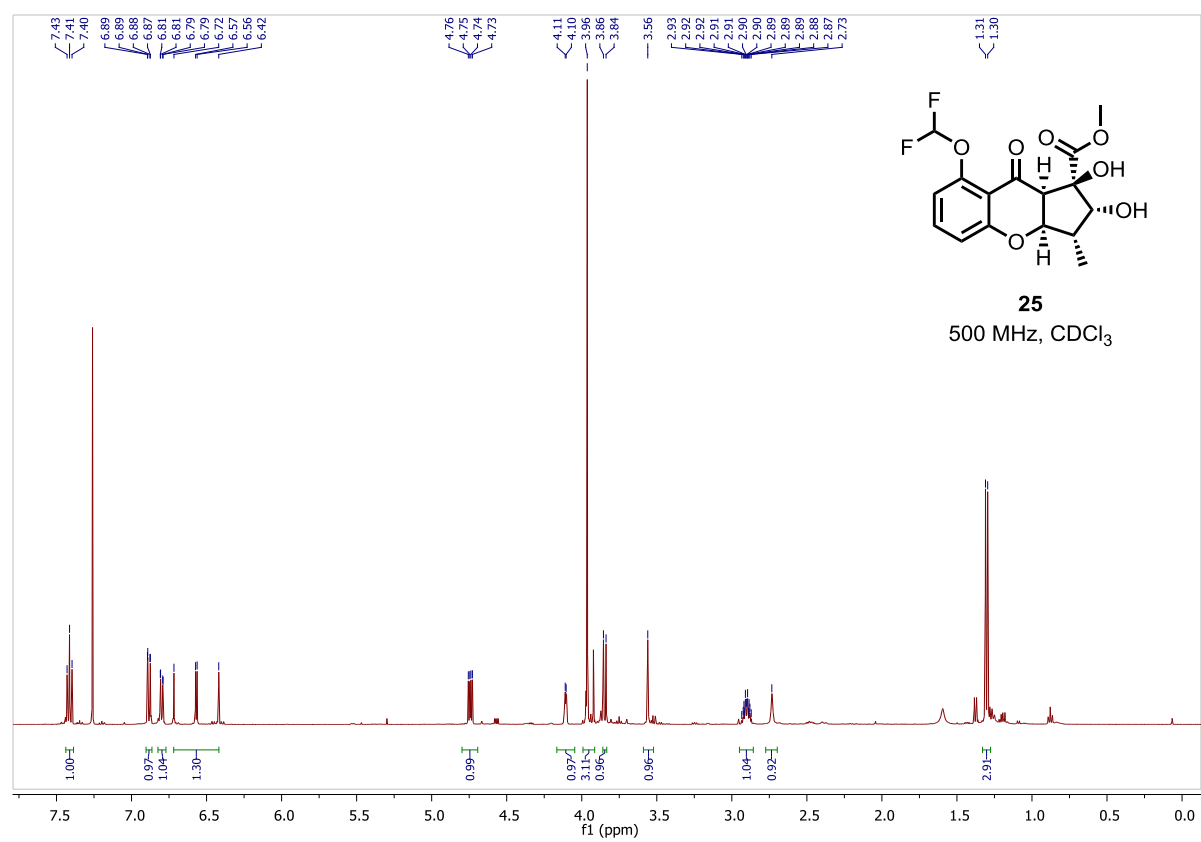

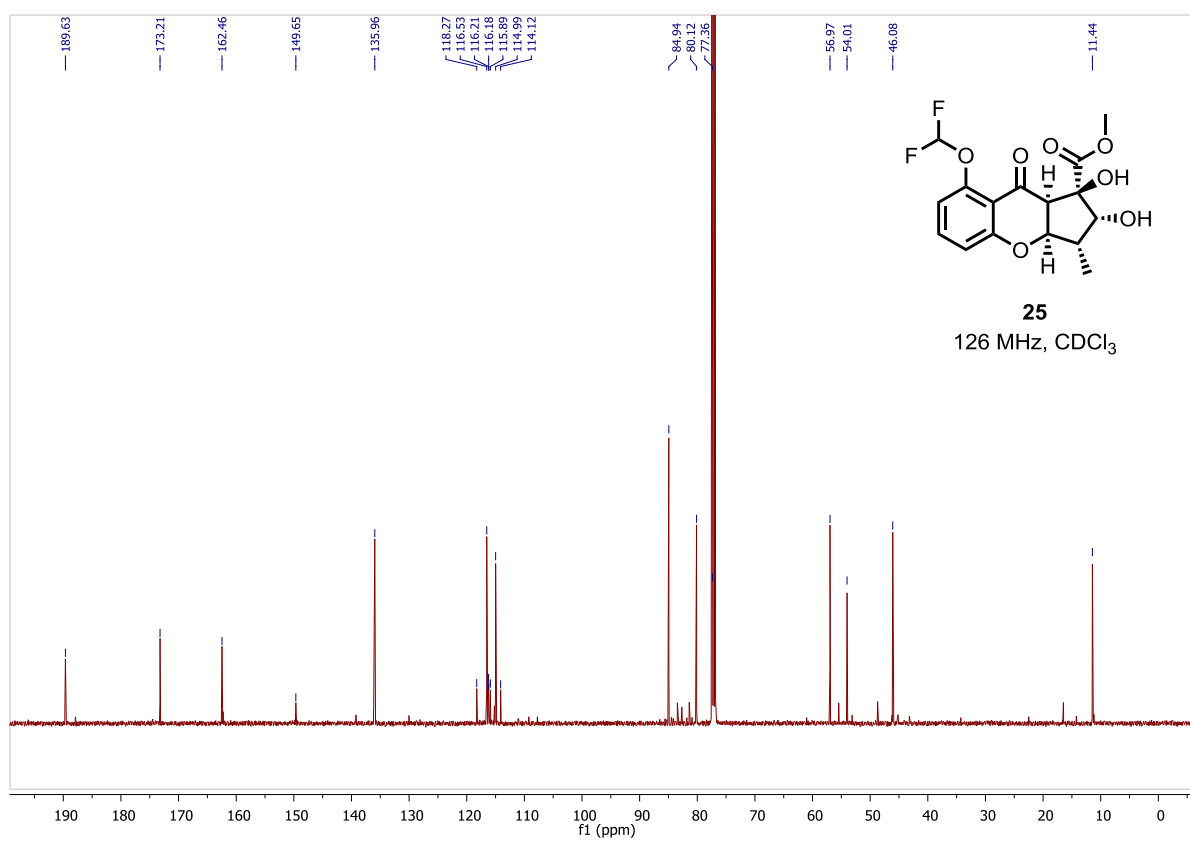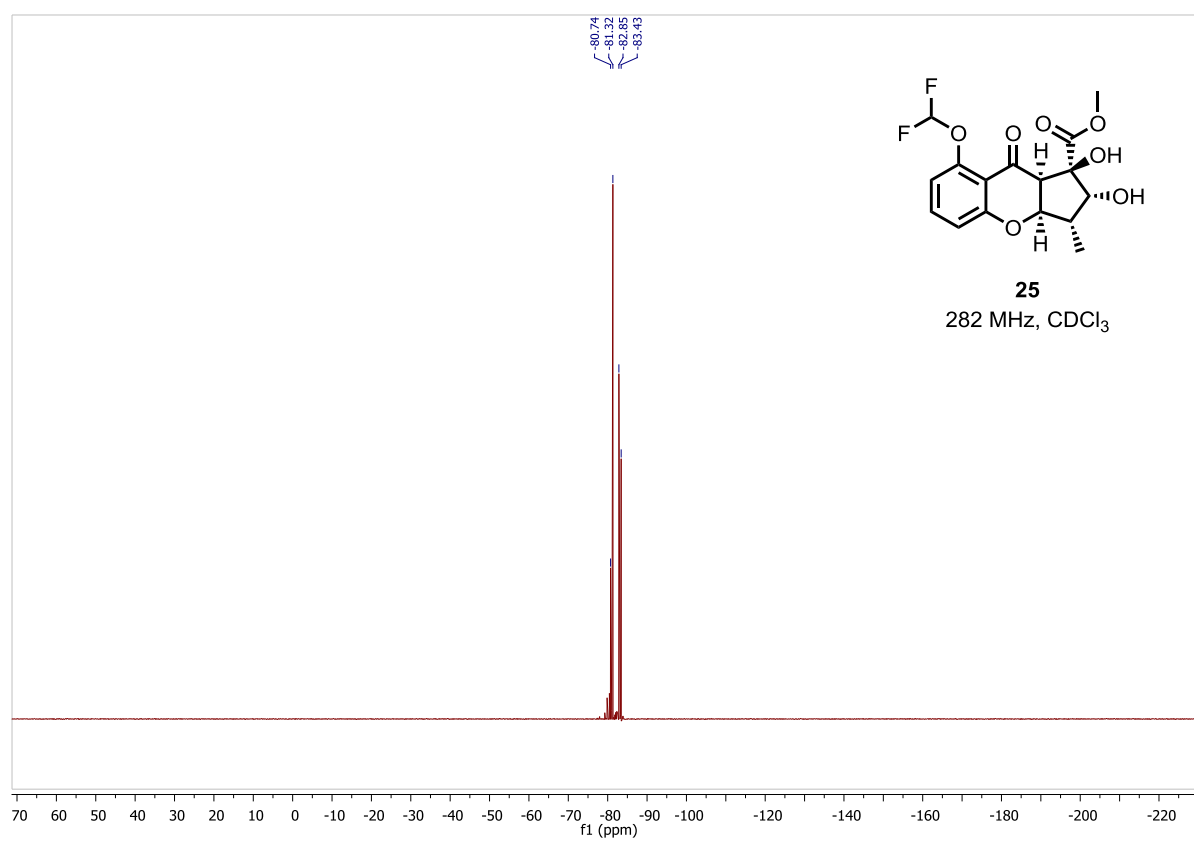

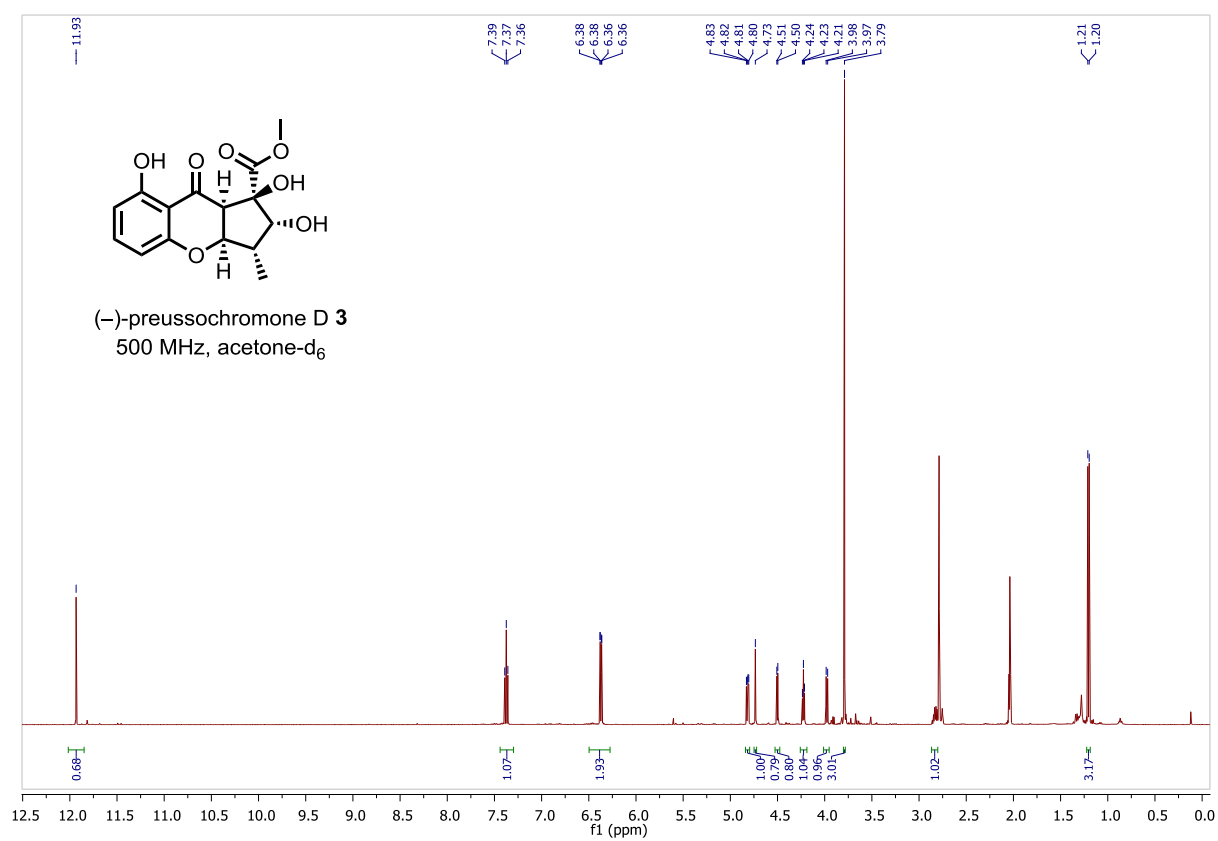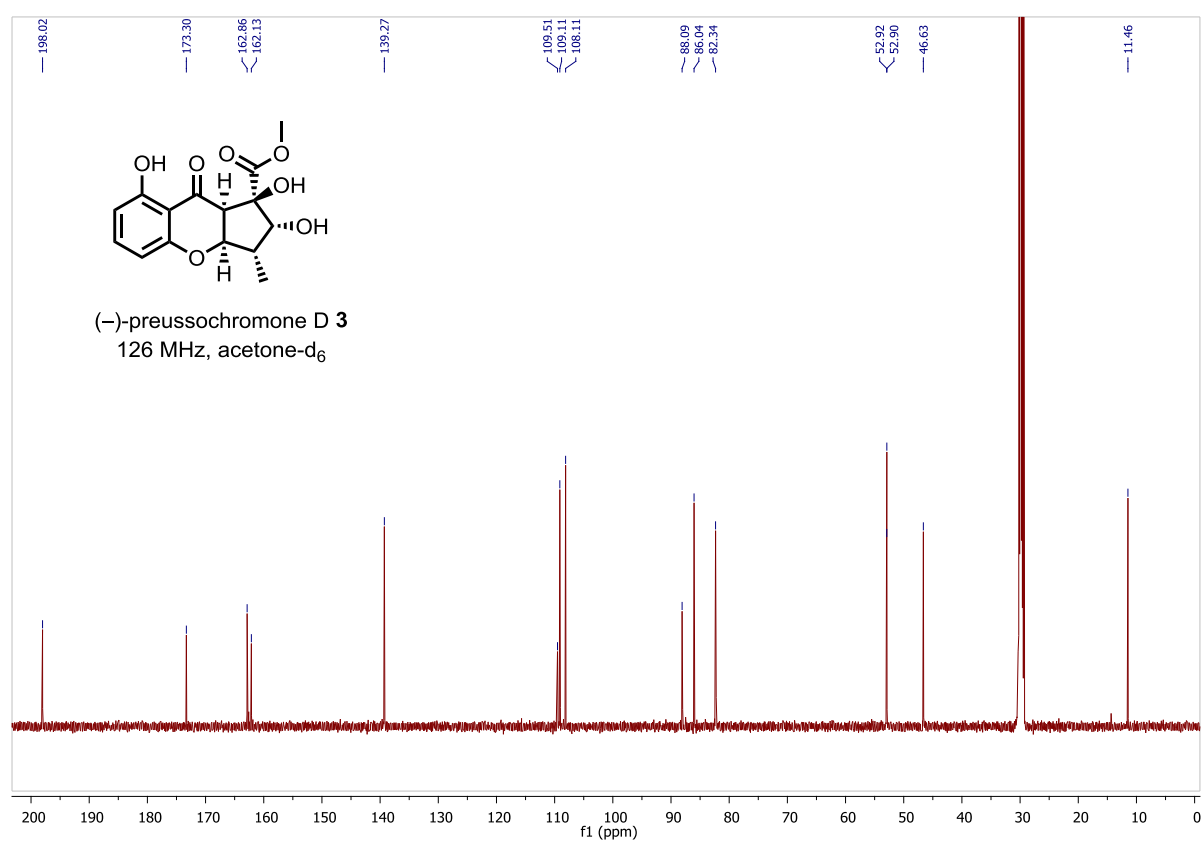

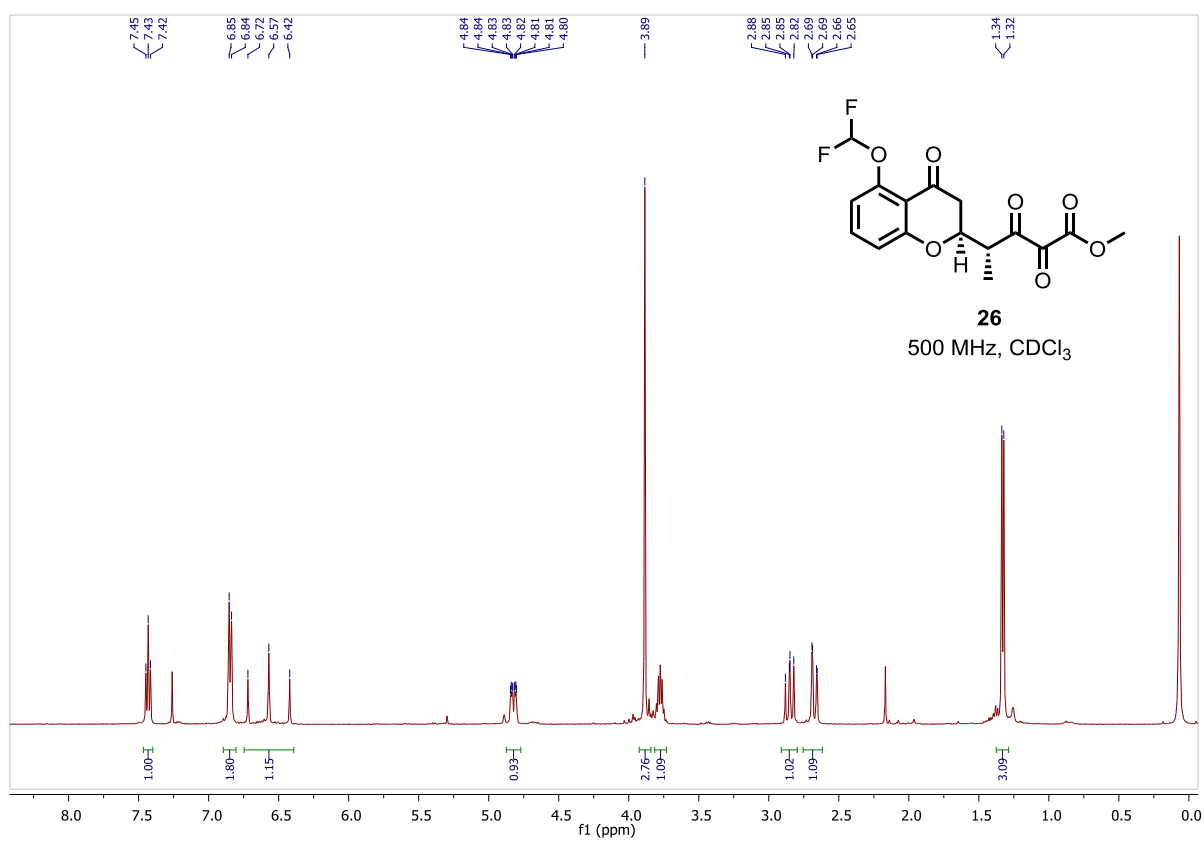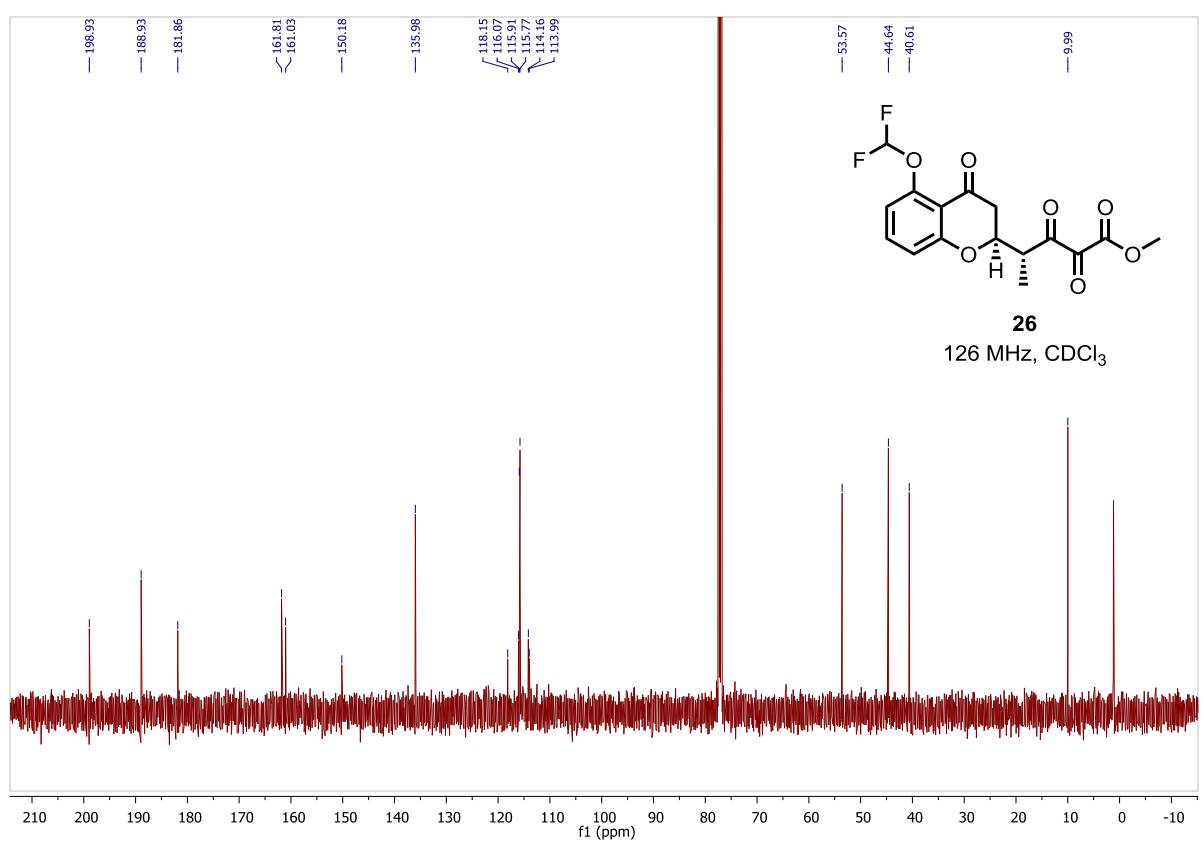

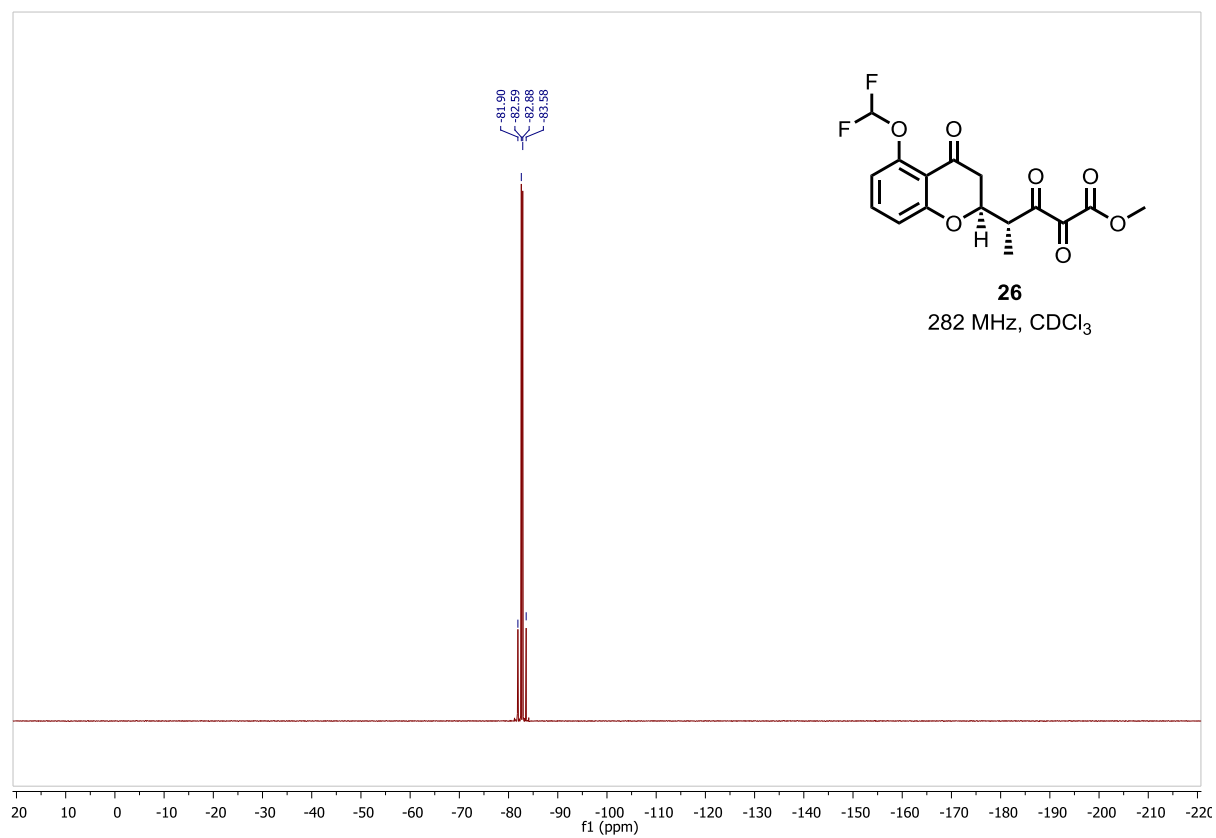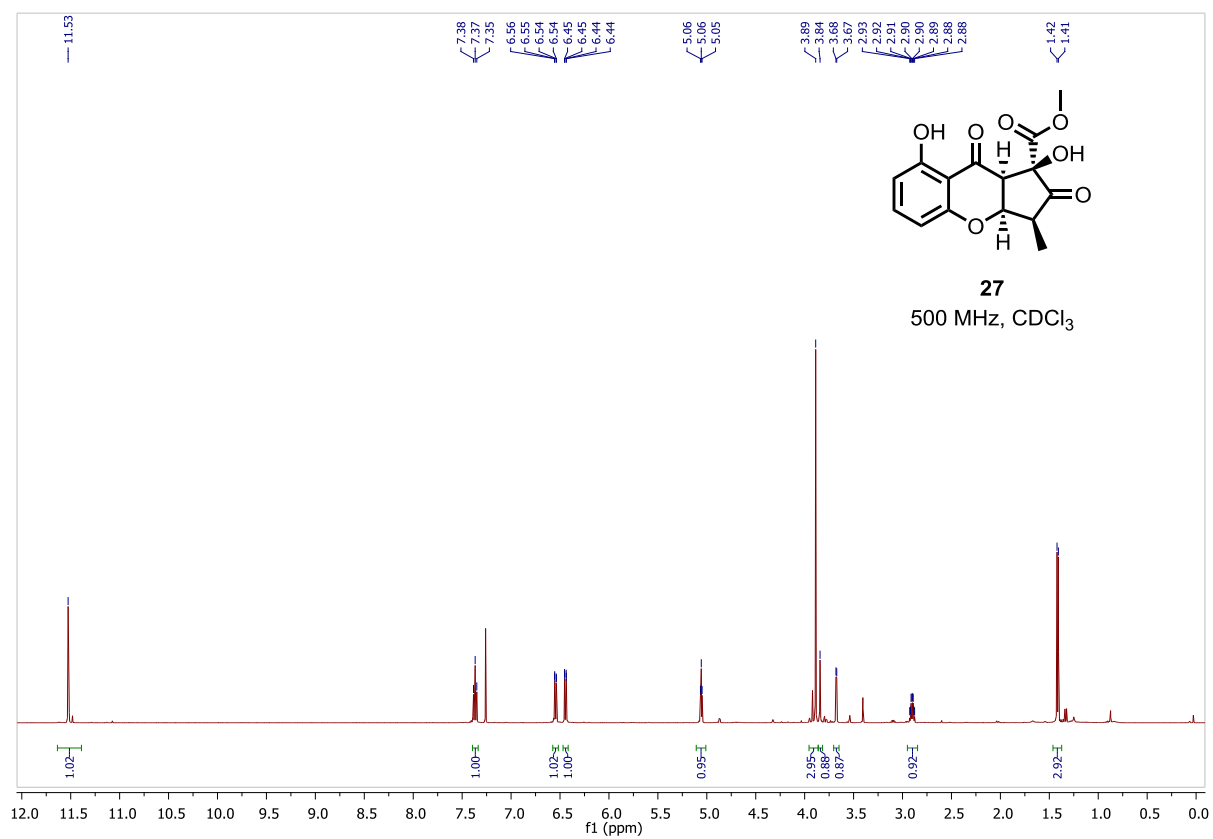

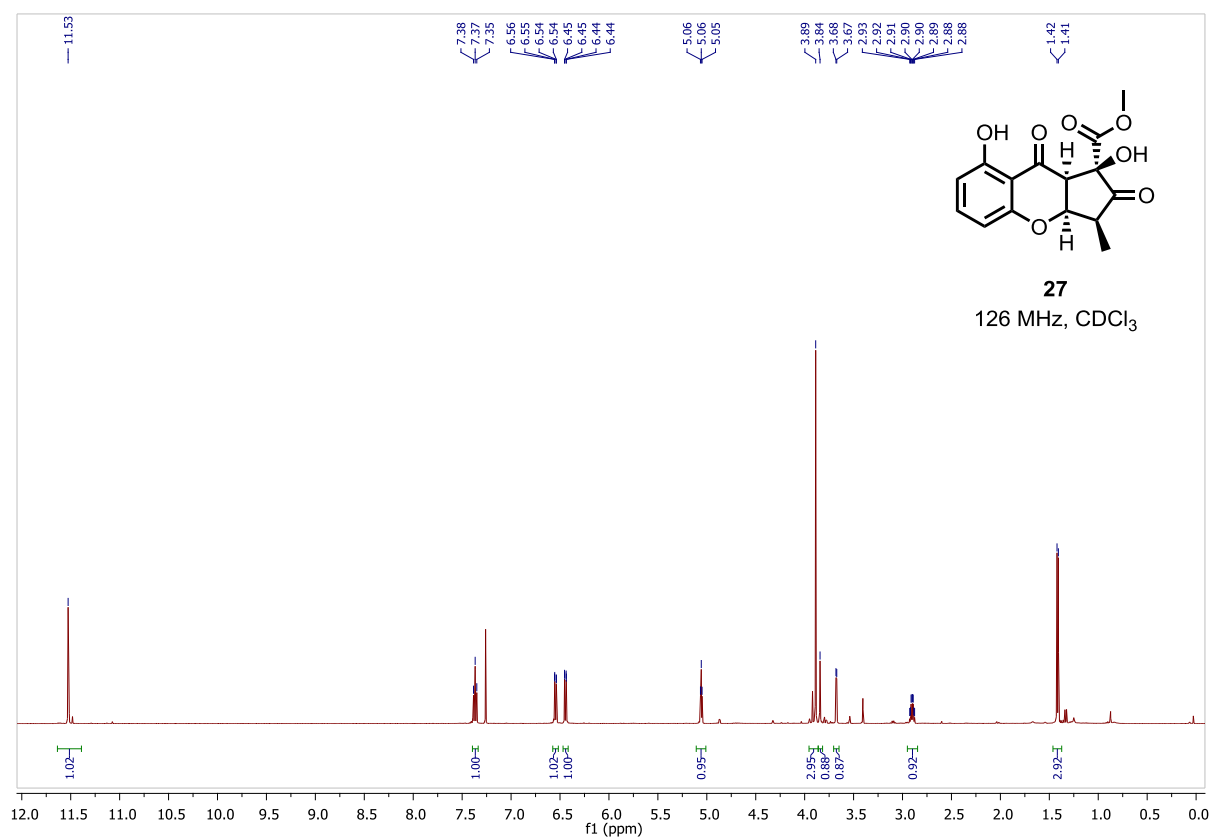



## 4 X-Ray

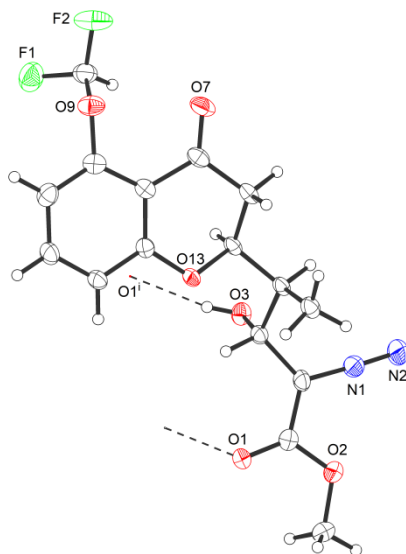

### Crystal data

|                        |                                                                              |                |
|------------------------|------------------------------------------------------------------------------|----------------|
| Habitus, colour        | plate, colourless                                                            |                |
| Crystal size           | 0.32 x 0.13 x 0.03 mm <sup>3</sup>                                           |                |
| Crystal system         | Monoclinic                                                                   |                |
| Space group            | P2 <sub>1</sub> /c                                                           | Z = 4          |
| Unit cell dimensions   | a = 14.9067(5) Å                                                             | α= 90°.        |
|                        | b = 15.3584(4) Å                                                             | β= 90.112(3)°. |
|                        | c = 7.1490(2) Å                                                              | γ = 90°.       |
| Volume                 | 1636.71(8) Å <sup>3</sup>                                                    |                |
| Cell determination     | 11647 peaks with Theta 3.0 to 75.8°.                                         |                |
| Empirical formula      | C <sub>16</sub> H <sub>16</sub> F <sub>2</sub> N <sub>2</sub> O <sub>6</sub> |                |
| Moiety formula         | C <sub>16</sub> H <sub>16</sub> F <sub>2</sub> N <sub>2</sub> O <sub>6</sub> |                |
| Formula weight         | 370.31                                                                       |                |
| Density (calculated)   | 1.503 Mg/m <sup>3</sup>                                                      |                |
| Absorption coefficient | 1.128 mm <sup>-1</sup>                                                       |                |
| F(000)                 | 768                                                                          |                |

### Data collection:

|                                 |                                  |
|---------------------------------|----------------------------------|
| Diffractometer type             | STOE STADIVARI                   |
| Wavelength                      | 1.54186 Å                        |
| Temperature                     | 100(2) K                         |
| Theta range for data collection | 2.964 to 75.817°.                |
| Index ranges                    | -18<=h<=18, -16<=k<=19, -8<=l<=6 |

|                                    |                                                               |
|------------------------------------|---------------------------------------------------------------|
| Data collection software           | X-Area Pilatus3_SV 1.31.127.0 (STOE, 2016) <sup>[12]</sup>    |
| Cell refinement software           | X-Area Recipe 1.33.0.0 (STOE, 2015) <sup>[13]</sup>           |
| Data reduction software            | X-Area Integrate 1.71.0.0 (STOE, 2016) <sup>[14]</sup>        |
|                                    | X-Area LANA 1.68.2.0 (STOE, 2016) <sup>[15]</sup>             |
| Solution and refinement:           |                                                               |
| Reflections collected              | 18665                                                         |
| Independent reflections            | 3368 [R(int) = 0.0395]                                        |
| Completeness to theta = 67.686°    | 99.9 %                                                        |
| Observed reflections               | 2638[I > 2σ(I)]                                               |
| Reflections used for refinement    | 3368                                                          |
| Absorption correction              | Semi-empirical from equivalents <sup>[15]</sup>               |
| Max. and min. transmission         | 0.8468 and 0.3716                                             |
| Largest diff. peak and hole        | 0.276 and -0.228 e.Å <sup>-3</sup>                            |
| Solution                           | intrinsic phases <sup>[16]</sup>                              |
| Refinement                         | Full-matrix least-squares on F <sup>2</sup> <sup>[17]</sup>   |
| Treatment of hydrogen atoms        | CH calculated, constr., OH located, isotr. ref.               |
| Programs used                      | XT V2014/1 (Bruker AXS Inc., 2014) <sup>[16]</sup>            |
|                                    | SHELXL-2018/3 (Sheldrick, 2018) <sup>[17]</sup>               |
|                                    | DIAMOND (Crystal Impact) <sup>[18]</sup>                      |
|                                    | ShelXle (Hübschle, Sheldrick, Dittrich, 2011) <sup>[19]</sup> |
| Data / restraints / parameters     | 3368 / 0 / 241                                                |
| Goodness-of-fit on F <sup>2</sup>  | 1.056                                                         |
| R index (all data)                 | wR2 = 0.1040                                                  |
| R index conventional [I>2sigma(I)] | R1 = 0.0373                                                   |

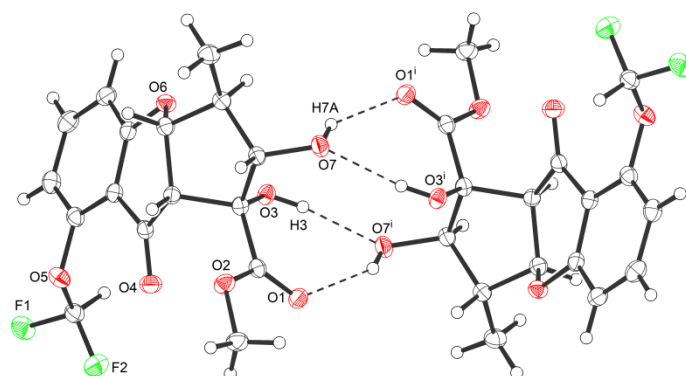

# Crystal data

|                        |                                                               |                |
|------------------------|---------------------------------------------------------------|----------------|
| Habitus, colour        | prism, colourless                                             |                |
| Crystal size           | 0.21 x 0.12 x 0.08 mm <sup>3</sup>                            |                |
| Crystal system         | Monoclinic                                                    |                |
| Space group            | P2 <sub>1</sub> /n                                            | Z = 4          |
| Unit cell dimensions   | a = 8.8431(3) Å                                               | α= 90°.        |
|                        | b = 8.7484(3) Å                                               | β= 97.632(3)°. |
|                        | c = 19.8164(7) Å                                              | γ = 90°.       |
| Volume                 | 1519.48(9) Å <sup>3</sup>                                     |                |
| Cell determination     | 17360 peaks with Theta 4.5 to 76.1°.                          |                |
| Empirical formula      | C <sub>16</sub> H <sub>16</sub> F <sub>2</sub> O <sub>7</sub> |                |
| Moiety formula         | C <sub>16</sub> H <sub>16</sub> F <sub>2</sub> O <sub>7</sub> |                |
| Formula weight         | 358.29                                                        |                |
| Density (calculated)   | 1.566 Mg/m <sup>3</sup>                                       |                |
| Absorption coefficient | 1.204 mm <sup>-1</sup>                                        |                |
| F(000)                 | 744                                                           |                |

## Data collection:

|                                 |                                                            |
|---------------------------------|------------------------------------------------------------|
| Diffractometer type             | STOE STADIVARI                                             |
| Wavelength                      | 1.54186 Å                                                  |
| Temperature                     | 100(2) K                                                   |
| Theta range for data collection | 4.503 to 75.447°.                                          |
| Index ranges                    | -10<=h<=11, -9<=k<=10, -24<=l<=16                          |
| Data collection software        | X-Area Pilatus3_SV 1.31.127.0 (STOE, 2016) <sup>[12]</sup> |
| Cell refinement software        | X-Area Recipe 1.33.0.0 (STOE, 2015) <sup>[13]</sup>        |
| Data reduction software         | X-Area Integrate 1.71.0.0 (STOE, 2016) <sup>[14]</sup>     |
|                                 | X-Area LANA 1.68.2.0 (STOE, 2016) <sup>[15]</sup>          |

# Solution and refinement:

|                                    |                                                                                                                                                                                                                    |
|------------------------------------|--------------------------------------------------------------------------------------------------------------------------------------------------------------------------------------------------------------------|
| Reflections collected              | 15502                                                                                                                                                                                                              |
| Independent reflections            | 3091 [R(int) = 0.0283]                                                                                                                                                                                             |
| Completeness to theta = 67.686°    | 99.7 %                                                                                                                                                                                                             |
| Observed reflections               | 2659[I > 2σ(I)]                                                                                                                                                                                                    |
| Reflections used for refinement    | 3091.                                                                                                                                                                                                              |
| Absorption correction              | Semi-empirical from equivalents <sup>[15]</sup>                                                                                                                                                                    |
| Max. and min. transmission         | 0.8373 and 0.2650                                                                                                                                                                                                  |
| Largest diff. peak and hole        | 0.331 and -0.231 e.Å <sup>-3</sup>                                                                                                                                                                                 |
| Solution                           | intrinsic phases <sup>[16]</sup>                                                                                                                                                                                   |
| Refinement                         | Full-matrix least-squares on F <sup>2</sup> <sup>[17]</sup>                                                                                                                                                        |
| Treatment of hydrogen atoms        | CH calculated, constr., OH located, isotropic ref.                                                                                                                                                                 |
| Programs used                      | XT V2014/1 (Bruker AXS Inc., 2014) <sup>[16]</sup><br>SHELXL-2018/3 (Sheldrick, 2018) <sup>[17]</sup><br>DIAMOND (Crystal Impact) <sup>[18]</sup><br>ShelXle (Hübschle, Sheldrick, Dittrich, 2011) <sup>[19]</sup> |
| Data / restraints / parameters     | 3091 / 0 / 236                                                                                                                                                                                                     |
| Goodness-of-fit on F <sup>2</sup>  | 1.053                                                                                                                                                                                                              |
| R index (all data)                 | wR2 = 0.0888                                                                                                                                                                                                       |
| R index conventional [I>2sigma(I)] | R1 = 0.0321                                                                                                                                                                                                        |

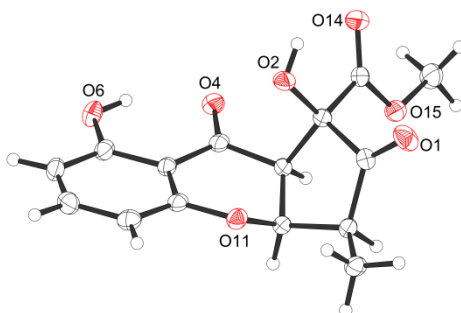

# Crystal data

|                        |                                                |                 |
|------------------------|------------------------------------------------|-----------------|
| Habitus, colour        | plate, colourless                              |                 |
| Crystal size           | 0.27 x 0.05 x 0.04 mm <sup>3</sup>             |                 |
| Crystal system         | Monoclinic                                     |                 |
| Space group            | P2 <sub>1</sub> /n                             | Z = 4           |
| Unit cell dimensions   | a = 12.1155(3) Å                               | α= 90°.         |
|                        | b = 10.1088(3) Å                               | β= 114.983(2)°. |
|                        | c = 12.2188(4) Å                               | γ = 90°.        |
| Volume                 | 1356.45(7) Å <sup>3</sup>                      |                 |
| Cell determination     | 15585 peaks with Theta 4.3 to 76.2°.           |                 |
| Empirical formula      | C <sub>15</sub> H <sub>14</sub> O <sub>7</sub> |                 |
| Moiety formula         | C <sub>15</sub> H <sub>14</sub> O <sub>7</sub> |                 |
| Formula weight         | 306.26                                         |                 |
| Density (calculated)   | 1.500 Mg/m <sup>3</sup>                        |                 |
| Absorption coefficient | 1.028 mm <sup>-1</sup>                         |                 |
| F(000)                 | 640                                            |                 |

## Data collection:

|                                 |                                                            |
|---------------------------------|------------------------------------------------------------|
| Diffractometer type             | STOE STADIVARI                                             |
| Wavelength                      | 1.54178 Å                                                  |
| Temperature                     | 100(2) K                                                   |
| Theta range for data collection | 4.309 to 75.588°.                                          |
| Index ranges                    | -15<=h<=11, -12<=k<=11, -7<=l<=15                          |
| Data collection software        | X-Area Pilatus3_SV 1.31.127.0 (STOE, 2016) <sup>[12]</sup> |
| Cell refinement software        | X-Area Recipe 1.33.0.0 (STOE, 2015) <sup>[13]</sup>        |
| Data reduction software         | X-Area Integrate 1.71.0.0 (STOE, 2016) <sup>[14]</sup>     |
|                                 | X-Area LANA 1.68.2.0 (STOE, 2016) <sup>[15]</sup>          |

## Solution and refinement:

|                       |       |
|-----------------------|-------|
| Reflections collected | 14565 |
|-----------------------|-------|

|                                    |                                                                                                                                                                                                                    |
|------------------------------------|--------------------------------------------------------------------------------------------------------------------------------------------------------------------------------------------------------------------|
| Independent reflections            | 2761 [R(int) = 0.0347]                                                                                                                                                                                             |
| Completeness to theta = 67.679°    | 99.2 %                                                                                                                                                                                                             |
| Observed reflections               | 2394[I > 2σ(I)]                                                                                                                                                                                                    |
| Reflections used for refinement    | 2761                                                                                                                                                                                                               |
| Absorption correction              | Semi-empirical from equivalents <sup>[15]</sup>                                                                                                                                                                    |
| Max. and min. transmission         | 0.8582 and 0.5344                                                                                                                                                                                                  |
| Largest diff. peak and hole        | 0.385 and -0.205 e.Å <sup>-3</sup>                                                                                                                                                                                 |
| Solution                           | intrinsic phases <sup>[16]</sup>                                                                                                                                                                                   |
| Refinement                         | Full-matrix least-squares on F <sup>2</sup> <sup>[17]</sup>                                                                                                                                                        |
| Treatment of hydrogen atoms        | CH 'riding model'; OH located, isotropic refinement                                                                                                                                                                |
| Programs used                      | XT V2014/1 (Bruker AXS Inc., 2014) <sup>[16]</sup><br>SHELXL-2018/3 (Sheldrick, 2018) <sup>[17]</sup><br>DIAMOND (Crystal Impact) <sup>[18]</sup><br>ShelXle (Hübschle, Sheldrick, Dittrich, 2011) <sup>[19]</sup> |
| Data / restraints / parameters     | 2761 / 97 / 229                                                                                                                                                                                                    |
| Goodness-of-fit on F <sup>2</sup>  | 1.082                                                                                                                                                                                                              |
| R index (all data)                 | wR2 = 0.1088                                                                                                                                                                                                       |
| R index conventional [I>2sigma(I)] | R1 = 0.0386                                                                                                                                                                                                        |

## 5 Literature

- [1] T. Arai, H. Sasai, K. Aoe, K. Okamura, T. Date, M. Shibasaki, *Angew. Chem. Int. Ed.* **1996**, 35, 104.
- [2] J. DeRuiter, R.F. Borne, C.A. Mayfield, *J. Med. Chem.* **1989**, 32, 145.
- [3] M.A.M. Behnam, D. Graf, R. Bartenschlager, D.P. Zlotos, C.D. Klein, *J. Med. Chem.* **2015**, 58, 9354.
- [4] S. Kiyooka, Y. Kaneko, M. Komura, H. Matsuo, M. Nakano, *J. Org. Chem.* **1991**, 56, 2276.
- [5] J. Wu, N. Yoshikai, *Angew. Chem. Int. Ed.* **2016**, 55, 336.
- [6] A.R. Rao, A.S. Gaitonde, K.R.C. Prakash, S.P. Rao, *Tetrahedron Lett.* **1994**, 35, 6347.
- [7] T.R. Hoye, C.S. Jeffrey, F. Shao, *Nature Protocols*, **2007**, 2, 2451.
- [8] N.E. Searle, *Org. Synth.* **1963**, 36, 25.
- [9] W. Adam, J. Bialas, L. Hadjirapoglou, *Chem. Ber.* **1991**, 124, 2377.
- [10] Zhang, F.; Li, L.; Niu, S.; Si, Y.; Guo, L.; Jiang, X.; Che, Y. *J. Nat. Prod.*, **2012**, 75, 230-237.
- [11] T. Okabayashi, A. Iida, K. Takai, Y. Nawate, T. Misaki, Y. Tanabe, *J. Org. Chem.* **2007**, 72, 8142.

- [12] *X-Area Pilatus3\_SV*, STOE & Cie GmbH, Darmstadt, Germany, **2016**.
- [13] *X-Area Recipe*, STOE & Cie GmbH, Darmstadt, Germany, **2015**.
- [14] *X-Area Integrate*, STOE & Cie GmbH, Darmstadt, Germany, **2016**.
- [15] *X-Area LANA*, STOE & Cie GmbH, Darmstadt, Germany, **2016**.
- [16] G. M. Sheldrick, *Acta Crystallogr A Found Adv* **2015**, 71, 3.
- [17] G. M. Sheldrick, *Acta crystallographica. Section C, Structural chemistry* **2015**, 71, 3.
- [18] K. Brandenburg, *Diamond - Crystal and Molecular Structure Visualization*, Crystal Impact - Dr. H. Putz & Dr. K. Brandenburg GbR, Bonn, Germany, **2014**.
- [19] C. B. Hübschle, G. M. Sheldrick, B. Dittrich, *Journal of applied crystallography* **2011**, 44, 1281.
